# Supplementary material for: Computational identification of developmental enhancers: conservation and function of transcription factor binding-site clusters in Drosophila melanogaster and Drosophila pseudoobscura
Source: Springer Nature journal article supplement (doi:10.1186/gb-2004-5-9-r61), 2004-08-20
Supplement: Additional file 3 [file gb-2004-5-9-r61-s3.pdf]

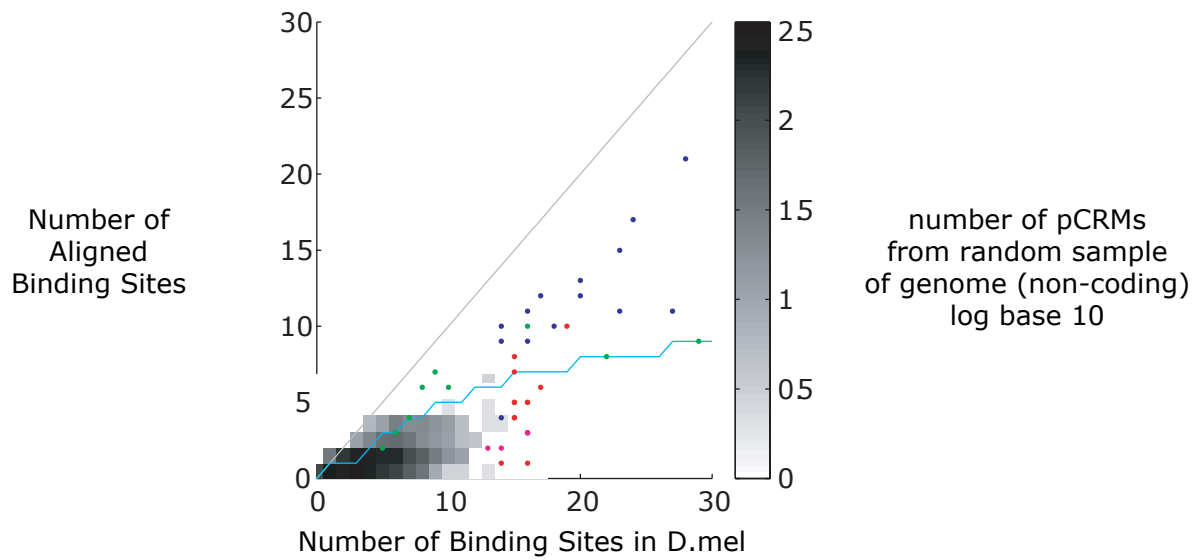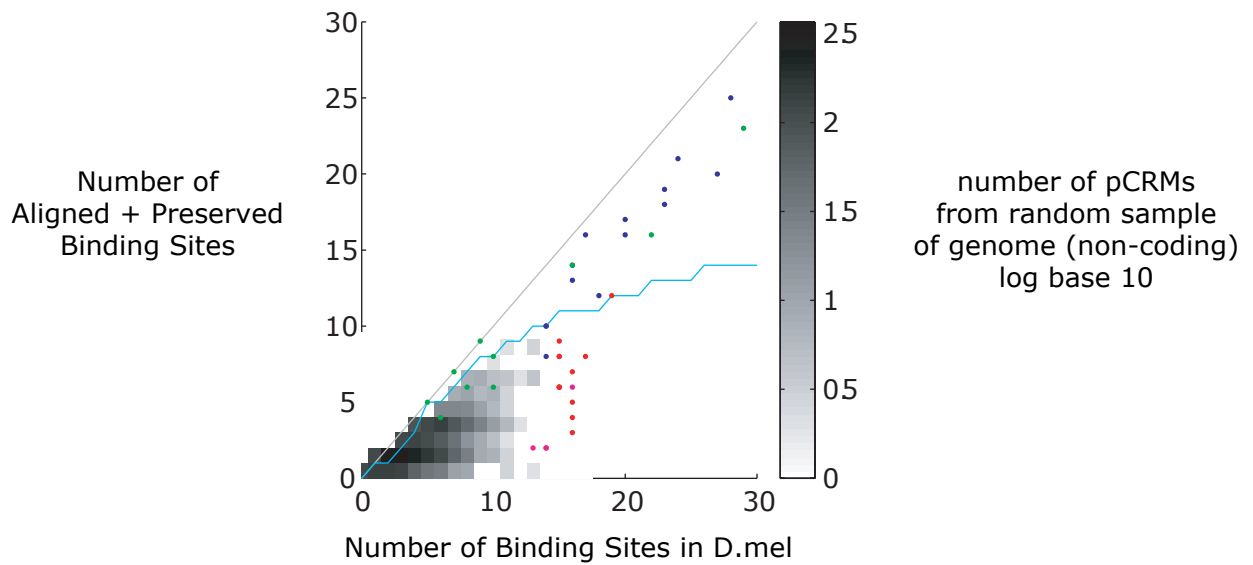

— Discrimination Equation

- True CRMs
- True CRMs (below Berman, 2002 threshold)
- Non-functional pCRMs
- Ambiguous expression pCRMs
