# Supplementary material for: Computational identification of developmental enhancers: conservation and function of transcription factor binding-site clusters in Drosophila melanogaster and Drosophila pseudoobscura
Source: Springer Nature journal article supplement (doi:10.1186/gb-2004-5-9-r61), 2004-08-20
Supplement: Additional file 5 [file gb-2004-5-9-r61-s5.pdf]

| pCRM    | name                | BPB2002 ID | Chrom arm | pCRM start | pCRM end   | pCRM len | tested fragment start | tested fragment end | tested fragment len | tested fragment                          |                                        |
|---------|---------------------|------------|-----------|------------|------------|----------|-----------------------|---------------------|---------------------|------------------------------------------|----------------------------------------|
|         |                     |            |           |            |            |          |                       |                     |                     | forward primer                           | reverse primer                         |
| PCE7001 | runt stripe 3       |            | X         | 20,357,206 | 20,358,294 | 1,089    | 20,355,604            | 20,358,006          | 2,403               |                                          |                                        |
| PCE7002 | eve stripes 3/7     |            | 2R        | 5,035,494  | 5,036,771  | 1,278    | 5,036,134             | 5,036,643           | 510                 |                                          |                                        |
| PCE7003 | eve stripe 2        |            | 2R        | 5,038,454  | 5,039,040  | 587      | 5,038,623             | 5,039,014           | 392                 |                                          |                                        |
| PCE7004 | eve stripes 4/6     |            | 2R        | 5,044,597  | 5,045,395  | 799      | 5,044,530             | 5,045,130           | 601                 |                                          |                                        |
| PCE7005 | hairy stripe 7      |            | 3L        | 8,624,351  | 8,625,245  | 895      | 8,623,788             | 8,624,718           | 931                 |                                          |                                        |
| PCE7006 | hairy stripe 6      |            | 3L        | 8,625,452  | 8,626,319  | 868      | 8,625,560             | 8,626,105           | 546                 |                                          |                                        |
| PCE7007 | hairy stripes 1,5   |            | 3L        | 8,629,180  | 8,629,966  | 787      | 8,628,790             | 8,630,509           | 1,720               |                                          |                                        |
| PCE7008 | kni upstream        |            | 3L        | 20,615,070 | 20,616,425 | 1,356    | 20,615,080            | 20,616,107          | 1,028               |                                          |                                        |
| PCE7009 | hb HZ1.4            |            | 3R        | 4,526,315  | 4,527,521  | 1,207    | 4,526,537             | 4,527,957           | 1,421               |                                          |                                        |
| PCE8001 | gt posterior domain | 1          | X         | 2,187,439  | 2,188,382  | 944      | 2,187,356             | 2,188,453           | 1,098               | 5'-TTAGGCGCGCCAGAACTTACCATCACTTCG-3'     | 5'-ATTGCGCCGCCCATTCAGGGGATTGGG-3'      |
| PCE8010 | odd stripes 3/6     | 2          | 2L        | 3,601,750  | 3,602,509  | 760      | 3,601,404             | 3,602,776           | 1,373               | 5'-TTAGGCGCGCCAGAGCGTAAATGGCGTACTGA-3'   | 5'-ATTGCGCCCGCTTACGCTCGGCGTTTG-3'      |
| PCE8011 | pdm1 blastoderm     | 3          | 2L        | 12,605,345 | 12,606,039 | 695      | 12,605,003            | 12,606,214          | 1,212               | 5'-TTAGGCGCGCCCATAGGTGAGTGCGAAAGGGT-3'   | 5'-ATTGCGCCCGTGTGCATCAGGTGTTAAGCCA-3'  |
| PCE8024 | ftz stripes 1/5     | 4          | 3R        | 2,693,713  | 2,694,405  | 693      | 2,693,266             | 2,694,697           | 1,432               | 5'-TTAGGCGCGCCAAATACAGTATGCGTCAGAA-3'    | 5'-ATTGCGCCCGCGCCAAACGACAGACTAA-3'     |
| PCE8012 | pdm2 neurogenic     | 5          | 2L        | 12,663,878 | 12,664,600 | 723      | 12,663,605            | 12,664,915          | 1,311               | 5'-TTAGGCGCGCCGAGTCCGTTGGTGTAGCG-3'      | 5'-ATTGCGCCCGCGGTTTATGGGCATTAGTTGG-3'  |
| PCE8027 | sqz neurogenic      | 6          | 3R        | 15,000,096 | 15,000,905 | 810      | 14,999,957            | 15,001,318          | 1,362               | 5'-TTAGGCGCGCCGCGGAATCAAACACTTAAC-3'     | 5'-ATTGCGCCCGAGATAAAACAATAACCGAAGG-3'  |
| PCE8005 | cluster_at_7A       | 7          | X         | 6,996,209  | 6,996,756  | 548      | 6,995,933             | 6,997,124           | 1,192               | 5'-TTAGGCGCGCCGCGCATTCGCGAGTATCCAA-3'    | 5'-ATTGCGCCCGCTGCGGCTTCTCCTTCGTAT-3'   |
| PCE8016 | cluster_at_55C      | 8          | 2R        | 13,354,407 | 13,355,109 | 703      | 13,354,069            | 13,355,591          | 1,523               | 5'-TTAGGCGCGCCAAGAAGACGCTGTGATTCG-3'     | 5'-ATTGCGCCCGCTGTTGCCGTTCCGATTC-3'     |
| PCE8020 | cluster_at_70F      | 9          | 3L        | 14,665,967 | 14,666,676 | 710      | 14,664,995            | 14,666,459          | 1,465               | 5'-TTAGGCGCGCGTTGACAGCCAGCCTAGATCC-3'    | 5'-ATTGCGCCCGCAGGCAAGCAGAAGCGAG-3'     |
| PCE8002 | cluster_at_4B       | 10         | X         | 4,124,119  | 4,125,459  | 1,341    | 4,123,730             | 4,125,859           | 2,130               | 5'-TTAGGCGCGCCTTTCACGACGAGGACGA-3'       | 5'-ATTGCGCCCGCGACAAGTGCGCCCATTA-3'     |
| PCE8003 | cluster_at_5C.1     | 11         | X         | 5,658,504  | 5,659,131  | 628      | 5,658,257             | 5,659,392           | 1,136               | 5'-TTAGGCGCGCCACACCAACTAGCGCACAG-3'      | 5'-ATTGCGCCCGCGTGTTCCTCGCCGAAGGTT-3'   |
| PCE8004 | cluster_at_5C.2     | 12         | X         | 5,674,913  | 5,675,606  | 694      | 5,674,716             | 5,675,960           | 1,245               | 5'-TTAGGCGCGCCAAATGGCATTTTCGCTGTTCC-3'   | 5'-ATTGCGCCCGCGCGGTTTGGCATAAA-3'       |
| PCE8006 | cluster_at_7B       | 13         | X         | 7,239,486  | 7,240,124  | 639      | 7,239,133             | 7,240,622           | 1,490               | 5'-TTAGGCGCGCCTGCTGCTATGCGGTGTAATTC-3'   | 5'-ATTGCGCCCGCTGCGTGTCCGTTAAACCA-3'    |
| PCE8007 | cluster_at_7F       | 14         | X         | 8,350,658  | 8,351,315  | 658      | 8,350,159             | 8,351,727           | 1,569               | 5'-TTAGGCGCGCCTAGCGTAGATTTTTAACCCAT-3'   | 5'-ATTGCGCCCGCGGAACACATTTGGGATATG-3'   |
| PCE8008 | cluster_at_8F       | 15         | X         | 9,457,631  | 9,458,375  | 745      | 9,457,472             | 9,458,697           | 1,226               | 5'-TTAGGCGCGCCACTCTCTGGAAGTGCAGAAACA-3'  | 5'-ATTGCGCCCGCTGGCCAAACGAACGA-3'       |
| PCE8009 | cluster_at_12E      | 16         | X         | 14,146,556 | 14,147,218 | 663      | 14,146,290            | 14,147,566          | 1,277               | 5'-TTAGGCGCGCCTATCCGAGCATCCGCCTAC-3'     | 5'-ATTGCGCCCGCGCGCAAGGACCTACCAAC-3'    |
| PCE8013 | cluster_at_34E      | 17         | 2L        | 13,989,283 | 13,990,132 | 850      | 13,989,186            | 13,990,523          | 1,338               | 5'-TTAGGCGCGCCAGTTGGCTTCGGGTGA-3'        | 5'-ATTGCGCCCGCGTGGCGATTCTAATTGTATGA-3' |
| PCE8014 | cluster_at_36F      | 18         | 2L        | 18,400,758 | 18,401,458 | 701      | 18,400,400            | 18,401,689          | 1,290               | 5'-TTAGGCGCGCCGCCAAACTCTCCCTAAACCA-3'    | 5'-ATTGCGCCCGCTAACAAATAAGCCGCAACG-3'   |
| PCE8015 | cluster_at_47A      | 19         | 2R        | 5,664,440  | 5,665,094  | 655      | 5,664,034             | 5,665,331           | 1,298               | 5'-TTAGGCGCGCCTGTAGATACACTTCGGTTTCC-3'   | 5'-ATTGCGCCCGCATGATGCCACATACTGAC-3'    |
| PCE8017 | cluster_at_56B      | 20         | 2R        | 14,266,629 | 14,267,261 | 633      | 14,266,335            | 14,267,714          | 1,380               | 5'-TTAGGCGCGCCAGTCTAATCTCGCCATA-3'       | 5'-ATTGCGCCCGCTCAGTCAAAGTTGTCCGCAT-3'  |
| PCE8018 | cluster_at_59B      | 21         | 2R        | 17,995,894 | 17,996,609 | 716      | 17,995,467            | 17,996,855          | 1,389               | 5'-TTAGGCGCGCCGCGCAGCGAAGTGGTCTCAATCT-3' | 5'-ATTGCGCCCGCGGCTGCACTTACGTTTCAC-3'   |
| PCE8019 | cluster_at_67B      | 22         | 3L        | 9,529,913  | 9,530,579  | 667      | 9,529,465             | 9,530,697           | 1,233               | 5'-TTAGGCGCGCCAAATCCGCAATGTAAGGTAT-3'    | 5'-ATTGCGCCCGCGGCGAAAGACAAGTAAA-3'     |
| PCE8021 | cluster_at_75C      | 23         | 3L        | 18,339,914 | 18,340,665 | 752      | 18,339,620            | 18,340,904          | 1,285               | 5'-TTAGGCGCGCCGAGCGAAGGATACAGGATCTA-3'   | 5'-ATTGCGCCCGCGCACAGTCCACTCGTAA-3'     |
| PCE8022 | cluster_at_76C      | 24         | 3L        | 19,594,180 | 19,594,883 | 704      | 19,594,141            | 19,595,365          | 1,225               | 5'-TTAGGCGCGCCGCGCAGGGAAGGTAAGTT-3'      | 5'-ATTGCGCCCGCACTTAATATGCACGGCGAGTG-3' |
| PCE8023 | cluster_at_84A      | 25         | 3R        | 2,595,162  | 2,595,926  | 765      | 2,595,080             | 2,596,370           | 1,291               | 5'-TTAGGCGCGCCGTTGCGGTTCTGTCTC-3'        | 5'-ATTGCGCCCGCAGTACTGTTGGCGATGG-3'     |
| PCE8025 | cluster_at_85C      | 26         | 3R        | 4,944,607  | 4,945,444  | 838      | 4,944,225             | 4,945,690           | 1,466               | 5'-TTAGGCGCGCCAAAGCCACAGAACTCGCATAC-3'   | 5'-ATTGCGCCCGCGCTTGAGAAATGTTTACCA-3'   |
| PCE8026 | cluster_at_88F      | 27         | 3R        | 11,424,315 | 11,424,996 | 682      | 11,423,952            | 11,425,201          | 1,250               | 5'-TTAGGCGCGCCTGTCTGCGACGAGTGTG-3'       | 5'-ATTGCGCCCGCAATAAGTGGCATCCCGTTGT-3'  |
| PCE8028 | cluster_at_95C      | 28         | 3R        | 19,757,908 | 19,758,531 | 624      | 19,757,427            | 19,758,699          | 1,273               | 5'-TTAGGCGCGCCGCATTCTGCGATTTCGTCT-3'     | 5'-ATTGCGCCCGCAACAAAGCCGAACGACA-3'     |
