# Supplementary material for: Computational identification of developmental enhancers: conservation and function of transcription factor binding-site clusters in Drosophila melanogaster and Drosophila pseudoobscura
Source: Springer Nature journal article supplement (doi:10.1186/gb-2004-5-9-r61), 2004-08-20
Supplement: Additional file 6 [file gb-2004-5-9-r61-s6.pdf]

| pCRM    | name                | BPB2002 Chrom |     | pCRM       |            |       | Alignment                            |        |             | Dpse len | Dmel noncoding bases | Dpse noncoding bases |           |
|---------|---------------------|---------------|-----|------------|------------|-------|--------------------------------------|--------|-------------|----------|----------------------|----------------------|-----------|
|         |                     | ID            | arm | pCRM start | pCRM end   | len   | D.pse scaffold                       | length | D.pse start |          |                      |                      | D.pse end |
| PCE7001 | runt stripe 3       |               | X   | 20,357,206 | 20,358,294 | 1,089 | Dpse_3212383_1_44815                 | 61,982 | 17,707      | 19,210   | 1,504                | 18,864               | 17,308    |
| PCE7002 | eve stripes 3/7     |               | 2R  | 5,035,494  | 5,036,771  | 1,278 | Dpse_3213009_3212129_1_42085         | 56,885 | 19,302      | 20,415   | 1,114                | 14,177               | 12,863    |
| PCE7003 | eve stripe 2        |               | 2R  | 5,038,454  | 5,039,040  | 587   | Dpse_3213009_3212129_1_41074         | 56,583 | 19,594      | 20,364   | 771                  | 14,959               | 14,824    |
| PCE7004 | eve stripes 4/6     |               | 2R  | 5,044,597  | 5,045,395  | 799   | Dpse_3213009_3212129_1_41218         | 56,239 | 21,774      | 22,776   | 1,003                | 15,405               | 12,863    |
| PCE7005 | hairy stripe 7      |               | 3L  | 8,624,351  | 8,625,245  | 895   | Dpse_3212377_1_51998                 | 62,992 | 24,614      | 25,482   | 869                  | 19,610               | 20,337    |
| PCE7006 | hairy stripe 6      |               | 3L  | 8,625,452  | 8,626,319  | 868   | Dpse_3212377_1_51998                 | 62,992 | 25,642      | 26,593   | 952                  | 19,509               | 19,782    |
| PCE7007 | hairy stripes 1,5   |               | 3L  | 8,629,180  | 8,629,966  | 787   | Dpse_3212377_1_52744                 | 63,742 | 26,928      | 27,650   | 723                  | 17,879               | 18,656    |
| PCE7008 | kni upstream        |               | 3L  | 20,615,070 | 20,616,425 | 1,356 | Dpse_3213110_1_51190                 | 61,930 | 23,760      | 25,413   | 1,654                | 17,207               | 16,065    |
| PCE7009 | hb HZ1.4            |               | 3R  | 4,526,315  | 4,527,521  | 1,207 | Dpse_3213225_3212440_1_37623         | 58,662 | 21,040      | 22,422   | 1,383                | 16,823               | 15,791    |
| PCE8001 | gt posterior domain | 1             | X   | 2,187,439  | 2,188,382  | 944   | Dpse_3212166_3212206_3213217_1_45443 | 62,659 | 16,447      | 17,538   | 1,092                | 17,609               | 16,370    |
| PCE8010 | odd stripes 3/6     | 2             | 2L  | 3,601,750  | 3,602,509  | 760   | Dpse_3213134_1_63579                 | 71,306 | 26,093      | 26,917   | 825                  | 17,010               | 28,745    |
| PCE8011 | pdm1 blastoderm     | 3             | 2L  | 12,605,345 | 12,606,039 | 695   | Dpse_3212646_1_58383                 | 66,165 | 28,248      | 29,141   | 894                  | 15,893               | 16,943    |
| PCE8024 | ftz stripes 1/5     | 4             | 3R  | 2,693,713  | 2,694,405  | 693   | Dpse_3212942_1_49671                 | 59,840 | 24,755      | 25,498   | 744                  | 18,242               | 16,659    |
| PCE8012 | pdm2 neurogenic     | 5             | 2L  | 12,663,878 | 12,664,600 | 723   | Dpse_3212646_3212123_3213189_1_68286 | 74,438 | 28,671      | 29,393   | 723                  | 15,638               | 18,408    |
| PCE8027 | sqz neurogenic      | 6             | 3R  | 15,000,096 | 15,000,905 | 810   | Dpse_3212786_3212587_1_36348         | 58,805 | 11,368      | 12,185   | 818                  | 13,520               | 11,955    |
| PCE8005 | cluster_at_7A       | 7             | X   | 6,996,209  | 6,996,756  | 548   | Dpse_3213012_1_61104                 | 69,604 | 28,638      | 29,456   | 819                  | 20,000               | 24,123    |
| PCE8016 | cluster_at_55C      | 8             | 2R  | 13,354,407 | 13,355,109 | 703   | Dpse_3212407_1_50564                 | 59,819 | 24,616      | 26,232   | 1,617                | 10,316               | 9,120     |
| PCE8020 | cluster_at_70F      | 9             | 3L  | 14,665,967 | 14,666,676 | 710   | Dpse_3213050_1_40411                 | 57,919 | 23,210      | 23,747   | 538                  | 20,000               | 16,281    |
| PCE8002 | cluster_at_4B       | 10            | X   | 4,124,119  | 4,125,459  | 1,341 | Dpse_3212444_1_57148                 | 69,031 | 27,381      | 27,452   | 72                   | 19,172               | 21,268    |
| PCE8003 | cluster_at_5C.1     | 11            | X   | 5,658,504  | 5,659,131  | 628   | Dpse_3208392_3212169_1_53199         | 81,985 | 28,460      | 28,588   | 129                  | 13,848               | 5,725     |
| PCE8004 | cluster_at_5C.2     | 12            | X   | 5,674,913  | 5,675,606  | 694   | Dpse_3215593_1_56294                 | 76,411 | 28,230      | 29,072   | 843                  | 16,052               | 13,136    |
| PCE8006 | cluster_at_7B       | 13            | X   | 7,239,486  | 7,240,124  | 639   | Dpse_3213012_1_57731                 | 69,290 | 25,639      | 26,301   | 663                  | 19,143               | 24,693    |
| PCE8007 | cluster_at_7F       | 14            | X   | 8,350,658  | 8,351,315  | 658   | Dpse_3213180_3212715_3211870_1_47844 | 61,404 | 24,542      | 24,670   | 129                  | 16,259               | 18,271    |
| PCE8008 | cluster_at_8F       | 15            | X   | 9,457,631  | 9,458,375  | 745   | Dpse_3212341_1_51935                 | 62,233 | 24,374      | 25,089   | 716                  | 20,000               | 19,255    |
| PCE8009 | cluster_at_12E      | 16            | X   | 14,146,556 | 14,147,218 | 663   | Dpse_3212152_1_43438                 | 64,357 | 24,716      | 25,353   | 638                  | 19,714               | 16,505    |
| PCE8013 | cluster_at_34E      | 17            | 2L  | 13,989,283 | 13,990,132 | 850   | Dpse_3211777_1_59057                 | 68,087 | 29,315      | 30,233   | 919                  | 18,451               | 23,991    |
| PCE8014 | cluster_at_36F      | 18            | 2L  | 18,400,758 | 18,401,458 | 701   | Dpse_3212190_1_56443                 | 73,446 | 23,823      | 24,418   | 596                  | 20,000               | 30,680    |
| PCE8015 | cluster_at_47A      | 19            | 2R  | 5,664,440  | 5,665,094  | 655   | Dpse_3213122_1_27515                 | 55,252 | 14,195      | 14,846   | 652                  | 17,429               | 15,278    |
| PCE8017 | cluster_at_56B      | 20            | 2R  | 14,266,629 | 14,267,261 | 633   | Dpse_3213226_3212141_1_38431         | 56,565 | 16,180      | 16,510   | 331                  | 19,579               | 18,004    |
| PCE8018 | cluster_at_59B      | 21            | 2R  | 17,995,894 | 17,996,609 | 716   | Dpse_3212648_1_45519                 | 61,494 | 21,221      | 22,180   | 960                  | 18,871               | 14,029    |
| PCE8019 | cluster_at_67B      | 22            | 3L  | 9,529,913  | 9,530,579  | 667   | Dpse_3212377_1_44926                 | 57,956 | 24,327      | 25,001   | 675                  | 19,664               | 15,627    |
| PCE8021 | cluster_at_75C      | 23            | 3L  | 18,339,914 | 18,340,665 | 752   | Dpse_3212212_1_56415                 | 67,137 | 31,359      | 31,998   | 640                  | 19,149               | 18,670    |
| PCE8022 | cluster_at_76C      | 24            | 3L  | 19,594,180 | 19,594,883 | 704   | Dpse_3213110_1_49535                 | 60,524 | 22,994      | 23,718   | 725                  | 14,158               | 14,759    |
| PCE8023 | cluster_at_84A      | 25            | 3R  | 2,595,162  | 2,595,926  | 765   | Dpse_3212942_3212942_1_46935         | 59,140 | 23,130      | 24,130   | 1,001                | 18,018               | 18,086    |
| PCE8025 | cluster_at_85C      | 26            | 3R  | 4,944,607  | 4,945,444  | 838   | Dpse_3213126_1_55976                 | 65,240 | 27,604      | 28,430   | 827                  | 20,000               | 24,088    |
| PCE8026 | cluster_at_88F      | 27            | 3R  | 11,424,315 | 11,424,996 | 682   | Dpse_3212649_1_45115                 | 63,991 | 28,504      | 29,599   | 1,096                | 20,000               | 15,310    |
| PCE8028 | cluster_at_95C      | 28            | 3R  | 19,757,908 | 19,758,531 | 624   | Dpse_3213015_3213015_3213215_1_54769 | 63,690 | 22,188      | 22,910   | 723                  | 13,089               | 20,012    |
