# Supplementary material for: Computational identification of developmental enhancers: conservation and function of transcription factor binding-site clusters in Drosophila melanogaster and Drosophila pseudoobscura
Source: Springer Nature journal article supplement (doi:10.1186/gb-2004-5-9-r61), 2004-08-20
Supplement: Additional file 7 [file gb-2004-5-9-r61-s7.pdf]

| CRM | Overlaps known element | Chrom arm              | pCRM start | pCRM end   | pCRM len   | 5' gene | pCRM relative position | 3' gene | pCRM relative position | Aligned sites | Aligned + preserved sites | Aligned site dens | Aligned + preserved site dens | z-score | Additional Gap/pair-rule gene within 20kb | pCRM relative position |
|-----|------------------------|------------------------|------------|------------|------------|---------|------------------------|---------|------------------------|---------------|---------------------------|-------------------|-------------------------------|---------|-------------------------------------------|------------------------|
| 1   | PCE8050                | hairly stripes 3/4,6,7 | 3L         | 8,622,879  | 8,626,839  | 3,961   | CG6486                 | +14646  | <b>h</b>               | -7829         | 36                        | 62                | 9                             | 16      | 20.1                                      |                        |
| 2   | PCE8051                | kni upstream           | 3L         | 20,614,714 | 20,617,020 | 2,307   | <b>kni</b>             | -813    | CG13253                | +20716        | 25                        | 31                | 11                            | 13      | 13.2                                      |                        |
| 3   | PCE8052                | pdm1 blastoderm        | 2L         | 12,604,311 | 12,606,913 | 2,603   | CG15488                | +1653   | <b>nub</b>             | -304          | 20                        | 33                | 8                             | 13      | 11.6                                      |                        |
| 4   | PCE8053                | eve stripes 3/7        | 2R         | 5,035,493  | 5,037,290  | 1,798   | CG12134                | +3712   | <b>eve</b>             | -2433         | 21                        | 24                | 12                            | 13      | 11.5                                      | Adam                   |
| 5   | PCE8054                | hairly stripes 1,5     | 3L         | 8,628,846  | 8,631,011  | 2,166   | CG6486                 | +20613  | <b>h</b>               | -3657         | 17                        | 29                | 8                             | 13      | 10.5                                      | +5901                  |
| 6   | PCE8055                | runt stripe 3          | X          | 20,356,848 | 20,360,054 | 3,207   | CG1338                 | -9192   | <b>run</b>             | -6801         | 17                        | 34                | 5                             | 11      | 10.3                                      |                        |
| 7   | PCE8056                |                        | X          | 20,323,964 | 20,326,397 | 2,434   | CG11692                | -12536  | Cyp6v1                 | -4186         | 16                        | 28                | 7                             | 12      | 9.6                                       |                        |
| 8   | PCE8057                | hb HZ1.4               | 3R         | 4,526,225  | 4,527,991  | 1,767   | <b>hb</b>              | -2670   | CG8112                 | +1273         | 17                        | 21                | 10                            | 12      | 9.5                                       |                        |
| 9   | PCE8059                | eve stripes 4/6        | 2R         | 5,044,597  | 5,046,030  | 1,434   | <b>eve</b>             | +4874   | TER94                  | -3763         | 15                        | 18                | 10                            | 13      | 9.0                                       | Adam                   |
| 10  | PCE8060                | gt posterior domain    | X          | 2,186,709  | 2,189,069  | 2,361   | <b>gt</b>              | -974    | tko                    | +11679        | 18                        | 21                | 8                             | 9       | 8.9                                       | +15005                 |
| 11  | PCE8061                |                        | X          | 3,169,806  | 3,172,348  | 2,543   | CG12535                | -17954  | CG14269                | +21857        | 13                        | 29                | 5                             | 11      | 8.8                                       |                        |
| 12  | PCE8063                | CE8021                 | 3L         | 18,339,914 | 18,341,941 | 2,028   | <b>grim</b>            | -86621  | <b>rpr</b>             | +5341         | 16                        | 20                | 8                             | 10      | 8.5                                       |                        |
| 13  | PCE8064                |                        | 3R         | 6,255,663  | 6,256,945  | 1,283   | CG6345                 | -13879  | Cyp12e1                | -3594         | 13                        | 17                | 10                            | 13      | 8.4                                       |                        |
| 14  | PCE8065                |                        | 3R         | 4,026,032  | 4,027,816  | 1,785   | <b>grn</b>             | -18853  | CG7800                 | -15898        | 15                        | 19                | 8                             | 11      | 8.4                                       |                        |
| 15  | PCE8066                |                        | X          | 20,348,460 | 20,352,624 | 4,165   | CG1338                 | -804    | <b>run</b>             | -14231        | 16                        | 28                | 4                             | 7       | 8.3                                       |                        |
| 16  | PCE8067                | ftz upstream (partial) | 3R         | 2,682,314  | 2,684,591  | 2,278   | <b>Scr</b>             | -7972   | <b>ftz</b>             | -5455         | 15                        | 22                | 7                             | 10      | 8.3                                       |                        |
| 17  | PCE8068                |                        | X          | 18,701,007 | 18,702,700 | 1,694   | CG32541                | +39691  | CG32541                | +39691        | 12                        | 22                | 7                             | 13      | 8.2                                       |                        |
| 18  | PCE8069                |                        | 2R         | 17,274,311 | 17,276,017 | 1,707   | CG3380                 | -2521   | dve                    | -11496        | 14                        | 19                | 8                             | 11      | 8.2                                       |                        |
| 19  | PCE8070                |                        | 2L         | 7,616,050  | 7,618,366  | 2,317   | CG6739                 | +15430  | CG13792                | +19862        | 14                        | 23                | 6                             | 10      | 8.1                                       |                        |
| 20  | PCE8071                | sqz neurogenic         | 3R         | 14,999,463 | 15,001,552 | 2,090   | sqz                    | -9504   | CG14282                | -1186         | 12                        | 24                | 6                             | 11      | 8.0                                       | nos                    |
| 21  | PCE8072                |                        | X          | 5,674,422  | 5,676,386  | 1,965   | CG3726                 | +16870  | CG12728                | -6597         | 11                        | 24                | 6                             | 12      | 7.8                                       | +16485                 |
| 22  | PCE8073                |                        | 2R         | 14,903,099 | 14,903,925 | 827     | Toll-7                 | +12482  | Obp56i                 | -27903        | 11                        | 11                | 13                            | 13      | 7.8                                       |                        |
| 23  | PCE8074                |                        | 3R         | 23,192,304 | 23,192,750 | 447     | CG13980                | +8073   | <b>side</b>            | +40862        | 7                         | 8                 | 16                            | 18      | 7.7                                       |                        |
| 24  | PCE8075                |                        | 3R         | 10,762,920 | 10,764,750 | 1,831   | CG3837                 | +18501  | CG14861                | -75759        | 13                        | 19                | 7                             | 10      | 7.6                                       |                        |
| 25  | PCE8076                | eve stripe 2           | 2R         | 5,038,454  | 5,039,041  | 588     | CG12134                | +6673   | <b>eve</b>             | -682          | 8                         | 10                | 14                            | 17      | 7.6                                       | Adam                   |
| 26  | PCE8077                |                        | 2L         | 13,541,662 | 13,542,651 | 990     | <b>kuz</b>             | +9371   | <b>kuz</b>             | +9371         | 11                        | 13                | 11                            | 13      | 7.6                                       | +8862                  |
| 27  | PCE8078                |                        | 2L         | 14,424,056 | 14,425,158 | 1,103   | BG:DS06238.4           | -16773  | BG:DS08340.1           | +7810         | 12                        | 13                | 11                            | 12      | 7.6                                       |                        |
| 28  | PCE8080                | odd stripes 3/6        | 2L         | 3,601,045  | 3,602,748  | 1,704   | <b>odd</b>             | -1728   | Dot                    | -9112         | 12                        | 19                | 7                             | 11      | 7.5                                       |                        |
| 29  | PCE8081                |                        | 3L         | 17,412,324 | 17,413,414 | 1,091   | CG18265                | +24035  | CG7603                 | -1413         | 11                        | 14                | 10                            | 13      | 7.5                                       |                        |
| 30  | PCE8083                |                        | 3L         | 14,121,556 | 14,123,127 | 1,572   | Sox21b                 | -41352  | <b>D</b>               | +4373         | 12                        | 17                | 8                             | 11      | 7.3                                       |                        |
| 31  | PCE8084                |                        | 2L         | 4,098,489  | 4,099,006  | 518     | <b>ed</b>              | +74542  | <b>ed</b>              | +74542        | 7                         | 9                 | 14                            | 17      | 7.3                                       |                        |
| 32  | PCE8085                |                        | 2R         | 12,253,766 | 12,255,302 | 1,537   | CG10953                | -23540  | CG10950                | -3625         | 13                        | 15                | 8                             | 10      | 7.2                                       |                        |
| 33  | PCE8086                |                        | 3L         | 20,612,647 | 20,614,073 | 1,427   | <b>kni</b>             | +1254   | CG13253                | +23663        | 11                        | 17                | 8                             | 12      | 7.2                                       |                        |
| 34  | PCE8087                |                        | 2R         | 3,391,037  | 3,391,561  | 525     | CG30358                | +10444  | CG14755                | -16724        | 7                         | 9                 | 13                            | 17      | 7.2                                       |                        |
| 35  | PCE8088                |                        | 3L         | 16,418,107 | 16,418,469 | 363     | CG33158                | +49435  | <b>argos</b>           | +14111        | 6                         | 6                 | 17                            | 17      | 7.2                                       |                        |
| 36  | PCE8089                |                        | 3R         | 12,368,159 | 12,368,687 | 529     | CG11769                | +28970  | CG31448                | -670          | 7                         | 9                 | 13                            | 17      | 7.2                                       | CG14889                |
| 37  | PCE8091                |                        | 3L         | 11,213,064 | 11,213,664 | 601     | scylla                 | +3224   | CG32083                | +24695        | 8                         | 9                 | 13                            | 15      | 7.1                                       | -13735                 |
| 38  | PCE8092                |                        | 2L         | 1,233,357  | 1,235,228  | 1,872   | CG5156                 | +3715   | CG5397                 | -6475         | 9                         | 23                | 5                             | 12      | 7.1                                       |                        |
| 39  | PCE8093                |                        | 3L         | 15,688,222 | 15,691,204 | 2,983   | <b>comm</b>            | -10920  | CG13445                | -67172        | 13                        | 22                | 4                             | 7       | 7.0                                       |                        |
| 40  | PCE8094                |                        | 2R         | 10,492,861 | 10,493,546 | 686     | CG30472                | -5321   | CG12959                | -26488        | 9                         | 9                 | 13                            | 13      | 7.0                                       |                        |
| 41  | PCE8095                |                        | 3R         | 23,894,562 | 23,895,459 | 898     | CG12870                | +31901  | CG12870                | +31901        | 10                        | 11                | 11                            | 12      | 7.0                                       |                        |
| 42  | PCE8096                |                        | 3L         | 6,762,543  | 6,765,157  | 2,615   | vvl                    | +12855  | Prat2                  | +108336       | 13                        | 20                | 5                             | 8       | 6.9                                       |                        |
| 43  | PCE8097                |                        | 3R         | 10,238,130 | 10,238,652 | 523     | CG14846                | -1983   | CG14847                | +4557         | 7                         | 8                 | 13                            | 15      | 6.8                                       |                        |
| 44  | PCE8099                |                        | 2L         | 18,305,051 | 18,306,251 | 1,201   | Fas3                   | +6868   | Fas3                   | +6868         | 10                        | 14                | 8                             | 12      | 6.7                                       |                        |
| 45  | PCE8100                | eve early APR          | 2R         | 5,042,174  | 5,042,884  | 711     | <b>eve</b>             | +2451   | TER94                  | -6909         | 8                         | 10                | 11                            | 14      | 6.7                                       | Adam                   |
| 46  | PCE8102                | til posterior          | 3R         | 26,663,942 | 26,665,204 | 1,263   | CG15544                | +21005  | <b>til</b>             | -2251         | 11                        | 13                | 9                             | 10      | 6.6                                       | +12582                 |
| 47  | PCE8104                | ems neurogenic         | 3R         | 9,723,602  | 9,724,936  | 1,335   | E5                     | -23682  | <b>ems</b>             | -2663         | 12                        | 12                | 9                             | 9       | 6.6                                       |                        |
| 48  | PCE8105                |                        | 3R         | 17,817,909 | 17,818,791 | 883     | Eip93F                 | +25598  | Eip93F                 | +25598        | 9                         | 11                | 10                            | 12      | 6.6                                       |                        |
| 49  | PCE8106                |                        | 3L         | 10,499,018 | 10,501,551 | 2,534   | CG32062                | +25485  | CG32062                | +25485        | 11                        | 21                | 4                             | 8       | 6.6                                       |                        |
| 50  | PCE8107                |                        | 3L         | 4,612,891  | 4,614,005  | 1,115   | CG13716                | -161    | CG13715                | +1681         | 11                        | 11                | 10                            | 10      | 6.6                                       |                        |
| 51  | PCE8108                |                        | 2L         | 14,403,771 | 14,404,937 | 1,167   | CG15284                | -4301   | BG:DS06238.4           | +2346         | 10                        | 13                | 9                             | 11      | 6.5                                       |                        |
| 52  | PCE8109                |                        | 3R         | 7,941,601  | 7,942,426  | 826     | CG31361                | +17775  | <b>CG4702</b>          | +11512        | 9                         | 10                | 11                            | 12      | 6.5                                       |                        |
| 53  | PCE8110                |                        | 2L         | 8,804,166  | 8,805,336  | 1,171   | CG9468                 | -30684  | <b>SoxN</b>            | -12519        | 10                        | 13                | 9                             | 11      | 6.5                                       |                        |
| 54  | PCE8111                |                        | 3L         | 8,612,337  | 8,613,016  | 680     | CG6486                 | +4104   | <b>h</b>               | -21652        | 8                         | 9                 | 12                            | 13      | 6.5                                       |                        |
| 55  | PCE8112                |                        | 3L         | 4,377,989  | 4,379,208  | 1,220   | CG7447                 | +13842  | Syx17                  | -3984         | 11                        | 12                | 9                             | 10      | 6.5                                       |                        |
| 56  | PCE8113                |                        | 2L         | 14,113,291 | 14,113,893 | 603     | CG15292                | -3974   | CG31768                | -6693         | 7                         | 9                 | 12                            | 15      | 6.5                                       |                        |
| 57  | PCE8114                |                        | 3L         | 3,997,600  | 3,998,923  | 1,324   | CG14985                | +13500  | fd64A                  | -799          | 11                        | 13                | 8                             | 10      | 6.5                                       |                        |
| 58  | PCE8115                | eve stripe 1           | 2R         | 5,046,559  | 5,047,297  | 739     | <b>eve</b>             | +6836   | TER94                  | -2496         | 8                         | 10                | 11                            | 14      | 6.5                                       | Adam                   |
| 59  | PCE8116                |                        | 2R         | 16,921,501 | 16,922,240 | 740     | CG13493                | -11091  | PpN58A                 | +4194         | 8                         | 10                | 11                            | 14      | 6.5                                       | +16967                 |
| 60  | PCE8118                |                        | 3R         | 14,822,848 | 14,823,484 | 637     | <b>gukh</b>            | +13085  | <b>gukh</b>            | +13085        | 8                         | 8                 | 13                            | 13      | 6.4                                       |                        |
| 61  | PCE8119                |                        | 3R         | 12,671,525 | 12,672,987 | 1,463   | <b>abd-A</b>           | -15737  | CG10349                | -32477        | 11                        | 14                | 8                             | 10      | 6.4                                       |                        |
| 62  | PCE8120                |                        | 3L         | 10,492,688 | 10,495,539 | 2,852   | CG32062                | +19155  | CG32062                | +19155        | 10                        | 23                | 4                             | 8       | 6.4                                       |                        |
| 63  | PCE8121                |                        | 2L         | 16,841,696 | 16,842,392 | 697     | CG6012                 | -2193   | CG31781                | -5178         | 8                         | 9                 | 11                            | 13      | 6.4                                       |                        |

| CRM | Overlaps known element | Chrom arm       | pCRM start | pCRM end   | pCRM len | 5' gene                   | pCRM relative position | 3' gene             | pCRM relative position | Aligned sites | Aligned + preserved sites | Aligned site dens | Aligned + preserved site dens | z-score | Additional Gap/pair-rule gene within 20kb | pCRM relative position |
|-----|------------------------|-----------------|------------|------------|----------|---------------------------|------------------------|---------------------|------------------------|---------------|---------------------------|-------------------|-------------------------------|---------|-------------------------------------------|------------------------|
| 64  | PCE8122                | 3L              | 6,885,832  | 6,887,436  | 1,605    | Prat2                     | -11445                 | CG14820             | -5022                  | 11            | 15                        | 7                 | 9                             | 6.4     |                                           |                        |
| 65  | PCE8123                | 2L              | 15,162,778 | 15,164,524 | 1,747    | BG:DS03192.2              | -6373                  | BG:DS07295.1        | +59479                 | 11            | 16                        | 6                 | 9                             | 6.4     |                                           |                        |
| 66  | PCE8124                | 2R              | 6,888,483  | 6,889,700  | 1,218    | CG12443                   | +13963                 | CG13192             | -428                   | 10            | 13                        | 8                 | 11                            | 6.4     |                                           |                        |
| 67  | PCE8125                | 2L              | 20,466,022 | 20,467,708 | 1,687    | CG2493                    | -32831                 | CG15476             | +4184                  | 10            | 17                        | 6                 | 10                            | 6.4     |                                           |                        |
| 68  | PCE8126                | 3L              | 2,779,198  | 2,779,658  | 461      | CG2083                    | +1101                  | CG2083              | +1101                  | 6             | 7                         | 13                | 15                            | 6.3     |                                           |                        |
| 69  | PCE8127                | X               | 4,630,473  | 4,632,106  | 1,634    | CG12681                   | +14179                 | CG15470             | -3196                  | 9             | 18                        | 6                 | 11                            | 6.3     |                                           |                        |
| 70  | PCE8128                | 3R              | 27,713,381 | 27,715,087 | 1,707    | heph                      | +35171                 | heph                | +35171                 | 10            | 17                        | 6                 | 10                            | 6.3     |                                           |                        |
| 71  | PCE8130                | 3R              | 12,383,752 | 12,385,269 | 1,518    | <b>CG14889</b>            | +1858                  | <b>CG14889</b>      | +1858                  | 11            | 14                        | 7                 | 9                             | 6.3     |                                           |                        |
| 72  | PCE8131                | 3R              | 21,329,716 | 21,331,058 | 1,343    | CG5111                    | +8355                  | msi                 | -2351                  | 8             | 17                        | 6                 | 13                            | 6.3     |                                           |                        |
| 73  | PCE8132                | 3R              | 16,242,660 | 16,243,128 | 469      | CG10881                   | +8657                  | CG17208             | +20535                 | 6             | 7                         | 13                | 15                            | 6.3     |                                           |                        |
| 74  | PCE8133                | 3R              | 24,120,296 | 24,122,240 | 1,945    | CG12516                   | -668                   | larp                | +19112                 | 12            | 15                        | 6                 | 8                             | 6.2     |                                           |                        |
| 75  | PCE8134                | 3L              | 8,733,754  | 8,734,394  | 641      | <u>CG32030</u>            | +8601                  | <u>CG32030</u>      | +8601                  | 7             | 9                         | 11                | 14                            | 6.2     |                                           |                        |
| 76  | PCE8135                | X               | 17,716,817 | 17,717,958 | 1,142    | Sh                        | +3615                  | Sh                  | +3615                  | 9             | 13                        | 8                 | 11                            | 6.2     |                                           |                        |
| 77  | PCE8137                | 3R              | 12,053,627 | 12,055,472 | 1,846    | tara                      | +2239                  | tara                | +2239                  | 10            | 17                        | 5                 | 9                             | 6.1     |                                           |                        |
| 78  | PCE8138                | X               | 7,396,751  | 7,398,239  | 1,489    | ct                        | +24149                 | ct                  | +24149                 | 9             | 16                        | 6                 | 11                            | 6.1     |                                           |                        |
| 79  | PCE8139                | 2R              | 6,573,169  | 6,574,383  | 1,215    | inv                       | +32752                 | CG30034             | +12378                 | 10            | 12                        | 8                 | 10                            | 6.1     | en                                        | +19407                 |
| 80  | PCE8140                | 2R              | 15,167,055 | 15,168,270 | 1,216    | CG16898                   | -98356                 | 18w                 | -6952                  | 10            | 12                        | 8                 | 10                            | 6.1     |                                           |                        |
| 81  | PCE8141                | 3R              | 10,893,081 | 10,893,688 | 608      | CG12601                   | -3999                  | <u>CG31114</u>      | +9257                  | 7             | 8                         | 12                | 13                            | 6.1     |                                           |                        |
| 82  | PCE8142                | 3R              | 9,911,719  | 9,912,536  | 818      | foxo                      | +29007                 | CG3153              | -2727                  | 8             | 10                        | 10                | 12                            | 6.1     |                                           |                        |
| 83  | PCE8144                | 3L              | 3,503,831  | 3,504,156  | 326      | Eip63E                    | +7518                  | Eip63E              | +7518                  | 4             | 6                         | 12                | 18                            | 6.1     | ImpE2                                     | -10525                 |
| 84  | PCE8145                | 3R              | 4,536,237  | 4,536,936  | 700      | <u>CG8112</u>             | +1795                  | <u>CG8112</u>       | +1795                  | 8             | 8                         | 11                | 11                            | 6.0     | hb                                        | -12682                 |
| 85  | PCE8146                | 2R              | 16,824,156 | 16,825,175 | 1,020    | CG4021                    | +7261                  | lox2                | +10031                 | 9             | 11                        | 9                 | 11                            | 6.0     |                                           |                        |
| 86  | PCE8147                | 2L              | 4,145,728  | 4,147,090  | 1,363    | CG2955                    | +3881                  | Or24a               | +11580                 | 8             | 16                        | 6                 | 12                            | 6.0     |                                           |                        |
| 87  | PCE8148                | 2L              | 11,942,898 | 11,943,920 | 1,023    | CG16964                   | +6063                  | CG17745             | -11559                 | 9             | 11                        | 9                 | 11                            | 6.0     |                                           |                        |
| 88  | PCE8149                | 2R              | 18,266,546 | 18,267,656 | 1,111    | CG3162                    | -11439                 | CG3092              | -8537                  | 9             | 12                        | 8                 | 11                            | 6.0     |                                           |                        |
| 89  | PCE8150                | 3R              | 6,379,567  | 6,380,474  | 908      | hth                       | +50936                 | hth                 | +50936                 | 8             | 11                        | 9                 | 12                            | 6.0     |                                           |                        |
| 90  | PCE8151                | 2L              | 15,776,939 | 15,777,643 | 705      | BG:DS02252.3              | +14601                 | BG:DS02252.4        | +36049                 | 6             | 11                        | 9                 | 16                            | 6.0     |                                           |                        |
| 91  | PCE8152                | 2L              | 16,363,535 | 16,364,908 | 1,374    | BG:DS09218.5              | +19533                 | <b>BG:DS02780.1</b> | +61641                 | 8             | 16                        | 6                 | 12                            | 6.0     |                                           |                        |
| 92  | PCE8153                | 2L              | 754,034    | 754,662    | 629      | Eaat2                     | -121                   | GABA-B-R3           | -121                   | 7             | 8                         | 11                | 13                            | 5.9     |                                           |                        |
| 93  | PCE8154                | 2R              | 14,014,526 | 14,016,536 | 2,011    | sano                      | +3479                  | sano                | +3479                  | 10            | 17                        | 5                 | 8                             | 5.9     |                                           |                        |
| 94  | PCE8155                | X               | 2,143,383  | 2,144,016  | 634      | <u>EG:BACH7M4.1</u>       | +420                   | <u>EG:BACH7M4.1</u> | +420                   | 7             | 8                         | 11                | 13                            | 5.9     |                                           |                        |
| 95  | PCE8156                | 3R              | 7,009,831  | 7,010,437  | 607      | Ugt86Dh                   | +8520                  | CG18577             | -11408                 | 6             | 9                         | 10                | 15                            | 5.9     |                                           |                        |
| 96  | PCE8158                | 2R              | 18,241,861 | 18,243,915 | 2,055    | CG13539                   | +13886                 | CG3162              | +11192                 | 10            | 17                        | 5                 | 8                             | 5.9     |                                           |                        |
| 97  | PCE8159                | 3R              | 22,414,628 | 22,415,746 | 1,119    | <u>CG5467</u>             | +1870                  | <u>CG5467</u>       | +1870                  | 10            | 10                        | 9                 | 9                             | 5.9     |                                           |                        |
| 98  | PCE8160                | 2L              | 14,699,578 | 14,700,407 | 830      | BG:DS07721.3              | +4759                  | BG:DS07721.6        | +10594                 | 7             | 11                        | 8                 | 13                            | 5.9     |                                           |                        |
| 99  | PCE8161                | 3R              | 11,285,379 | 11,285,970 | 592      | <u>CG14869</u>            | +16554                 | CG31297             | -5441                  | 5             | 10                        | 8                 | 17                            | 5.8     |                                           |                        |
| 100 | PCE8162                | 2L              | 5,444,551  | 5,445,324  | 774      | CG31647                   | -3134                  | CG6634              | -8531                  | 7             | 10                        | 9                 | 13                            | 5.8     |                                           |                        |
| 101 | PCE8163                | 2L              | 11,333,117 | 11,334,119 | 1,003    | CG14926                   | -983                   | salr                | -20056                 | 9             | 10                        | 9                 | 10                            | 5.8     |                                           |                        |
| 102 | PCE8164                | 2L              | 8,839,488  | 8,841,115  | 1,628    | SoxN                      | +21633                 | CG32986             | -13922                 | 10            | 14                        | 6                 | 9                             | 5.8     |                                           |                        |
| 103 | PCE8165                | X               | 8,390,109  | 8,392,075  | 1,967    | oc                        | -513                   | CG12772             | -23984                 | 10            | 16                        | 5                 | 8                             | 5.8     |                                           |                        |
| 104 | PCE8166                | 3R              | 12,570,467 | 12,571,123 | 657      | Ubx                       | -10101                 | CG31275             | +5951                  | 7             | 8                         | 11                | 12                            | 5.7     |                                           |                        |
| 105 | PCE8167                | Ubx S1          | 12,589,099 | 12,589,755 | 657      | <b>CG31275 (Ubx adj.)</b> | -11970                 | Glut3               | -24295                 | 7             | 8                         | 11                | 12                            | 5.7     |                                           |                        |
| 106 | PCE8168                | 3R              | 22,448,085 | 22,448,743 | 659      | CG5476                    | +1126                  | CG31080             | -77                    | 7             | 8                         | 11                | 12                            | 5.7     |                                           |                        |
| 107 | PCE8169                | ftz stripes 1/5 | 2,693,336  | 2,694,915  | 1,580    | ftz                       | +3290                  | Antp                | +63624                 | 11            | 12                        | 7                 | 8                             | 5.7     |                                           |                        |
| 108 | PCE8170                | 3R              | 2,670,658  | 2,672,242  | 1,585    | Scr                       | +2100                  | Scr                 | +2100                  | 9             | 15                        | 6                 | 9                             | 5.7     | ftz                                       | -19388                 |
| 109 | PCE8171                | X               | 1,302,444  | 1,303,108  | 665      | EG:196F3.2                | +31949                 | EG:56G7.1           | +11836                 | 7             | 8                         | 11                | 12                            | 5.7     |                                           |                        |
| 110 | PCE8172                | 3L              | 18,399,768 | 18,400,890 | 1,123    | skl                       | -10952                 | CG32196             | +8305                  | 9             | 11                        | 8                 | 10                            | 5.7     |                                           |                        |
| 111 | PCE8173                | 3R              | 9,681,376  | 9,682,499  | 1,124    | CG14362                   | -186                   | E5                  | +17421                 | 9             | 11                        | 8                 | 10                            | 5.7     |                                           |                        |
| 112 | PCE8174                | 3L              | 11,293,375 | 11,294,546 | 1,172    | CG6168                    | -14124                 | CG6163              | +27871                 | 8             | 13                        | 7                 | 11                            | 5.7     |                                           |                        |
| 113 | PCE8175                | 2R              | 18,095,222 | 18,095,804 | 583      | twi                       | +5547                  | CG30194             | -3259                  | 6             | 8                         | 10                | 14                            | 5.7     |                                           |                        |
| 114 | PCE8176                | X               | 17,123,624 | 17,125,668 | 2,045    | B-H2                      | +78085                 | B-H1                | -2791                  | 10            | 16                        | 5                 | 8                             | 5.7     |                                           |                        |
| 115 | PCE8177                | 2R              | 5,634,520  | 5,635,604  | 1,085    | psq                       | +4661                  | psq                 | +4661                  | 8             | 12                        | 7                 | 11                            | 5.7     |                                           |                        |
| 116 | PCE8178                | 3R              | 4,940,064  | 4,941,355  | 1,292    | pum                       | +41733                 | pum                 | +41733                 | 8             | 14                        | 6                 | 11                            | 5.7     |                                           |                        |
| 117 | PCE8179                | 2L              | 1,211,417  | 1,212,502  | 1,086    | CG14342                   | +5436                  | CG14343             | -8526                  | 8             | 12                        | 7                 | 11                            | 5.7     |                                           |                        |
| 118 | PCE8180                | 3R              | 26,349,418 | 26,350,118 | 701      | spdo                      | +1448                  | spdo                | +1448                  | 6             | 10                        | 9                 | 14                            | 5.7     |                                           |                        |
| 119 | PCE8182                | 3R              | 15,393,929 | 15,394,541 | 613      | Dys                       | +64400                 | CG7344              | -409                   | 5             | 10                        | 8                 | 16                            | 5.6     |                                           |                        |
| 120 | PCE8183                | 2L              | 7,305,525  | 7,305,940  | 416      | wg                        | +4205                  | wg                  | +4205                  | 5             | 6                         | 12                | 14                            | 5.6     |                                           |                        |
| 121 | PCE8184                | 3R              | 3,135,927  | 3,137,173  | 1,247    | m                         | -1859                  | CG32468             | +3477                  | 9             | 12                        | 7                 | 10                            | 5.6     |                                           |                        |
| 122 | PCE8185                | 3R              | 710,838    | 711,575    | 738      | CG14660                   | -6584                  | Gnf1                | -20769                 | 7             | 9                         | 9                 | 12                            | 5.6     |                                           |                        |
| 123 | PCE8186                | 3L              | 8,453,917  | 8,454,507  | 591      | CG6902                    | -896                   | CG6694              | +13950                 | 6             | 8                         | 10                | 14                            | 5.6     |                                           |                        |
| 124 | PCE8187                | 2L              | 8,286,022  | 8,287,399  | 1,378    | <b>Btk29A</b>             | +5904                  | <b>Btk29A</b>       | +5904                  | 9             | 13                        | 7                 | 9                             | 5.6     |                                           |                        |
| 125 | PCE8188                | 3L              | 22,062,292 | 22,063,071 | 780      | msopa                     | +62207                 | CG15374             | -19633                 | 8             | 8                         | 10                | 10                            | 5.6     |                                           |                        |
| 126 | PCE8189                | 2R              | 6,792,459  | 6,794,046  | 1,588    | CG13194                   | +3824                  | CG13193             | -39119                 | 10            | 13                        | 6                 | 8                             | 5.6     |                                           |                        |

| CRM | Overlaps known element | Chrom arm | pCRM start | pCRM end   | pCRM len | 5' gene                   | pCRM relative position | 3' gene        | pCRM relative position | Aligned sites | Aligned + preserved sites | Aligned site dens | Aligned + preserved site dens | z-score | Additional Gap/pair-rule gene within 20kb | pCRM relative position |
|-----|------------------------|-----------|------------|------------|----------|---------------------------|------------------------|----------------|------------------------|---------------|---------------------------|-------------------|-------------------------------|---------|-------------------------------------------|------------------------|
| 127 | PCE8190                | 3L        | 6,589,453  | 6,590,721  | 1,269    | <b>Glu-RI</b>             | +5891                  | <b>Glu-RI</b>  | +5891                  | 9             | 12                        | 7                 | 9                             | 5.6     |                                           |                        |
| 128 | PCE8191                | 3L        | 1,385,892  | 1,386,270  | 379      | CG32320                   | +6660                  | CG9168         | -5584                  | 5             | 5                         | 13                | 13                            | 5.6     |                                           |                        |
| 129 | PCE8192                | 3R        | 23,242,393 | 23,243,019 | 627      | side                      | -8781                  | CG13978        | -36256                 | 7             | 7                         | 11                | 11                            | 5.6     |                                           |                        |
| 130 | PCE8193                | 2R        | 20,268,656 | 20,269,940 | 1,285    | CG9380                    | -36249                 | <b>Kr</b>      | -244                   | 7             | 15                        | 5                 | 12                            | 5.5     |                                           |                        |
| 131 | PCE8194                | 3R        | 23,969,559 | 23,970,425 | 867      | CG12425                   | +7648                  | CG4787         | -79761                 | 8             | 9                         | 9                 | 10                            | 5.5     |                                           |                        |
| 132 | PCE8195                | 3L        | 5,126,445  | 5,126,805  | 361      | <b>CG32423</b>            | +17297                 | <b>CG32423</b> | +17297                 | 4             | 6                         | 11                | 17                            | 5.5     |                                           |                        |
| 133 | PCE8196                | 3L        | 2,826,468  | 2,828,094  | 1,627    | CG2083                    | -45709                 | CG14952        | +430                   | 10            | 13                        | 6                 | 8                             | 5.5     |                                           |                        |
| 134 | PCE8197                | 2L        | 16,126,643 | 16,128,124 | 1,482    | BG:DS04095.3              | -11046                 | Ca-alpha1D     | -20616                 | 8             | 15                        | 5                 | 10                            | 5.5     |                                           |                        |
| 135 | PCE8198                | 2L        | 3,767,311  | 3,769,396  | 2,086    | <b>bow1</b>               | +2110                  | <b>bow1</b>    | +2110                  | 9             | 17                        | 4                 | 8                             | 5.5     |                                           |                        |
| 136 | PCE8199                | 3L        | 15,431,502 | 15,432,168 | 667      | CG7804                    | -8513                  | ran-like       | +2113                  | 6             | 9                         | 9                 | 13                            | 5.5     |                                           |                        |
| 137 | PCE8200                | 2L        | 15,548,655 | 15,549,454 | 800      | BG:DS04862.2              | +20100                 | kek3           | -7582                  | 6             | 11                        | 8                 | 14                            | 5.5     |                                           |                        |
| 138 | PCE8201                | 2L        | 5,380,416  | 5,381,185  | 770      | nompC                     | +41609                 | H15            | -15371                 | 7             | 9                         | 9                 | 12                            | 5.5     |                                           |                        |
| 139 | PCE8202                | 2L        | 2,624,801  | 2,625,854  | 1,054    | CG15395                   | +22089                 | CG9962         | +14358                 | 8             | 11                        | 8                 | 10                            | 5.5     |                                           |                        |
| 140 | PCE8203                | 2R        | 14,009,681 | 14,010,690 | 1,010    | <b>sano</b>               | +333                   | <b>sano</b>    | +333                   | 7             | 12                        | 7                 | 12                            | 5.5     |                                           |                        |
| 141 | PCE8204                | 3L        | 12,572,530 | 12,573,035 | 506      | <b>caup</b>               | +4858                  | <b>caup</b>    | +4858                  | 6             | 6                         | 12                | 12                            | 5.5     |                                           |                        |
| 142 | PCE8205                | 2R        | 7,062,819  | 7,064,497  | 1,679    | CG8298                    | +8959                  | otk            | +20040                 | 10            | 13                        | 6                 | 8                             | 5.5     |                                           |                        |
| 143 | PCE8206                | 3R        | 21,617,170 | 21,618,622 | 1,453    | CG31093                   | -11612                 | CG5024         | -7560                  | 7             | 16                        | 5                 | 11                            | 5.5     |                                           |                        |
| 144 | PCE8207                | X         | 7,355,969  | 7,356,818  | 850      | <b>ct</b>                 | +6445                  | <b>ct</b>      | +6445                  | 7             | 10                        | 8                 | 12                            | 5.4     |                                           |                        |
| 145 | PCE8208                | 2L        | 11,844,176 | 11,844,657 | 482      | CG14935                   | +4999                  | CG14943        | +3564                  | 5             | 7                         | 10                | 15                            | 5.4     |                                           |                        |
| 146 | PCE8209                | 3R        | 14,292,390 | 14,295,410 | 3,021    | <b>fru</b>                | +30861                 | <b>fru</b>     | +30861                 | 9             | 20                        | 3                 | 7                             | 5.4     |                                           |                        |
| 147 | PCE8210                | 3L        | 7,925,371  | 7,926,049  | 679      | <b>exex</b>               | +17651                 | RNaseX25       | -4074                  | 6             | 9                         | 9                 | 13                            | 5.4     |                                           |                        |
| 148 | PCE8212                | 3L        | 10,490,647 | 10,491,985 | 1,339    | <b>CG32062</b>            | +17114                 | <b>CG32062</b> | +17114                 | 7             | 15                        | 5                 | 11                            | 5.4     |                                           |                        |
| 149 | PCE8214                | 2L        | 12,601,146 | 12,602,225 | 1,080    | ref2                      | -895                   | CG15488        | -433                   | 8             | 11                        | 7                 | 10                            | 5.4     | <b>nub</b>                                | -6071                  |
| 150 | PCE8215                | 2L        | 1,262,811  | 1,263,598  | 788      | <b>robo3</b>              | +4320                  | <b>robo3</b>   | +4320                  | 7             | 9                         | 9                 | 11                            | 5.4     |                                           |                        |
| 151 | PCE8216                | 3L        | 2,124,879  | 2,125,504  | 626      | CG11952                   | -2146                  | CG11953        | +5214                  | 6             | 8                         | 10                | 13                            | 5.4     |                                           |                        |
| 152 | PCE8217                | 3L        | 6,427,171  | 6,428,277  | 1,107    | CG14910                   | +5977                  | CG14911        | -15304                 | 8             | 11                        | 7                 | 10                            | 5.3     |                                           |                        |
| 153 | PCE8218                | 2L        | 10,545,226 | 10,547,197 | 1,972    | <b>CG31721</b>            | +7937                  | <b>CG31721</b> | +7937                  | 10            | 14                        | 5                 | 7                             | 5.3     |                                           |                        |
| 154 | PCE8219                | 2L        | 20,565,501 | 20,566,968 | 1,468    | CG15477                   | +51119                 | CG31677        | +6970                  | 8             | 14                        | 5                 | 10                            | 5.3     |                                           |                        |
| 155 | PCE8220                | 3L        | 11,285,342 | 11,286,077 | 736      | CG6168                    | -6091                  | CG6163         | +36340                 | 7             | 8                         | 10                | 11                            | 5.3     |                                           |                        |
| 156 | PCE8221                | 2R        | 7,617,876  | 7,619,748  | 1,873    | <b>fra</b>                | +24108                 | CG30056        | -7049                  | 7             | 18                        | 4                 | 10                            | 5.3     |                                           |                        |
| 157 | PCE8222                | 2L        | 5,405,877  | 5,406,553  | 677      | <b>H15</b>                | +9321                  | <b>H15</b>     | +9321                  | 7             | 7                         | 10                | 10                            | 5.3     |                                           |                        |
| 158 | PCE8223                | 2R        | 4,530,951  | 4,532,251  | 1,301    | CG13953                   | +12280                 | <b>Camta</b>   | +142                   | 9             | 11                        | 7                 | 8                             | 5.3     |                                           |                        |
| 159 | PCE8224                | 2L        | 13,051,685 | 13,052,501 | 817      | CG9932                    | -31482                 | CG31856        | +10214                 | 5             | 12                        | 6                 | 15                            | 5.3     |                                           |                        |
| 160 | PCE8225                | 3R        | 18,797,064 | 18,797,775 | 712      | CG17244                   | +3416                  | Or94a          | -5883                  | 6             | 9                         | 8                 | 13                            | 5.3     |                                           |                        |
| 161 | PCE8226                | 2L        | 12,541,433 | 12,542,145 | 713      | <b>bun</b>                | -11992                 | CG15489        | -40512                 | 6             | 9                         | 8                 | 13                            | 5.2     |                                           |                        |
| 162 | PCE8228                | 3R        | 22,644,179 | 22,644,773 | 595      | <b>II</b>                 | +30050                 | <b>II</b>      | +30050                 | 6             | 7                         | 10                | 12                            | 5.2     |                                           |                        |
| 163 | PCE8229                | X         | 18,648,038 | 18,649,904 | 1,867    | CG7378                    | +16671                 | CG32541        | -11412                 | 6             | 19                        | 3                 | 10                            | 5.2     |                                           |                        |
| 164 | PCE8230                | 3R        | 26,522,426 | 26,523,531 | 1,106    | CG31010                   | -1245                  | CG1340         | -17643                 | 9             | 9                         | 8                 | 8                             | 5.2     |                                           |                        |
| 165 | PCE8231                | 3L        | 14,206,111 | 14,206,767 | 657      | CG7906                    | +20508                 | <b>fz</b>      | -16459                 | 6             | 8                         | 9                 | 12                            | 5.2     |                                           |                        |
| 166 | PCE8232                | 3R        | 18,053,073 | 18,054,179 | 1,107    | <b>CG31163</b>            | +40454                 | <b>CG31163</b> | +40454                 | 9             | 9                         | 8                 | 8                             | 5.2     |                                           |                        |
| 167 | PCE8233                | 2L        | 20,451,718 | 20,452,478 | 761      | CG2493                    | -18527                 | CG15476        | +19414                 | 7             | 8                         | 9                 | 11                            | 5.2     |                                           |                        |
| 168 | PCE8234                | 2L        | 9,337,120  | 9,337,956  | 837      | CG3748                    | +1891                  | CG13110        | -4755                  | 7             | 9                         | 8                 | 11                            | 5.2     |                                           |                        |
| 169 | PCE8235                | X         | 2,190,216  | 2,191,697  | 1,482    | <b>gt</b>                 | -4481                  | <b>tko</b>     | +9051                  | 9             | 12                        | 6                 | 8                             | 5.2     |                                           |                        |
| 170 | PCE8237                | 2L        | 12,670,755 | 12,671,417 | 663      | <b>pdm2</b>               | +3280                  | <b>pdm2</b>    | +3280                  | 6             | 8                         | 9                 | 12                            | 5.2     |                                           |                        |
| 171 | PCE8239                | 3R        | 1,972,623  | 1,973,690  | 1,068    | CG1076                    | +24245                 | CG31563        | -5208                  | 8             | 10                        | 7                 | 9                             | 5.2     |                                           |                        |
| 172 | PCE8240                | 3R        | 12,696,513 | 12,697,212 | 700      | <b>abd-A</b>              | -40725                 | CG10349        | -8252                  | 7             | 10                        | 10                | 10                            | 5.1     |                                           |                        |
| 173 | PCE8242                | 3L        | 6,855,809  | 6,857,382  | 1,574    | <b>vvl</b>                | +106121                | Prat2          | +16111                 | 8             | 14                        | 5                 | 9                             | 5.1     |                                           |                        |
| 174 | PCE8243                | 2L        | 16,895,393 | 16,896,128 | 736      | CG4841                    | +6632                  | beat-IIIb      | -66610                 | 6             | 9                         | 8                 | 12                            | 5.1     |                                           |                        |
| 175 | PCE8244                | 2R        | 6,785,122  | 6,787,280  | 2,159    | CG13195                   | -17960                 | CG13194        | -1355                  | 10            | 14                        | 5                 | 6                             | 5.1     |                                           |                        |
| 176 | PCE8245                | 3L        | 6,438,623  | 6,439,396  | 774      | CG14910                   | +17429                 | CG14911        | -4185                  | 7             | 8                         | 9                 | 10                            | 5.1     |                                           |                        |
| 177 | PCE8246                | 3L        | 7,838,003  | 7,839,579  | 1,577    | <b>CG32365</b>            | +9431                  | <b>CG32365</b> | +9431                  | 6             | 17                        | 4                 | 11                            | 5.1     |                                           |                        |
| 178 | PCE8247                | 3R        | 15,388,862 | 15,389,498 | 637      | <b>Dys</b>                | +59333                 | CG7344         | -5452                  | 5             | 9                         | 8                 | 14                            | 5.1     |                                           |                        |
| 179 | PCE8248                | 2L        | 19,448,998 | 19,450,673 | 1,676    | CG10034                   | +6154                  | CG10195        | +12112                 | 9             | 13                        | 5                 | 8                             | 5.1     |                                           |                        |
| 180 | PCE8249                | 3R        | 26,129,302 | 26,130,442 | 1,141    | <b>hdc</b>                | +36281                 | <b>hdc</b>     | +36281                 | 9             | 9                         | 8                 | 8                             | 5.1     |                                           |                        |
| 181 | PCE8251                | 3R        | 9,382,257  | 9,382,780  | 524      | CG31337                   | -11132                 | CG14370        | -31147                 | 5             | 7                         | 10                | 13                            | 5.1     |                                           |                        |
| 182 | PCE8252                | X         | 7,380,962  | 7,382,647  | 1,686    | <b>ct</b>                 | +8360                  | <b>ct</b>      | +8360                  | 7             | 16                        | 4                 | 9                             | 5.1     |                                           |                        |
| 183 | PCE8253                | 2L        | 18,416,318 | 18,417,309 | 992      | CG31749                   | +51922                 | RpS26          | +3903                  | 6             | 12                        | 6                 | 12                            | 5.1     |                                           |                        |
| 184 | PCE8254                | X         | 20,873,939 | 20,874,492 | 554      | CG14579                   | +8229                  | CG1724         | +1262                  | 6             | 11                        | 11                | 11                            | 5.1     |                                           |                        |
| 185 | PCE8255                | ubx PBX   | 12,598,962 | 12,599,746 | 785      | <b>CG31275 (Ubx adj.)</b> | -21833                 | Glut3          | -14304                 | 7             | 8                         | 9                 | 10                            | 5.1     |                                           |                        |
| 186 | PCE8257                | 3L        | 11,233,121 | 11,234,915 | 1,795    | <b>scylla</b>             | +23281                 | CG32083        | +3444                  | 8             | 15                        | 4                 | 8                             | 5.1     |                                           |                        |
| 187 | PCE8258                | 3L        | 15,491,385 | 15,492,925 | 1,541    | <b>CrebA</b>              | +7093                  | <b>CrebA</b>   | +7093                  | 7             | 15                        | 5                 | 10                            | 5.1     |                                           |                        |
| 188 | PCE8259                | 3R        | 27,171,619 | 27,172,891 | 1,273    | <b>CG11339</b>            | +5461                  | <b>CG11339</b> | +5461                  | 9             | 10                        | 7                 | 8                             | 5.1     |                                           |                        |
| 189 | PCE8260                | 3R        | 4,252,683  | 4,253,299  | 617      | Obp85a                    | -2161                  | <b>CG31369</b> | +16263                 | 6             | 7                         | 10                | 11                            | 5.1     |                                           |                        |

| CRM | Overlaps known element | Chrom arm | pCRM start | pCRM end   | pCRM len | 5' gene       | pCRM relative position | 3' gene       | pCRM relative position | Aligned sites | Aligned + preserved sites | Aligned + preserved site dens | z-score | Additional Gap/pair-rule gene within 20kb | pCRM relative position |
|-----|------------------------|-----------|------------|------------|----------|---------------|------------------------|---------------|------------------------|---------------|---------------------------|-------------------------------|---------|-------------------------------------------|------------------------|
| 190 | PCE8261                | 2R        | 8,190,874  | 8,191,590  | 717      | CG13325       | +9856                  | CG3955        | +2178                  | 7             | 7                         | 10                            | 10      | 5.1                                       |                        |
| 191 | PCE8263                | X         | 11,976,692 | 11,977,374 | 683      | Ten-a         | +16005                 | Ten-a         | +16005                 | 6             | 8                         | 9                             | 12      | 5.1                                       |                        |
| 192 | PCE8264                | 3R        | 2,558,396  | 2,559,114  | 719      | CG31481       | -19647                 | zen2          | +10749                 | 7             | 7                         | 10                            | 10      | 5.1                                       |                        |
| 193 | PCE8267                | X         | 19,555,634 | 19,556,194 | 561      | CG11942       | -675                   | CG11940       | +23219                 | 6             | 6                         | 11                            | 11      | 5.0                                       |                        |
| 194 | PCE8268                | 2L        | 12,139,561 | 12,140,905 | 1,345    | CG31760       | +7907                  | CG31760       | +7907                  | 6             | 15                        | 4                             | 11      | 5.0                                       |                        |
| 195 | PCE8269                | 2L        | 1,835,449  | 1,836,676  | 1,228    | CG15623       | -1227                  | CG31665       | -7987                  | 8             | 11                        | 7                             | 9       | 5.0                                       |                        |
| 196 | PCE8270                | 3L        | 16,421,730 | 16,422,846 | 1,117    | argos         | +9734                  | argos         | +9734                  | 8             | 10                        | 7                             | 9       | 5.0                                       |                        |
| 197 | PCE8271                | 2R        | 14,861,230 | 14,861,852 | 623      | Obp56g        | -13497                 | Obp56h        | -17437                 | 6             | 7                         | 10                            | 11      | 5.0                                       |                        |
| 198 | PCE8272                | 3R        | 24,056,635 | 24,057,259 | 625      | CG12852       | +3761                  | CG16918       | -39531                 | 6             | 7                         | 10                            | 11      | 5.0                                       |                        |
| 199 | PCE8273                | 3L        | 13,607,859 | 13,609,095 | 1,237    | bru-3         | +15222                 | bru-3         | +15222                 | 8             | 11                        | 6                             | 9       | 5.0                                       |                        |
| 200 | PCE8274                | 2R        | 7,902,167  | 7,902,858  | 692      | CG17580       | +30777                 | Cyp9h1        | +4377                  | 6             | 8                         | 9                             | 12      | 5.0                                       |                        |
| 201 | PCE8275                | 3L        | 18,329,419 | 18,330,261 | 843      | grim          | -76126                 | rpr           | +17021                 | 6             | 10                        | 7                             | 12      | 5.0                                       |                        |
| 202 | PCE8276                | 3R        | 26,479,187 | 26,480,315 | 1,129    | CG15541       | +14933                 | CG1342        | -25416                 | 8             | 10                        | 7                             | 9       | 5.0                                       |                        |
| 203 | PCE8277                | 3R        | 6,448,750  | 6,449,993  | 1,244    | hth           | +8759                  | hth           | +8759                  | 6             | 14                        | 5                             | 11      | 5.0                                       |                        |
| 204 | PCE8278                | 3R        | 25,283,631 | 25,284,260 | 630      | Ptp99A        | +6731                  | Ptp99A        | +6731                  | 6             | 7                         | 10                            | 11      | 5.0                                       |                        |
| 205 | PCE8279                | 2R        | 15,932,538 | 15,933,268 | 731      | otp           | +7859                  | otp           | +7859                  | 5             | 10                        | 7                             | 14      | 5.0                                       |                        |
| 206 | PCE8280                | X         | 7,236,210  | 7,238,303  | 2,094    | CG11368       | +43626                 | CG32719       | +14917                 | 10            | 13                        | 5                             | 6       | 5.0                                       |                        |
| 207 | PCE8281                | 2L        | 3,877,335  | 3,878,714  | 1,380    | capu          | +2679                  | capu          | +2679                  | 6             | 15                        | 4                             | 11      | 5.0                                       |                        |
| 208 | PCE8282                | 2R        | 10,657,299 | 10,657,963 | 665      | CG8204        | -19583                 | CG30465       | -12028                 | 5             | 9                         | 8                             | 14      | 5.0                                       |                        |
| 209 | PCE8283                | 2L        | 12,193,053 | 12,193,686 | 634      | CG6579        | -26296                 | aret          | -1027                  | 6             | 7                         | 9                             | 11      | 5.0                                       |                        |
| 210 | PCE8284                | 3R        | 18,033,444 | 18,034,110 | 667      | CG5732        | +4935                  | CG31163       | +60523                 | 5             | 9                         | 7                             | 13      | 5.0                                       |                        |
| 211 | PCE8285                | 2L        | 17,682,342 | 17,683,045 | 704      | CadN          | +34559                 | CadN          | +34559                 | 6             | 8                         | 9                             | 11      | 4.9                                       |                        |
| 212 | PCE8286                | 3R        | 25,392,093 | 25,392,797 | 705      | Dr            | +20619                 | CG7567        | +10391                 | 6             | 8                         | 9                             | 11      | 4.9                                       |                        |
| 213 | PCE8287                | 3R        | 27,129,709 | 27,130,860 | 1,152    | CG11340       | -9539                  | CG11339       | -35298                 | 8             | 10                        | 7                             | 9       | 4.9                                       |                        |
| 214 | PCE8290                | X         | 13,858,700 | 13,859,698 | 999      | CG12454       | +58500                 | CG32614       | -3018                  | 7             | 10                        | 7                             | 10      | 4.9                                       |                        |
| 215 | PCE8292                | 2L        | 14,441,774 | 14,442,414 | 641      | BG:DS08340.1  | -8806                  | noc           | -30599                 | 6             | 7                         | 9                             | 11      | 4.9                                       |                        |
| 216 | PCE8293                | 2L        | 5,932,279  | 5,932,988  | 710      | dsf           | +14128                 | Gpdh          | -2908                  | 6             | 8                         | 8                             | 11      | 4.9                                       |                        |
| 217 | PCE8294                | 3R        | 11,438,518 | 11,440,000 | 1,483    | CG18516       | -60006                 | CG5302        | -18622                 | 5             | 17                        | 3                             | 11      | 4.9                                       |                        |
| 218 | PCE8295                | 3L        | 16,111,912 | 16,113,071 | 1,160    | CG5151        | -14299                 | CG13073       | +49908                 | 6             | 13                        | 5                             | 11      | 4.9                                       |                        |
| 219 | PCE8296                | 3R        | 8,984,274  | 8,985,768  | 1,495    | timeout       | +69883                 | timeout       | +69883                 | 9             | 11                        | 6                             | 7       | 4.9                                       |                        |
| 220 | PCE8297                | 2R        | 20,280,374 | 20,281,018 | 645      | Kr            | +10190                 | CG30429       | -9080                  | 6             | 7                         | 9                             | 11      | 4.9                                       |                        |
| 221 | PCE8298                | 3L        | 10,192,663 | 10,193,451 | 789      | CG32056       | -9894                  | Or67c         | +8784                  | 6             | 9                         | 8                             | 11      | 4.9                                       |                        |
| 222 | PCE8300                | X         | 7,141,490  | 7,142,043  | 554      | CG1677        | +4647                  | CG15035       | +1508                  | 5             | 7                         | 9                             | 13      | 4.9                                       |                        |
| 223 | PCE8301                | X         | 20,408,532 | 20,409,828 | 1,297    | CG1324        | -157                   | CG15452       | +8536                  | 6             | 14                        | 5                             | 11      | 4.9                                       |                        |
| 224 | PCE8302                | X         | 12,212,589 | 12,213,655 | 1,067    | CG15926       | +10262                 | CG2560        | -3977                  | 6             | 12                        | 6                             | 11      | 4.9                                       |                        |
| 225 | PCE8304                | 2R        | 18,532,044 | 18,532,694 | 651      | CG18678       | +3454                  | CG13556       | -711                   | 6             | 7                         | 9                             | 11      | 4.9                                       |                        |
| 226 | PCE8305                | 3R        | 24,029,896 | 24,030,267 | 372      | CG12425       | +67985                 | CG4787        | -19919                 | 4             | 5                         | 11                            | 13      | 4.9                                       |                        |
| 227 | PCE8306                | 3L        | 12,278,550 | 12,279,346 | 797      | CG4328        | -28041                 | CG32105       | -7436                  | 6             | 9                         | 8                             | 11      | 4.9                                       |                        |
| 228 | PCE8307                | 3L        | 5,580,997  | 5,581,649  | 653      | CG12756       | -13449                 | CG5249        | -8641                  | 6             | 7                         | 9                             | 11      | 4.9                                       |                        |
| 229 | PCE8308                | 3L        | 6,976,211  | 6,978,322  | 2,112    | CG33171       | +2558                  | CG33171       | +2558                  | 9             | 14                        | 4                             | 7       | 4.9                                       |                        |
| 230 | PCE8309                | 2L        | 3,825,809  | 3,827,419  | 1,611    | slp1          | +7561                  | slp2          | -1991                  | 8             | 13                        | 5                             | 8       | 4.9                                       |                        |
| 231 | PCE8310                | X         | 20,516,785 | 20,517,812 | 1,028    | CG12678       | -18024                 | CG1314        | +24000                 | 7             | 10                        | 7                             | 10      | 4.8                                       |                        |
| 232 | PCE8311                | 3L        | 21,301,637 | 21,302,831 | 1,195    | BcDNA:GH11973 | +1838                  | BcDNA:GH11973 | +1838                  | 8             | 10                        | 7                             | 8       | 4.8                                       |                        |
| 233 | PCE8312                | 3R        | 21,186,737 | 21,187,932 | 1,196    | Fur1          | +101406                | CG11910       | +11247                 | 8             | 10                        | 7                             | 8       | 4.8                                       |                        |
| 234 | PCE8314                | 2L        | 3,842,537  | 3,843,621  | 1,085    | slp2          | +13127                 | CG3964        | -11628                 | 6             | 12                        | 6                             | 11      | 4.8                                       |                        |
| 235 | PCE8315                | 3L        | 918,940    | 920,143    | 1,204    | Glut1         | +20147                 | Glut1         | +20147                 | 8             | 10                        | 7                             | 8       | 4.8                                       |                        |
| 236 | PCE8317                | 3L        | 14,832,855 | 14,834,580 | 1,726    | CG17839       | +78724                 | CG13467       | -18412                 | 9             | 12                        | 5                             | 7       | 4.8                                       |                        |
| 237 | PCE8318                | 3R        | 13,029,447 | 13,030,254 | 808      | CG4090        | -43762                 | CG31262       | +14915                 | 6             | 9                         | 7                             | 11      | 4.8                                       |                        |
| 238 | PCE8319                | 2L        | 11,240,184 | 11,241,449 | 1,266    | ab            | +37095                 | CG32830       | -1995                  | 7             | 12                        | 6                             | 9       | 4.8                                       |                        |
| 239 | PCE8320                | 2L        | 2,004,674  | 2,005,266  | 593      | CG15354       | -49                    | CG15353       | +3592                  | 4             | 9                         | 7                             | 15      | 4.8                                       |                        |
| 240 | PCE8321                | 3R        | 17,803,291 | 17,803,917 | 627      | CG31353       | -7506                  | Eip93F        | +11606                 | 5             | 8                         | 8                             | 13      | 4.8                                       |                        |
| 241 | PCE8322                | 3R        | 8,658,121  | 8,658,685  | 565      | CG31345       | -15351                 | beat-Va       | +10626                 | 5             | 7                         | 9                             | 12      | 4.8                                       |                        |
| 242 | PCE8323                | 3R        | 22,463,533 | 22,464,267 | 735      | CG14243       | +8421                  | CG14248       | +2409                  | 6             | 8                         | 8                             | 11      | 4.8                                       |                        |
| 243 | PCE8324                | 2L        | 4,046,505  | 4,047,548  | 1,044    | ed            | +22558                 | ed            | +22558                 | 7             | 10                        | 7                             | 10      | 4.8                                       |                        |
| 244 | PCE8325                | 2L        | 5,752,282  | 5,753,225  | 944      | CG11030       | +35410                 | CG11142       | +5131                  | 5             | 12                        | 5                             | 13      | 4.8                                       |                        |
| 245 | PCE8326                | X         | 20,410,563 | 20,411,780 | 1,218    | CG1324        | -2188                  | CG15452       | +6584                  | 8             | 10                        | 7                             | 8       | 4.8                                       |                        |
| 246 | PCE8327                | 3R        | 17,959,744 | 17,960,442 | 699      | CG31163       | +9201                  | CG31163       | +9201                  | 5             | 9                         | 7                             | 13      | 4.8                                       |                        |
| 247 | PCE8328                | 2L        | 16,418,533 | 16,419,580 | 1,048    | BG:DS02780.1  | +8016                  | ldgf1         | -3783                  | 7             | 10                        | 7                             | 10      | 4.8                                       |                        |
| 248 | PCE8329                | X         | 7,008,925  | 7,009,873  | 949      | CG1958        | +1645                  | CG1677        | +16697                 | 7             | 9                         | 7                             | 9       | 4.8                                       |                        |
| 249 | PCE8330                | 3L        | 647,371    | 647,938    | 568      | Rev1          | +12382                 | CG17129       | +12961                 | 5             | 7                         | 9                             | 12      | 4.8                                       |                        |
| 250 | PCE8331                | 3L        | 5,582,709  | 5,583,340  | 632      | CG12756       | -15161                 | CG5249        | -6950                  | 5             | 8                         | 8                             | 13      | 4.8                                       |                        |
| 251 | PCE8332                | 3R        | 2,725,376  | 2,726,195  | 820      | Antp          | +32344                 | Antp          | +32344                 | 6             | 9                         | 7                             | 11      | 4.8                                       |                        |
| 252 | PCE8333                | 3R        | 17,237,677 | 17,238,345 | 669      | lbl           | +12464                 | lbl           | +12464                 | 6             | 7                         | 9                             | 10      | 4.8                                       |                        |

| CRM | Overlaps known element | Chrom arm | pCRM start | pCRM end   | pCRM len | 5' gene              | pCRM relative position | 3' gene              | pCRM relative position | Aligned sites | Aligned + preserved sites | Aligned + preserved site dens | z-score | Additional Gap/pair-rule gene within 20kb | pCRM relative position |
|-----|------------------------|-----------|------------|------------|----------|----------------------|------------------------|----------------------|------------------------|---------------|---------------------------|-------------------------------|---------|-------------------------------------------|------------------------|
| 253 | PCE8334                | 2R        | 12,893,261 | 12,894,492 | 1,232    | <u>grh</u>           | +1837                  | <u>grh</u>           | +1837                  | 8             | 10                        | 6                             | 8       | 4.8                                       |                        |
| 254 | PCE8335                | 3L        | 14,237,854 | 14,239,634 | 1,781    | <u>fz</u>            | +14600                 | <u>fz</u>            | +14600                 | 9             | 12                        | 5                             | 7       | 4.8                                       |                        |
| 255 | PCE8336                | 3R        | 15,506,370 | 15,507,007 | 638      | <u>CG31216</u>       | +9171                  | <u>CG31216</u>       | +9171                  | 5             | 8                         | 8                             | 13      | 4.7                                       |                        |
| 256 | PCE8337                | 2R        | 17,333,048 | 17,334,170 | 1,123    | <u>dve</u>           | +45535                 | <u>CG5819</u>        | -2839                  | 6             | 12                        | 5                             | 11      | 4.7                                       |                        |
| 257 | PCE8338                | 3R        | 3,987,824  | 3,989,532  | 1,709    | <u>grn</u>           | +17647                 | <u>grn</u>           | +17647                 | 8             | 13                        | 5                             | 8       | 4.7                                       |                        |
| 258 | PCE8339                | 3R        | 8,778,516  | 8,780,328  | 1,813    | <u>BcDNA:LD41548</u> | +7048                  | <u>BcDNA:LD41548</u> | +7048                  | 9             | 12                        | 5                             | 7       | 4.7                                       |                        |
| 259 | PCE8340                | 3L        | 4,840,194  | 4,841,268  | 1,075    | <u>CG17150</u>       | +794                   | <u>CG17150</u>       | +794                   | 7             | 10                        | 7                             | 9       | 4.7                                       |                        |
| 260 | PCE8341                | 3L        | 13,561,767 | 13,562,378 | 612      | <u>bru-3</u>         | +61939                 | <u>bru-3</u>         | +61939                 | 6             | 6                         | 10                            | 10      | 4.7                                       |                        |
| 261 | PCE8342                | 3L        | 7,797,257  | 7,798,139  | 883      | <u>Pdp1</u>          | +4655                  | <u>Pdp1</u>          | +4655                  | 7             | 8                         | 8                             | 9       | 4.7                                       |                        |
| 262 | PCE8343                | 2L        | 13,598,988 | 13,600,068 | 1,081    | <u>kuz</u>           | +66697                 | <u>kuz</u>           | +66697                 | 7             | 10                        | 6                             | 9       | 4.7                                       |                        |
| 263 | PCE8344                | 2L        | 9,054,174  | 9,054,891  | 718      | <u>CG31708</u>       | +5902                  | <u>CG31708</u>       | +5902                  | 5             | 9                         | 7                             | 13      | 4.7                                       |                        |
| 264 | PCE8345                | 2L        | 16,619,155 | 16,620,782 | 1,628    | <u>CG31738</u>       | +14416                 | <u>CG31738</u>       | +14416                 | 5             | 17                        | 3                             | 10      | 4.7                                       |                        |
| 265 | PCE8346                | 2L        | 12,569,943 | 12,571,337 | 1,395    | <u>bun</u>           | -40502                 | <u>CG15489</u>       | -11320                 | 6             | 14                        | 4                             | 10      | 4.7                                       |                        |
| 266 | PCE8347                | X         | 7,198,428  | 7,200,261  | 1,834    | <u>CG11368</u>       | +5844                  | <u>CG32719</u>       | +52959                 | 9             | 12                        | 5                             | 7       | 4.7                                       |                        |
| 267 | PCE8348                | 3L        | 18,966,181 | 18,967,380 | 1,200    | <u>nkd</u>           | +26830                 | <u>nkd</u>           | +26830                 | 7             | 11                        | 6                             | 9       | 4.7                                       |                        |
| 268 | PCE8349                | X         | 8,505,435  | 8,506,838  | 1,404    | <u>Lim1</u>          | +37936                 | <u>Lim1</u>          | +37936                 | 8             | 11                        | 6                             | 8       | 4.7                                       |                        |
| 269 | PCE8350                | 3L        | 2,812,397  | 2,813,478  | 1,082    | <u>CG2083</u>        | -31638                 | <u>CG14952</u>       | +15046                 | 5             | 13                        | 5                             | 12      | 4.7                                       |                        |
| 270 | PCE8351                | 2L        | 19,619,536 | 19,620,568 | 1,033    | <u>Lar</u>           | +30044                 | <u>Lar</u>           | +30044                 | 6             | 11                        | 6                             | 11      | 4.7                                       |                        |
| 271 | PCE8352                | 2L        | 14,836,647 | 14,837,731 | 1,085    | <u>BG:DS03431.1</u>  | -6814                  | <u>CG4480</u>        | +12375                 | 5             | 13                        | 5                             | 12      | 4.7                                       |                        |
| 272 | PCE8353                | 3L        | 408,630    | 409,181    | 552      | <u>trh</u>           | -50684                 | <u>CG13891</u>       | +5339                  | 4             | 8                         | 7                             | 14      | 4.7                                       |                        |
| 273 | PCE8354                | 2L        | 7,266,538  | 7,267,472  | 935      | <u>Wnt4</u>          | +1927                  | <u>Wnt4</u>          | +1927                  | 6             | 10                        | 6                             | 11      | 4.7                                       |                        |
| 274 | PCE8355                | 3R        | 6,421,647  | 6,422,583  | 937      | <u>hth</u>           | +8827                  | <u>hth</u>           | +8827                  | 6             | 10                        | 6                             | 11      | 4.7                                       |                        |
| 275 | PCE8356                | 3L        | 22,244,275 | 22,244,894 | 620      | <u>Ten-m</u>         | +80890                 | <u>CG32450</u>       | -2161                  | 6             | 6                         | 10                            | 10      | 4.7                                       |                        |
| 276 | PCE8357                | 3R        | 13,066,783 | 13,068,448 | 1,666    | <u>beat-11b</u>      | +5165                  | <u>beat-11b</u>      | +5165                  | 9             | 11                        | 5                             | 7       | 4.7                                       |                        |
| 277 | PCE8358                | 3R        | 26,740,914 | 26,742,495 | 1,582    | <u>Ptx1</u>          | +2496                  | <u>Ptx1</u>          | +2496                  | 8             | 12                        | 5                             | 8       | 4.7                                       |                        |
| 278 | PCE8359                | 3R        | 3,961,949  | 3,962,994  | 1,046    | <u>CG7891</u>        | +9599                  | <u>grn</u>           | +44185                 | 8             | 8                         | 8                             | 8       | 4.7                                       |                        |
| 279 | PCE8360                | 3R        | 11,566,576 | 11,567,198 | 623      | <u>CG31461</u>       | +20324                 | <u>CG4520</u>        | -3195                  | 6             | 6                         | 10                            | 10      | 4.6                                       |                        |
| 280 | PCE8361                | Ubx BRE   | 12,526,665 | 12,527,949 | 1,285    | <u>Ubx</u>           | +32417                 | <u>Ubx</u>           | +32417                 | 6             | 13                        | 5                             | 10      | 4.6                                       |                        |
| 281 | PCE8362                | X         | 670,447    | 671,138    | 692      | <u>CG11663</u>       | +18529                 | <u>EG:BACR7A4.19</u> | +13862                 | 4             | 10                        | 6                             | 14      | 4.6                                       |                        |
| 282 | PCE8363                | 3R        | 8,168,121  | 8,170,217  | 2,097    | <u>CG10013</u>       | +18858                 | <u>CG10038</u>       | +6133                  | 5             | 19                        | 2                             | 9       | 4.6                                       |                        |
| 283 | PCE8364                | 2L        | 3,951,733  | 3,952,895  | 1,163    | <u>fred</u>          | -12004                 | <u>CG15422</u>       | -44729                 | 6             | 12                        | 5                             | 10      | 4.6                                       |                        |
| 284 | PCE8365                | 3R        | 13,929,707 | 13,930,440 | 734      | <u>sr</u>            | +13168                 | <u>sr</u>            | +13168                 | 5             | 9                         | 7                             | 12      | 4.6                                       |                        |
| 285 | PCE8367                | 2R        | 4,771,288  | 4,771,881  | 594      | <u>CG10459</u>       | +3018                  | <u>dap</u>           | -1074                  | 5             | 7                         | 8                             | 12      | 4.6                                       |                        |
| 286 | PCE8368                | 3R        | 16,057,342 | 16,058,157 | 816      | <u>CG31209</u>       | +6389                  | <u>CG31209</u>       | +6389                  | 5             | 10                        | 6                             | 12      | 4.6                                       |                        |
| 287 | PCE8369                | 3L        | 14,540,753 | 14,541,382 | 630      | <u>HGTX</u>          | +7066                  | <u>HGTX</u>          | +7066                  | 6             | 6                         | 10                            | 10      | 4.6                                       |                        |
| 288 | PCE8370                | 3L        | 2,395,158  | 2,396,393  | 1,236    | <u>CG13800</u>       | +12412                 | <u>CG32306</u>       | -13538                 | 5             | 14                        | 4                             | 11      | 4.6                                       |                        |
| 289 | PCE8371                | 3L        | 6,879,258  | 6,879,960  | 703      | <u>Prat2</u>         | -4871                  | <u>CG14820</u>       | -12498                 | 6             | 7                         | 9                             | 10      | 4.6                                       |                        |
| 290 | PCE8373                | 3R        | 13,397,033 | 13,398,583 | 1,551    | <u>CG18139</u>       | +3343                  | <u>CG7587</u>        | -21576                 | 9             | 10                        | 6                             | 6       | 4.6                                       |                        |
| 291 | PCE8376                | 3R        | 21,352,808 | 21,354,366 | 1,559    | <u>msi</u>           | +19399                 | <u>msi</u>           | +19399                 | 7             | 13                        | 4                             | 8       | 4.6                                       |                        |
| 292 | PCE8377                | X         | 14,416,809 | 14,417,729 | 921      | <u>CG5321</u>        | +6191                  | <u>NetB</u>          | +62559                 | 5             | 11                        | 5                             | 12      | 4.6                                       |                        |
| 293 | PCE8378                | 3L        | 5,114,119  | 5,116,458  | 2,340    | <u>Srp54k</u>        | +2242                  | <u>CG32423</u>       | +27644                 | 8             | 15                        | 3                             | 6       | 4.6                                       |                        |
| 294 | PCE8379                | 2R        | 19,431,133 | 19,431,614 | 482      | <u>mAcR-60C</u>      | +1666                  | <u>mAcR-60C</u>      | +1666                  | 5             | 5                         | 10                            | 10      | 4.6                                       |                        |
| 295 | PCE8380                | 3R        | 9,636,667  | 9,638,244  | 1,578    | <u>CG14363</u>       | -19947                 | <u>Mst87F</u>        | +15207                 | 9             | 10                        | 6                             | 6       | 4.5                                       |                        |
| 296 | PCE8381                | 3L        | 2,143,526  | 2,144,132  | 607      | <u>CG15822</u>       | +357                   | <u>CG15822</u>       | +357                   | 5             | 7                         | 8                             | 12      | 4.5                                       |                        |
| 297 | PCE8382                | 2L        | 12,271,853 | 12,272,460 | 608      | <u>aret</u>          | +3635                  | <u>aret</u>          | +3635                  | 5             | 7                         | 8                             | 12      | 4.5                                       |                        |
| 298 | PCE8383                | 3R        | 11,464,046 | 11,464,759 | 714      | <u>CG5302</u>        | +5424                  | <u>CG5302</u>        | +5424                  | 4             | 10                        | 6                             | 14      | 4.5                                       |                        |
| 299 | PCE8385                | 3R        | 13,941,480 | 13,942,158 | 679      | <u>sr</u>            | +5776                  | <u>sr</u>            | +5776                  | 5             | 8                         | 7                             | 12      | 4.5                                       |                        |
| 300 | PCE8386                | 2L        | 18,751,913 | 18,752,630 | 718      | <u>CG31753</u>       | +1827                  | <u>CG31753</u>       | +1827                  | 6             | 7                         | 8                             | 10      | 4.5                                       |                        |
| 301 | PCE8388                | 3L        | 1,256,948  | 1,257,837  | 890      | <u>CG32333</u>       | +348                   | <u>CG32333</u>       | +348                   | 6             | 9                         | 7                             | 10      | 4.5                                       |                        |
| 302 | PCE8389                | 3R        | 22,312,308 | 22,312,955 | 648      | <u>CG6490</u>        | -19138                 | <u>scrib</u>         | -38477                 | 6             | 6                         | 9                             | 9       | 4.5                                       |                        |
| 303 | PCE8390                | 3L        | 1,902,800  | 1,903,522  | 723      | <u>CG13925</u>       | +757                   | <u>CG12361</u>       | -1426                  | 6             | 7                         | 8                             | 10      | 4.5                                       |                        |
| 304 | PCE8391                | 3L        | 5,254,002  | 5,254,895  | 894      | <u>CG32423</u>       | -16750                 | <u>lama</u>          | +55892                 | 6             | 9                         | 7                             | 10      | 4.5                                       |                        |
| 305 | PCE8392                | 2L        | 18,320,177 | 18,321,340 | 1,164    | <u>Fas3</u>          | +21994                 | <u>Fas3</u>          | +21994                 | 7             | 10                        | 6                             | 9       | 4.5                                       |                        |
| 306 | PCE8393                | 2L        | 4,084,125  | 4,084,704  | 580      | <u>ed</u>            | +60178                 | <u>ed</u>            | +60178                 | 4             | 8                         | 7                             | 14      | 4.5                                       |                        |
| 307 | PCE8394                | Kr 730    | 20,266,323 | 20,267,047 | 725      | <u>CG9380</u>        | -33916                 | <u>Kr</u>            | -3137                  | 6             | 7                         | 8                             | 10      | 4.5                                       |                        |
| 308 | PCE8395                | 3R        | 10,157,629 | 10,158,244 | 616      | <u>spn-B</u>         | +3825                  | <u>NK7.1</u>         | +34788                 | 5             | 7                         | 8                             | 11      | 4.5                                       |                        |
| 309 | PCE8396                | X         | 7,288,765  | 7,290,792  | 2,028    | <u>CG32720</u>       | -11499                 | <u>CG11369</u>       | -24182                 | 7             | 15                        | 3                             | 7       | 4.5                                       |                        |
| 310 | PCE8397                | 3R        | 11,505,261 | 11,506,493 | 1,233    | <u>pxb</u>           | +13336                 | <u>pxb</u>           | -4216                  | 6             | 12                        | 5                             | 10      | 4.5                                       |                        |
| 311 | PCE8398                | 3R        | 2,770,846  | 2,771,901  | 1,056    | <u>Antp</u>          | +12307                 | <u>Antp</u>          | +12307                 | 7             | 9                         | 7                             | 9       | 4.5                                       |                        |
| 312 | PCE8399                | X         | 20,268,266 | 20,269,376 | 1,111    | <u>CG15453</u>       | -1554                  | <u>CG1379</u>        | +8904                  | 6             | 11                        | 5                             | 10      | 4.5                                       |                        |
| 313 | PCE8401                | 2L        | 12,660,502 | 12,661,614 | 1,113    | <u>CG15485</u>       | -2463                  | <u>pdm2</u>          | +5861                  | 6             | 11                        | 5                             | 10      | 4.5                                       |                        |
| 314 | PCE8402                | 3L        | 18,077,103 | 18,078,164 | 1,062    | <u>CG7341</u>        | +15260                 | <u>Cyp312a1</u>      | +2781                  | 7             | 9                         | 7                             | 8       | 4.5                                       |                        |
| 315 | PCE8403                | 3R        | 25,087,655 | 25,088,209 | 555      | <u>stg</u>           | -16787                 | <u>CG14506</u>       | +24108                 | 5             | 6                         | 9                             | 11      | 4.5                                       |                        |

| CRM | Overlaps known element | Chrom arm | pCRM start | pCRM end   | pCRM len | 5' gene      | pCRM relative position | 3' gene      | pCRM relative position | Aligned sites | Aligned + preserved sites | Aligned site dens | Aligned + preserved site dens | z-score | Additional Gap/pair-rule gene within 20kb | pCRM relative position |
|-----|------------------------|-----------|------------|------------|----------|--------------|------------------------|--------------|------------------------|---------------|---------------------------|-------------------|-------------------------------|---------|-------------------------------------------|------------------------|
| 316 | PCE8404                | X         | 19,558,673 | 19,559,489 | 817      | CG11942      | -3714                  | CG11940      | +19924                 | 6             | 8                         | 7                 | 10                            | 4.5     |                                           |                        |
| 317 | PCE8405                | 3L        | 1,109,402  | 1,109,990  | 589      | CG32336      | -9787                  | bab2         | +47913                 | 4             | 8                         | 7                 | 14                            | 4.4     |                                           |                        |
| 318 | PCE8406                | 3R        | 23,650,127 | 23,651,382 | 1,256    | CG5566       | -921                   | Or98a        | -9654                  | 6             | 12                        | 5                 | 10                            | 4.4     |                                           |                        |
| 319 | PCE8407                | 2L        | 11,341,949 | 11,342,574 | 626      | CG14926      | -9815                  | salr         | -11601                 | 5             | 7                         | 8                 | 11                            | 4.4     |                                           |                        |
| 320 | PCE8408                | X         | 8,379,690  | 8,381,014  | 1,325    | oc           | +8582                  | oc           | +8582                  | 5             | 14                        | 4                 | 11                            | 4.4     |                                           |                        |
| 321 | PCE8409                | 2L        | 21,908,048 | 21,908,515 | 468      | CG31702      | +3820                  | CG6691       | -4232                  | 4             | 6                         | 9                 | 13                            | 4.4     |                                           |                        |
| 322 | PCE8410                | 2L        | 1,581,371  | 1,582,072  | 702      | CG14351      | +24547                 | CG10869      | +6864                  | 5             | 8                         | 7                 | 11                            | 4.4     |                                           |                        |
| 323 | PCE8411                | 3R        | 17,913,658 | 17,914,400 | 743      | CG5791       | +9840                  | CG13407      | -5699                  | 6             | 7                         | 8                 | 9                             | 4.4     |                                           |                        |
| 324 | PCE8412                | X         | 11,994,565 | 11,996,148 | 1,584    | Ten-a        | +33878                 | Ten-a        | +33878                 | 8             | 11                        | 5                 | 7                             | 4.4     |                                           |                        |
| 325 | PCE8413                | X         | 14,942,402 | 14,943,324 | 923      | CG5662       | +991                   | CG15030      | -3478                  | 6             | 9                         | 7                 | 10                            | 4.4     |                                           |                        |
| 326 | PCE8415                | 3R        | 13,867,601 | 13,868,164 | 564      | CG7794       | +18158                 | htl          | +6934                  | 5             | 6                         | 9                 | 11                            | 4.4     |                                           |                        |
| 327 | PCE8416                | X         | 7,122,644  | 7,123,928  | 1,285    | CG15033      | +4005                  | CG1677       | +22209                 | 8             | 9                         | 6                 | 7                             | 4.4     |                                           |                        |
| 328 | PCE8417                | 2L        | 587,804    | 588,638    | 835      | Gsc          | +7714                  | Gsc          | +7714                  | 6             | 8                         | 7                 | 10                            | 4.4     |                                           |                        |
| 329 | PCE8418                | 3R        | 18,950,000 | 18,950,634 | 635      | CG31457      | -5638                  | hh           | +7739                  | 5             | 7                         | 8                 | 11                            | 4.4     | cenB1A                                    | 12397                  |
| 330 | PCE8419                | 2R        | 5,453,237  | 5,454,330  | 1,094    | CG12899      | -4190                  | CG12898      | +13748                 | 7             | 9                         | 6                 | 8                             | 4.4     |                                           |                        |
| 331 | PCE8420                | 2L        | 8,641,383  | 8,642,092  | 710      | Sema-1a      | +85357                 | Sema-1a      | +85357                 | 5             | 8                         | 7                 | 11                            | 4.4     |                                           |                        |
| 332 | PCE8421                | 3L        | 13,240,137 | 13,240,704 | 568      | caps         | +53902                 | Acp70A       | -18498                 | 5             | 6                         | 9                 | 11                            | 4.4     |                                           |                        |
| 333 | PCE8422                | 3R        | 17,657,890 | 17,658,819 | 930      | CG13416      | +300                   | Gr93b        | +1650                  | 4             | 12                        | 4                 | 13                            | 4.4     |                                           |                        |
| 334 | PCE8423                | 3L        | 15,970,589 | 15,971,950 | 1,362    | CG5841       | -9898                  | Notum        | -6316                  | 7             | 11                        | 5                 | 8                             | 4.4     |                                           |                        |
| 335 | PCE8424                | 3R        | 8,070,353  | 8,071,965  | 1,613    | Cyp313a3     | -5503                  | CG3942       | -7962                  | 8             | 11                        | 5                 | 7                             | 4.4     |                                           |                        |
| 336 | PCE8425                | 2R        | 18,693,096 | 18,694,318 | 1,223    | retn         | +16917                 | CG5411       | -6825                  | 7             | 10                        | 6                 | 8                             | 4.4     |                                           |                        |
| 337 | PCE8426                | 2L        | 1,268,149  | 1,268,904  | 756      | robo3        | +9658                  | robo3        | +9658                  | 6             | 7                         | 8                 | 9                             | 4.4     |                                           |                        |
| 338 | PCE8427                | 3R        | 9,625,048  | 9,625,469  | 422      | CG14363      | -8328                  | Mst87F       | +27982                 | 4             | 5                         | 9                 | 12                            | 4.4     |                                           |                        |
| 339 | PCE8428                | CE8013    | 13,989,283 | 13,990,133 | 851      | rk           | -5879                  | bgm          | -5766                  | 6             | 8                         | 7                 | 9                             | 4.3     |                                           |                        |
| 340 | PCE8429                | X         | 9,756,644  | 9,758,386  | 1,743    | CG2990       | +6234                  | CG2989       | -11633                 | 7             | 13                        | 4                 | 7                             | 4.3     |                                           |                        |
| 341 | PCE8430                | 3L        | 10,258,913 | 10,259,595 | 683      | CG6559       | +10647                 | CG6559       | +10647                 | 4             | 9                         | 6                 | 13                            | 4.3     |                                           |                        |
| 342 | PCE8431                | 2L        | 16,508,455 | 16,510,102 | 1,648    | CG5953       | +859                   | CG5953       | +859                   | 6             | 14                        | 4                 | 8                             | 4.3     |                                           |                        |
| 343 | PCE8432                | 2L        | 21,728,314 | 21,729,432 | 1,119    | tsh          | +66599                 | CG11629      | +1950                  | 5             | 12                        | 4                 | 11                            | 4.3     |                                           |                        |
| 344 | PCE8433                | 2L        | 15,966,384 | 15,967,151 | 768      | BG:DS07486.2 | +8741                  | beat-1c      | -11469                 | 6             | 7                         | 8                 | 9                             | 4.3     |                                           |                        |
| 345 | PCE8434                | 3R        | 23,863,568 | 23,864,216 | 649      | CG12870      | +907                   | CG12870      | +907                   | 5             | 7                         | 8                 | 11                            | 4.3     |                                           |                        |
| 346 | PCE8435                | 2L        | 5,445,679  | 5,446,492  | 814      | CG31647      | -4262                  | CG6634       | -7363                  | 5             | 9                         | 6                 | 11                            | 4.3     |                                           |                        |
| 347 | PCE8436                | 3L        | 9,967,152  | 9,967,845  | 694      | CG14162      | +35005                 | CG14162      | +35005                 | 6             | 6                         | 9                 | 9                             | 4.3     |                                           |                        |
| 348 | PCE8437                | 2L        | 893,144    | 893,838    | 695      | CG15824      | -6427                  | CG11297      | -3055                  | 6             | 6                         | 9                 | 9                             | 4.3     |                                           |                        |
| 349 | PCE8438                | 2L        | 11,536,884 | 11,537,539 | 656      | CG31706      | -16964                 | Mst33A       | +37946                 | 5             | 7                         | 8                 | 11                            | 4.3     |                                           |                        |
| 350 | PCE8439                | X         | 4,770,587  | 4,771,859  | 1,273    | CG12680      | +32240                 | ovo          | -17051                 | 7             | 10                        | 5                 | 8                             | 4.3     |                                           |                        |
| 351 | PCE8440                | 3L        | 11,295,694 | 11,296,961 | 1,268    | CG6168       | -16443                 | CG6163       | +25456                 | 5             | 13                        | 4                 | 10                            | 4.3     |                                           |                        |
| 352 | PCE8441                | 2R        | 8,434,804  | 8,435,354  | 551      | CG17048      | -15757                 | CG10814      | +7074                  | 4             | 7                         | 7                 | 13                            | 4.3     |                                           |                        |
| 353 | PCE8442                | X         | 8,521,716  | 8,522,921  | 1,206    | Lim1         | +21853                 | Lim1         | +21853                 | 6             | 11                        | 5                 | 9                             | 4.3     |                                           |                        |
| 354 | PCE8443                | 2L        | 20,456,074 | 20,457,355 | 1,282    | CG2493       | -22883                 | CG15476      | +14537                 | 7             | 10                        | 5                 | 8                             | 4.3     |                                           |                        |
| 355 | PCE8444                | 3L        | 18,330,763 | 18,332,045 | 1,283    | grim         | -77470                 | rpr          | +15237                 | 7             | 10                        | 5                 | 8                             | 4.3     |                                           |                        |
| 356 | PCE8445                | 3R        | 9,353,080  | 9,354,054  | 975      | CG12538      | -3804                  | CG31337      | +17071                 | 6             | 9                         | 6                 | 9                             | 4.3     |                                           |                        |
| 357 | PCE8446                | 3R        | 22,428,048 | 22,429,201 | 1,154    | CG5467       | +15290                 | CG5468       | -5008                  | 7             | 9                         | 6                 | 8                             | 4.3     |                                           |                        |
| 358 | PCE8447                | 3R        | 17,401,939 | 17,403,156 | 1,218    | InR          | -4724                  | E2f          | +46552                 | 6             | 11                        | 5                 | 9                             | 4.3     |                                           |                        |
| 359 | PCE8448                | X         | 7,394,857  | 7,395,556  | 700      | ct           | +22255                 | ct           | +22255                 | 4             | 9                         | 6                 | 13                            | 4.3     |                                           |                        |
| 360 | PCE8449                | 3R        | 9,269,352  | 9,270,575  | 1,224    | CG9764       | -8629                  | CG14372      | -11080                 | 8             | 8                         | 7                 | 7                             | 4.3     |                                           |                        |
| 361 | PCE8450                | 3L        | 5,141,131  | 5,141,793  | 663      | CG32423      | +2971                  | CG10677      | -438                   | 5             | 7                         | 8                 | 11                            | 4.3     |                                           |                        |
| 362 | PCE8451                | 2L        | 15,947,581 | 15,948,244 | 664      | CG31736      | +1080                  | BG:DS07486.2 | -9399                  | 5             | 7                         | 8                 | 11                            | 4.2     |                                           |                        |
| 363 | PCE8452                | 2L        | 16,567,799 | 16,568,462 | 664      | CG13260      | +31587                 | CG31815      | -11534                 | 5             | 7                         | 8                 | 11                            | 4.2     |                                           |                        |
| 364 | PCE8453                | 3R        | 24,035,108 | 24,036,202 | 1,095    | CG12425      | +73197                 | CG4787       | -13984                 | 6             | 10                        | 5                 | 9                             | 4.2     |                                           |                        |
| 365 | PCE8454                | 2L        | 2,999,166  | 2,999,722  | 557      | BEST:LD23852 | +13634                 | CG17265      | -6347                  | 4             | 7                         | 7                 | 13                            | 4.2     |                                           |                        |
| 366 | PCE8455                | 3R        | 2,388,846  | 2,389,510  | 665      | CG1137       | -2772                  | CG33202      | +29543                 | 5             | 7                         | 8                 | 11                            | 4.2     |                                           |                        |
| 367 | PCE8456                | 2L        | 9,059,953  | 9,060,882  | 930      | CG31708      | +2511                  | CG31708      | +2511                  | 5             | 10                        | 5                 | 11                            | 4.2     |                                           |                        |
| 368 | PCE8458                | 3L        | 19,101,833 | 19,102,666 | 834      | fz2          | +6194                  | fz2          | +6194                  | 5             | 9                         | 6                 | 11                            | 4.2     |                                           |                        |
| 369 | PCE8459                | 3R        | 9,444,257  | 9,444,783  | 527      | CG9269       | +2513                  | CG14368      | +6587                  | 5             | 5                         | 9                 | 9                             | 4.2     |                                           |                        |
| 370 | PCE8460                | 2L        | 9,962,785  | 9,964,166  | 1,382    | RpL13        | +3065                  | bib          | -12889                 | 8             | 9                         | 6                 | 7                             | 4.2     |                                           |                        |
| 371 | PCE8461                | X         | 13,691,125 | 13,692,755 | 1,631    | CG11068      | +5216                  | CG32613      | +5235                  | 5             | 15                        | 3                 | 9                             | 4.2     |                                           |                        |
| 372 | PCE8462                | 2L        | 11,578,719 | 11,579,821 | 1,103    | Mst33A       | -3015                  | CG32952      | +730                   | 6             | 10                        | 5                 | 9                             | 4.2     |                                           |                        |
| 373 | PCE8463                | 3L        | 7,777,464  | 7,778,568  | 1,105    | Pdp1         | +7547                  | Pdp1         | +7547                  | 6             | 10                        | 5                 | 9                             | 4.2     |                                           |                        |
| 374 | PCE8464                | 3L        | 17,314,105 | 17,314,815 | 711      | tap          | +5577                  | Cad74A       | +13577                 | 6             | 6                         | 8                 | 8                             | 4.2     |                                           |                        |
| 375 | PCE8465                | 2R        | 17,318,862 | 17,320,846 | 1,985    | dve          | +31349                 | dve          | +31349                 | 8             | 12                        | 4                 | 6                             | 4.2     |                                           |                        |
| 376 | PCE8466                | 3L        | 4,137,270  | 4,137,983  | 714      | CG15000      | -148                   | CG15001      | +3292                  | 6             | 6                         | 8                 | 8                             | 4.2     |                                           |                        |
| 377 | PCE8467                | X         | 19,624,303 | 19,625,098 | 796      | CG32529      | +1156                  | CG32529      | +1156                  | 4             | 10                        | 5                 | 13                            | 4.2     |                                           |                        |
| 378 | PCE8468                | 3R        | 24,305,523 | 24,305,962 | 440      | Dhc98D       | +3483                  | Dhc98D       | +3483                  | 4             | 5                         | 9                 | 11                            | 4.2     |                                           |                        |

| CRM | Overlaps known element | Chrom arm | pCRM start | pCRM end   | pCRM len | 5' gene      | pCRM relative position | 3' gene       | pCRM relative position | Aligned sites | Aligned + preserved sites | Aligned site dens | Aligned + preserved site dens | z-score | Additional Gap/pair-rule gene within 20kb | pCRM relative position |
|-----|------------------------|-----------|------------|------------|----------|--------------|------------------------|---------------|------------------------|---------------|---------------------------|-------------------|-------------------------------|---------|-------------------------------------------|------------------------|
| 379 | PCE8469                | 3R        | 9,771,895  | 9,772,496  | 602      | CG9927       | -372                   | BcDNA:LD34214 | -1679                  | 5             | 6                         | 8                 | 10                            | 4.2     |                                           |                        |
| 380 | PCE8470                | 2L        | 18,400,276 | 18,401,850 | 1,575    | Fas3         | +102093                | Rp526         | +19362                 | 6             | 13                        | 4                 | 8                             | 4.2     |                                           |                        |
| 381 | PCE8471                | 3R        | 9,696,260  | 9,697,381  | 1,122    | E5           | +2539                  | E5            | +2539                  | 6             | 10                        | 5                 | 9                             | 4.2     |                                           |                        |
| 382 | PCE8472                | 2L        | 12,563,964 | 12,564,680 | 717      | bun          | -34523                 | CG15489       | -17977                 | 4             | 9                         | 6                 | 13                            | 4.2     |                                           |                        |
| 383 | PCE8473                | 3R        | 26,758,899 | 26,759,618 | 720      | CG15550      | -6713                  | CG15548       | -15276                 | 6             | 6                         | 8                 | 8                             | 4.2     |                                           |                        |
| 384 | PCE8474                | 2R        | 16,929,770 | 16,930,373 | 604      | PpN58A       | -3336                  | CG4054        | -42697                 | 5             | 6                         | 8                 | 10                            | 4.2     |                                           |                        |
| 385 | PCE8475                | 3L        | 13,564,776 | 13,566,272 | 1,497    | bru-3        | +58045                 | bru-3         | +58045                 | 7             | 11                        | 5                 | 7                             | 4.2     |                                           |                        |
| 386 | PCE8476                | 2L        | 2,611,713  | 2,612,394  | 682      | CG15395      | +9001                  | CG9962        | +27818                 | 5             | 7                         | 7                 | 10                            | 4.2     |                                           |                        |
| 387 | PCE8477                | 2L        | 12,886,108 | 12,886,791 | 684      | kek1         | -74451                 | ACXC          | -14608                 | 5             | 7                         | 7                 | 10                            | 4.2     |                                           |                        |
| 388 | PCE8478                | 3R        | 14,587,862 | 14,588,629 | 768      | CG14299      | -3257                  | CG31227       | +9876                  | 5             | 8                         | 7                 | 10                            | 4.1     |                                           |                        |
| 389 | PCE8479                | 3L        | 12,644,990 | 12,646,008 | 1,019    | CG32111      | +59508                 | mirr          | -5286                  | 6             | 9                         | 6                 | 9                             | 4.1     |                                           |                        |
| 390 | PCE8480                | X         | 13,596,848 | 13,598,453 | 1,606    | CG11071      | -9065                  | CG32611       | +17718                 | 6             | 13                        | 4                 | 8                             | 4.1     |                                           |                        |
| 391 | PCE8481                | 3L        | 18,208,922 | 18,209,999 | 1,078    | CG7313       | +7947                  | CG5103        | +33247                 | 5             | 11                        | 5                 | 10                            | 4.1     |                                           |                        |
| 392 | PCE8483                | 2L        | 8,265,854  | 8,267,283  | 1,430    | Btk29A       | +2646                  | Btk29A        | +2646                  | 4             | 15                        | 3                 | 10                            | 4.1     |                                           |                        |
| 393 | PCE8484                | 3L        | 7,158,937  | 7,160,467  | 1,531    | CG32387      | -15506                 | CG14826       | -33845                 | 7             | 11                        | 5                 | 7                             | 4.1     |                                           |                        |
| 394 | PCE8485                | 3L        | 5,784,325  | 5,785,412  | 1,088    | vn           | +19510                 | vn            | +19510                 | 7             | 8                         | 6                 | 7                             | 4.1     |                                           |                        |
| 395 | PCE8486                | 3L        | 5,444,803  | 5,446,015  | 1,213    | CG4835       | +5360                  | CG10630       | +12223                 | 5             | 12                        | 4                 | 10                            | 4.1     |                                           |                        |
| 396 | PCE8487                | 3R        | 24,227,355 | 24,228,443 | 1,089    | Or98b        | +60026                 | beat-VI       | -4848                  | 7             | 8                         | 6                 | 7                             | 4.1     |                                           |                        |
| 397 | PCE8488                | X         | 211,076    | 211,586    | 511      | pcl          | -16196                 | ase           | -6351                  | 4             | 6                         | 8                 | 12                            | 4.1     |                                           |                        |
| 398 | PCE8489                | 2L        | 17,702,171 | 17,703,204 | 1,034    | CadN         | +14400                 | CadN          | +14400                 | 6             | 9                         | 6                 | 9                             | 4.1     |                                           |                        |
| 399 | PCE8490                | 3R        | 17,791,038 | 17,791,617 | 580      | CG31171      | -41532                 | Eip93F        | -694                   | 4             | 7                         | 7                 | 12                            | 4.1     |                                           |                        |
| 400 | PCE8491                | 3L        | 2,162,230  | 2,163,458  | 1,229    | CG15820      | -7269                  | CG13810       | -3167                  | 7             | 9                         | 6                 | 7                             | 4.1     |                                           |                        |
| 401 | PCE8492                | 2L        | 17,689,744 | 17,690,224 | 481      | CadN         | +27380                 | CadN          | +27380                 | 3             | 7                         | 6                 | 15                            | 4.1     |                                           |                        |
| 402 | PCE8493                | 3R        | 6,403,852  | 6,405,604  | 1,753    | hth          | +25806                 | hth           | +25806                 | 7             | 12                        | 4                 | 7                             | 4.1     |                                           |                        |
| 403 | PCE8494                | 3R        | 7,931,641  | 7,932,680  | 1,040    | CG31361      | +7815                  | CG31361       | +7815                  | 6             | 9                         | 6                 | 9                             | 4.1     |                                           |                        |
| 404 | PCE8495                | 2L        | 5,214,677  | 5,215,845  | 1,169    | CG6514       | +3847                  | tkv           | +14084                 | 6             | 10                        | 5                 | 9                             | 4.1     |                                           |                        |
| 405 | PCE8497                | 3L        | 3,386,043  | 3,387,280  | 1,238    | sty          | +11276                 | sty           | +11276                 | 5             | 12                        | 4                 | 10                            | 4.1     |                                           |                        |
| 406 | PCE8498                | 3R        | 13,968,428 | 13,969,741 | 1,314    | sr           | +20494                 | CG14316       | -8115                  | 6             | 11                        | 5                 | 8                             | 4.1     |                                           |                        |
| 407 | PCE8499                | 2R        | 10,661,967 | 10,662,848 | 882      | CG8204       | -24251                 | CG30465       | -7143                  | 5             | 9                         | 6                 | 10                            | 4.1     |                                           |                        |
| 408 | PCE8500                | X         | 6,969,321  | 6,970,022  | 702      | CG9650       | +5106                  | CG9650        | +5106                  | 5             | 7                         | 7                 | 10                            | 4.1     |                                           |                        |
| 409 | PCE8501                | 2L        | 5,247,719  | 5,248,767  | 1,049    | tkv          | +10898                 | Cyp4ac1       | -7804                  | 6             | 9                         | 6                 | 9                             | 4.1     |                                           |                        |
| 410 | PCE8502                | 3L        | 5,346,875  | 5,347,536  | 662      | CG10633      | -4746                  | CG4814        | -44778                 | 4             | 8                         | 6                 | 12                            | 4.1     |                                           |                        |
| 411 | PCE8503                | X         | 7,105,113  | 7,106,001  | 889      | CG1999       | +5941                  | CG1677        | +40136                 | 5             | 9                         | 6                 | 10                            | 4.1     |                                           |                        |
| 412 | PCE8504                | 2R        | 14,950,058 | 14,951,645 | 1,588    | CG13872      | -5425                  | CG30447       | -59383                 | 7             | 11                        | 4                 | 7                             | 4.1     |                                           |                        |
| 413 | PCE8505                | 3L        | 9,077,635  | 9,078,190  | 556      | bol          | +5815                  | bol           | +5815                  | 5             | 5                         | 9                 | 9                             | 4.1     |                                           |                        |
| 414 | PCE8507                | X         | 7,100,782  | 7,101,787  | 1,006    | CG1999       | +1610                  | CG1677        | +44350                 | 7             | 7                         | 7                 | 7                             | 4.0     |                                           |                        |
| 415 | PCE8509                | 2L        | 2,494,167  | 2,495,118  | 952      | oaf          | +8646                  | CG3528        | +15486                 | 6             | 8                         | 6                 | 8                             | 4.0     |                                           |                        |
| 416 | PCE8510                | 2L        | 14,866,153 | 14,866,865 | 713      | Mst35Bb      | -4354                  | CG15277       | +20986                 | 5             | 7                         | 7                 | 10                            | 4.0     |                                           |                        |
| 417 | PCE8511                | 3R        | 6,469,170  | 6,470,599  | 1,430    | hth          | -4766                  | CG6465        | +32311                 | 7             | 10                        | 5                 | 7                             | 4.0     |                                           |                        |
| 418 | PCE8512                | 2L        | 12,663,453 | 12,664,721 | 1,269    | pdm2         | +2754                  | pdm2          | +2754                  | 5             | 12                        | 4                 | 9                             | 4.0     |                                           |                        |
| 419 | PCE8513                | 3L        | 14,550,945 | 14,551,746 | 802      | HGTX         | -2497                  | Cyp314a1      | -16963                 | 5             | 8                         | 6                 | 10                            | 4.0     |                                           |                        |
| 420 | PCE8514                | 2L        | 20,469,960 | 20,470,764 | 805      | CG2493       | -36769                 | CG15476       | +1128                  | 5             | 8                         | 6                 | 10                            | 4.0     |                                           |                        |
| 421 | PCE8515                | 2L        | 16,390,610 | 16,392,235 | 1,626    | BG:DS02780.1 | +34314                 | BG:DS02780.1  | +34314                 | 7             | 11                        | 4                 | 7                             | 4.0     |                                           |                        |
| 422 | PCE8516                | 2R        | 17,095,726 | 17,096,802 | 1,077    | PpD5         | -9293                  | CG13500       | +4430                  | 6             | 9                         | 6                 | 8                             | 4.0     |                                           |                        |
| 423 | PCE8517                | 3L        | 11,326,031 | 11,327,309 | 1,279    | CG6163       | -3614                  | CG11726       | -24993                 | 5             | 12                        | 4                 | 9                             | 4.0     |                                           |                        |
| 424 | PCE8518                | 3L        | 7,224,680  | 7,225,208  | 529      | CG14830      | -1234                  | unc-13-4A     | +19308                 | 4             | 6                         | 8                 | 11                            | 4.0     |                                           |                        |
| 425 | PCE8519                | 3L        | 8,975,309  | 8,975,873  | 565      | Doc2         | +2077                  | Doc2          | +2077                  | 5             | 5                         | 9                 | 9                             | 4.0     | Doc3                                      | 11402                  |
| 426 | PCE8520                | 2L        | 12,080,772 | 12,081,448 | 677      | prd          | -5445                  | CG5325        | -1193                  | 4             | 8                         | 6                 | 12                            | 4.0     |                                           |                        |
| 427 | PCE8521                | 2L        | 7,252,370  | 7,253,008  | 639      | CG31909      | +2569                  | Wnt4          | +16391                 | 5             | 6                         | 8                 | 9                             | 4.0     | Ndae1                                     | -19639                 |
| 428 | PCE8522                | 3R        | 15,325,630 | 15,326,485 | 856      | Dys          | +3044                  | Dys           | +3044                  | 4             | 10                        | 5                 | 12                            | 4.0     |                                           |                        |
| 429 | PCE8523                | 3R        | 13,942,711 | 13,943,621 | 911      | sr           | +4313                  | sr            | +4313                  | 5             | 9                         | 5                 | 10                            | 4.0     |                                           |                        |
| 430 | PCE8524                | 3L        | 7,144,287  | 7,145,055  | 769      | CG32387      | -856                   | CG14826       | -49257                 | 6             | 6                         | 8                 | 8                             | 4.0     |                                           |                        |
| 431 | PCE8525                | 2L        | 16,786,999 | 16,787,766 | 768      | Ugt36Bc      | +9887                  | CG13272       | -1982                  | 4             | 9                         | 5                 | 12                            | 4.0     |                                           |                        |
| 432 | PCE8527                | 2L        | 3,949,933  | 3,951,233  | 1,301    | fred         | -10204                 | CG15422       | -46391                 | 5             | 12                        | 4                 | 9                             | 4.0     |                                           |                        |
| 433 | PCE8528                | X         | 14,366,706 | 14,367,311 | 606      | NetA         | +17535                 | NetA          | +17535                 | 4             | 7                         | 7                 | 12                            | 4.0     |                                           |                        |
| 434 | PCE8529                | 2R        | 13,008,426 | 13,009,734 | 1,309    | elk          | +70755                 | PpY-55A       | +10561                 | 7             | 9                         | 5                 | 7                             | 4.0     |                                           |                        |
| 435 | PCE8530                | X         | 12,580,305 | 12,581,227 | 923      | CG3754       | -18007                 | CG4661        | +7157                  | 5             | 9                         | 5                 | 10                            | 4.0     |                                           |                        |
| 436 | PCE8531                | 3R        | 6,363,866  | 6,364,968  | 1,103    | CG31394      | -8970                  | hth           | +66442                 | 6             | 9                         | 5                 | 8                             | 4.0     |                                           |                        |
| 437 | PCE8532                | 2L        | 1,404,981  | 1,405,630  | 650      | lea          | +16485                 | lea           | +16485                 | 5             | 6                         | 8                 | 9                             | 3.9     |                                           |                        |
| 438 | PCE8533                | 3R        | 24,402,963 | 24,403,946 | 984      | fkh          | -2792                  | Noa36         | +10421                 | 6             | 8                         | 6                 | 8                             | 3.9     |                                           |                        |
| 439 | PCE8534                | 3R        | 18,095,882 | 18,096,534 | 653      | CG31163      | +1249                  | CG31163       | +1249                  | 5             | 6                         | 8                 | 9                             | 3.9     |                                           |                        |
| 440 | PCE8535                | 3R        | 2,859,299  | 2,860,288  | 990      | Antp         | -33021                 | Sodh-1        | -17769                 | 6             | 8                         | 6                 | 8                             | 3.9     |                                           |                        |
| 441 | PCE8536                | 3R        | 12,764,472 | 12,765,970 | 1,499    | Abd-B        | +4036                  | Abd-B         | +4036                  | 7             | 10                        | 5                 | 7                             | 3.9     |                                           |                        |

| CRM | Overlaps known element | Chrom arm | pCRM start | pCRM end   | pCRM len | 5' gene        | pCRM relative position | 3' gene        | pCRM relative position | Aligned sites | Aligned + preserved sites | Aligned site dens | Aligned + preserved site dens | z-score | Additional Gap/pair-rule gene within 20kb | pCRM relative position |
|-----|------------------------|-----------|------------|------------|----------|----------------|------------------------|----------------|------------------------|---------------|---------------------------|-------------------|-------------------------------|---------|-------------------------------------------|------------------------|
| 442 | PCE8537                | X         | 10,304,767 | 10,305,879 | 1,113    | spri           | -17771                 | CG15296        | +880                   | 6             | 9                         | 5                 | 8                             | 3.9     |                                           |                        |
| 443 | PCE8538                | 3L        | 14,319,615 | 14,320,496 | 882      | CG13481        | -1092                  | CG3868         | +31103                 | 6             | 7                         | 7                 | 8                             | 3.9     |                                           |                        |
| 444 | PCE8539                | 2R        | 10,093,650 | 10,094,587 | 938      | Obp51a         | -5085                  | hbs            | +19464                 | 7             | 6                         | 7                 | 6                             | 3.9     |                                           |                        |
| 445 | PCE8540                | 2L        | 16,605,006 | 16,605,888 | 883      | CG31738        | +4879                  | CG31738        | +4879                  | 6             | 7                         | 7                 | 8                             | 3.9     |                                           |                        |
| 446 | PCE8541                | 2L        | 2,682,494  | 2,683,612  | 1,119    | CG31690        | +15103                 | CG15398        | +5275                  | 6             | 9                         | 5                 | 8                             | 3.9     |                                           |                        |
| 447 | PCE8542                | 3L        | 17,960,347 | 17,960,963 | 617      | Eip75B         | +11647                 | Eip75B         | +11647                 | 4             | 7                         | 6                 | 11                            | 3.9     |                                           |                        |
| 448 | PCE8543                | X         | 7,088,709  | 7,089,648  | 940      | CG15034        | -838                   | CG1999         | -9524                  | 5             | 9                         | 5                 | 10                            | 3.9     |                                           |                        |
| 449 | PCE8544                | 2R        | 10,089,704 | 10,091,422 | 1,719    | Obp51a         | -1139                  | hbs            | +16299                 | 7             | 11                        | 4                 | 6                             | 3.9     |                                           |                        |
| 450 | PCE8545                | 2L        | 19,581,175 | 19,581,755 | 581      | CG10366        | +18834                 | Lar            | -7737                  | 3             | 8                         | 5                 | 14                            | 3.9     |                                           |                        |
| 451 | PCE8546                | 3L        | 4,674,003  | 4,674,586  | 584      | CG15876        | -1323                  | CG13713        | -1033                  | 5             | 5                         | 9                 | 9                             | 3.9     |                                           |                        |
| 452 | PCE8547                | X         | 3,111,977  | 3,112,560  | 584      | dnc            | +19670                 | dm             | -19060                 | 5             | 5                         | 9                 | 9                             | 3.9     |                                           |                        |
| 453 | PCE8548                | 3R        | 4,509,837  | 4,510,965  | 1,129    | CG11755        | +5816                  | hb             | +9372                  | 6             | 9                         | 5                 | 8                             | 3.9     |                                           |                        |
| 454 | PCE8549                | 3R        | 26,836,195 | 26,837,262 | 1,068    | 5-HT7          | -4260                  | CanA1          | -17201                 | 7             | 7                         | 7                 | 7                             | 3.9     |                                           |                        |
| 455 | PCE8550                | 3L        | 12,339,988 | 12,340,734 | 747      | CG4357         | +8228                  | CG4357         | +8228                  | 5             | 7                         | 7                 | 9                             | 3.9     |                                           |                        |
| 456 | PCE8552                | 2L        | 19,612,876 | 19,613,719 | 844      | Lar            | +23384                 | Lar            | +23384                 | 5             | 8                         | 6                 | 9                             | 3.9     |                                           |                        |
| 457 | PCE8553                | 2R        | 16,289,218 | 16,289,840 | 623      | CG18375        | +4664                  | CG18375        | +4664                  | 4             | 7                         | 6                 | 11                            | 3.9     |                                           |                        |
| 458 | PCE8554                | 3R        | 4,051,838  | 4,052,844  | 1,007    | CG18249        | +5933                  | DNApol-iota    | -6399                  | 4             | 11                        | 4                 | 11                            | 3.9     |                                           |                        |
| 459 | PCE8555                | 3L        | 3,972,362  | 3,972,911  | 550      | scrt           | +7818                  | CG14985        | -11189                 | 4             | 6                         | 7                 | 11                            | 3.9     |                                           |                        |
| 460 | PCE8556                | 3R        | 18,054,746 | 18,055,816 | 1,071    | CG31163        | +38817                 | CG31163        | +38817                 | 5             | 10                        | 5                 | 9                             | 3.9     |                                           |                        |
| 461 | PCE8557                | 3L        | 10,286,478 | 10,288,336 | 1,859    | CG6559         | -16236                 | CG12362        | -82008                 | 6             | 13                        | 3                 | 7                             | 3.9     |                                           |                        |
| 462 | PCE8558                | 3R        | 26,927,721 | 26,928,386 | 666      | CG11318        | -3445                  | Prosalpha3T    | +10083                 | 5             | 6                         | 8                 | 9                             | 3.9     |                                           |                        |
| 463 | PCE8559                | 3R        | 26,492,980 | 26,494,633 | 1,654    | CG15541        | +28726                 | CG1342         | -11098                 | 8             | 9                         | 5                 | 5                             | 3.9     |                                           |                        |
| 464 | PCE8560                | 2R        | 9,444,567  | 9,445,584  | 1,018    | CG8422         | +2717                  | CG8422         | +2717                  | 6             | 8                         | 6                 | 8                             | 3.9     |                                           |                        |
| 465 | PCE8561                | CE8023    | 2,594,997  | 2,596,453  | 1,457    | Ama            | +5869                  | Dfd            | -21105                 | 6             | 11                        | 4                 | 8                             | 3.9     | bcd                                       | -9797                  |
| 466 | PCE8563                | 2R        | 9,986,845  | 9,988,405  | 1,561    | BcDNA:GH03482  | -10902                 | CG10253        | +8621                  | 7             | 10                        | 4                 | 6                             | 3.9     |                                           |                        |
| 467 | PCE8564                | X         | 9,441,828  | 9,443,049  | 1,222    | btd            | +8657                  | Sp1            | -48893                 | 5             | 11                        | 4                 | 9                             | 3.8     |                                           |                        |
| 468 | PCE8565                | 2L        | 17,262,387 | 17,263,351 | 965      | beat-IIIc      | -23572                 | CG6380         | +6939                  | 5             | 9                         | 5                 | 9                             | 3.8     |                                           |                        |
| 469 | PCE8566                | 3L        | 9,279,858  | 9,280,823  | 966      | Glu-RIB        | +68725                 | PGRP-LA        | -12219                 | 5             | 9                         | 5                 | 9                             | 3.8     |                                           |                        |
| 470 | PCE8567                | 3L        | 22,362,130 | 22,362,803 | 674      | CG14460        | +20934                 | CG11449        | -8847                  | 5             | 6                         | 7                 | 9                             | 3.8     |                                           |                        |
| 471 | PCE8568                | 2L        | 9,811,200  | 9,812,771  | 1,572    | nAcRalpha-30D  | +65672                 | nAcRalpha-30D  | +65672                 | 7             | 10                        | 4                 | 6                             | 3.8     |                                           |                        |
| 472 | PCE8569                | 2L        | 18,312,711 | 18,313,740 | 1,030    | Fas3           | +14528                 | Fas3           | +14528                 | 6             | 8                         | 6                 | 8                             | 3.8     |                                           |                        |
| 473 | PCE8570                | 2L        | 8,797,367  | 8,797,855  | 489      | CG9468         | -23885                 | SoxN           | -20000                 | 4             | 5                         | 8                 | 10                            | 3.8     |                                           |                        |
| 474 | PCE8572                | 2R        | 12,378,676 | 12,379,906 | 1,231    | CG33197        | +49399                 | CG33197        | +49399                 | 5             | 11                        | 4                 | 9                             | 3.8     |                                           |                        |
| 475 | PCE8573                | 3R        | 6,374,489  | 6,376,060  | 1,572    | hth            | +55350                 | hth            | +55350                 | 5             | 13                        | 3                 | 8                             | 3.8     |                                           |                        |
| 476 | PCE8574                | X         | 2,666,269  | 2,667,300  | 1,032    | EG:BACR43E12.4 | +16263                 | EG:100G7.6     | -9240                  | 6             | 8                         | 6                 | 8                             | 3.8     |                                           |                        |
| 477 | PCE8575                | 2R        | 8,372,946  | 8,374,434  | 1,489    | CG17047        | +8578                  | CG17048        | +44613                 | 8             | 8                         | 5                 | 5                             | 3.8     |                                           |                        |
| 478 | PCE8576                | 3R        | 12,596,022 | 12,597,333 | 1,312    | CG31275        | -18893                 | Glut3          | -16717                 | 6             | 10                        | 5                 | 8                             | 3.8     |                                           |                        |
| 479 | PCE8577                | 3R        | 12,568,810 | 12,569,623 | 814      | Ubx            | -8444                  | CG31275        | +7451                  | 6             | 6                         | 7                 | 7                             | 3.8     |                                           |                        |
| 480 | PCE8578                | 2L        | 10,564,075 | 10,564,501 | 427      | CG6138         | +4377                  | CG6138         | +4377                  | 4             | 4                         | 9                 | 9                             | 3.8     |                                           |                        |
| 481 | PCE8579                | 2L        | 2,997,676  | 2,998,490  | 815      | BEST:LD23852   | +12144                 | CG17265        | -7579                  | 6             | 6                         | 7                 | 7                             | 3.8     |                                           |                        |
| 482 | PCE8580                | 2L        | 10,512,991 | 10,513,854 | 864      | Lrr47          | +3246                  | CG6113         | -7971                  | 5             | 8                         | 6                 | 9                             | 3.8     |                                           |                        |
| 483 | PCE8581                | 2L        | 16,355,350 | 16,356,517 | 1,168    | BG:DS0218.5    | +11348                 | BG:DS02780.1   | +70032                 | 6             | 9                         | 5                 | 8                             | 3.8     |                                           |                        |
| 484 | PCE8582                | 2L        | 1,929,433  | 1,930,069  | 637      | CG7337         | +17861                 | CG7337         | +17861                 | 4             | 7                         | 6                 | 11                            | 3.8     |                                           |                        |
| 485 | PCE8583                | 2L        | 11,452,927 | 11,453,606 | 680      | salm           | -18453                 | sala           | -21453                 | 5             | 6                         | 7                 | 9                             | 3.8     |                                           |                        |
| 486 | PCE8584                | 3R        | 6,351,140  | 6,351,819  | 680      | hth            | +80270                 | CG31394        | +3077                  | 5             | 6                         | 7                 | 9                             | 3.8     |                                           |                        |
| 487 | PCE8585                | 2R        | 18,154,189 | 18,155,793 | 1,605    | Gr59d          | -5452                  | Klp59C         | +13817                 | 7             | 10                        | 4                 | 6                             | 3.8     |                                           |                        |
| 488 | PCE8586                | 3R        | 3,124,600  | 3,125,781  | 1,182    | rn             | +9468                  | CG32467        | +2132                  | 6             | 9                         | 5                 | 8                             | 3.8     |                                           |                        |
| 489 | PCE8587                | 3L        | 2,821,674  | 2,822,603  | 930      | CG2083         | -40915                 | CG14952        | +5921                  | 4             | 10                        | 4                 | 11                            | 3.8     |                                           |                        |
| 490 | PCE8588                | X         | 15,857,208 | 15,857,812 | 605      | disco-r        | -2995                  | disco          | +89941                 | 3             | 8                         | 5                 | 13                            | 3.8     |                                           |                        |
| 491 | PCE8589                | 2R        | 7,087,153  | 7,087,842  | 690      | otk            | -2616                  | CG8964         | +2141                  | 5             | 6                         | 7                 | 9                             | 3.8     |                                           |                        |
| 492 | PCE8590                | 2L        | 1,702,114  | 1,703,457  | 1,344    | CG31666        | +32603                 | cpb            | -3111                  | 4             | 13                        | 3                 | 10                            | 3.8     |                                           |                        |
| 493 | PCE8591                | 3R        | 17,331,272 | 17,332,469 | 1,198    | C15            | +14332                 | CG7956         | -5157                  | 6             | 9                         | 5                 | 8                             | 3.8     |                                           |                        |
| 494 | PCE8592                | 2L        | 3,852,586  | 3,853,784  | 1,199    | slp2           | +23176                 | CG3964         | -1465                  | 6             | 9                         | 5                 | 8                             | 3.8     |                                           |                        |
| 495 | PCE8593                | 3L        | 474,796    | 475,488    | 693      | klar           | +45730                 | klar           | +45730                 | 5             | 6                         | 7                 | 9                             | 3.8     |                                           |                        |
| 496 | PCE8594                | 2L        | 5,555,971  | 5,557,603  | 1,633    | Glu-RIIB       | +4415                  | CG14011        | +15728                 | 5             | 13                        | 3                 | 8                             | 3.8     |                                           |                        |
| 497 | PCE8595                | 3R        | 23,233,906 | 23,234,406 | 501      | side           | -294                   | CG13978        | -44869                 | 4             | 5                         | 8                 | 10                            | 3.8     |                                           |                        |
| 498 | PCE8596                | 3L        | 14,869,258 | 14,870,201 | 944      | CG13467        | +16266                 | CG13466        | -378                   | 6             | 7                         | 6                 | 7                             | 3.8     |                                           |                        |
| 499 | PCE8597                | 2L        | 12,612,518 | 12,613,584 | 1,067    | nub            | +5301                  | nub            | +5301                  | 6             | 8                         | 6                 | 7                             | 3.8     |                                           |                        |
| 500 | PCE8598                | 2L        | 7,326,567  | 7,327,139  | 573      | wg             | +25247                 | Wnt6           | -15989                 | 4             | 6                         | 7                 | 10                            | 3.8     |                                           |                        |
| 501 | PCE8599                | X         | 2,568,404  | 2,569,406  | 1,003    | EG:BACR43E12.1 | +1666                  | EG:BACR43E12.7 | +60186                 | 5             | 9                         | 5                 | 9                             | 3.8     |                                           |                        |
| 502 | PCE8600                | 3L        | 10,765,390 | 10,766,595 | 1,206    | CG12523        | +6670                  | CG7958         | -48825                 | 6             | 9                         | 5                 | 7                             | 3.7     |                                           |                        |
| 503 | PCE8601                | 3R        | 6,385,173  | 6,385,786  | 614      | hth            | +45624                 | hth            | +45624                 | 5             | 5                         | 8                 | 8                             | 3.7     |                                           |                        |
| 504 | PCE8602                | 3L        | 5,182,947  | 5,184,150  | 1,204    | CG32423        | +24805                 | CG4669         | -9636                  | 4             | 12                        | 3                 | 10                            | 3.7     |                                           |                        |

| CRM | Overlaps known element | Chrom arm | pCRM start | pCRM end   | pCRM len | 5' gene        | pCRM relative position | 3' gene        | pCRM relative position | Aligned sites | Aligned + preserved sites | Aligned + preserved site dens | z-score | Additional Gap/pair-rule gene within 20kb | pCRM relative position |
|-----|------------------------|-----------|------------|------------|----------|----------------|------------------------|----------------|------------------------|---------------|---------------------------|-------------------------------|---------|-------------------------------------------|------------------------|
| 505 | PCE8603                | 2L        | 15,081,609 | 15,083,381 | 1,773    | BG:DS04929.1   | +27880                 | BG:DS04929.3   | -4288                  | 8             | 9                         | 5                             | 5       | 3.7                                       |                        |
| 506 | PCE8604                | 3L        | 3,867,701  | 3,868,315  | 615      | Awh            | +40862                 | BEST:HL04053   | -4887                  | 5             | 5                         | 8                             | 8       | 3.7                                       |                        |
| 507 | PCE8605                | 3L        | 14,748,256 | 14,748,909 | 654      | CG9425         | +7246                  | NHP2           | +2160                  | 4             | 7                         | 6                             | 11      | 3.7                                       |                        |
| 508 | PCE8606                | 3R        | 6,925,760  | 6,926,458  | 699      | CG4695         | +56049                 | CG6629         | +14988                 | 5             | 6                         | 7                             | 9       | 3.7                                       |                        |
| 509 | PCE8607                | 3L        | 621,934    | 622,549    | 616      | CG32345        | -18989                 | CG12030        | -6596                  | 5             | 5                         | 8                             | 8       | 3.7                                       |                        |
| 510 | PCE8610                | 3R        | 23,227,085 | 23,228,234 | 1,150    | CG12509        | -3840                  | side           | +5378                  | 7             | 7                         | 6                             | 6       | 3.7                                       |                        |
| 511 | PCE8611                | 2L        | 6,219,157  | 6,220,296  | 1,140    | <b>Ugt37b1</b> | +1893                  | CG9486         | -27794                 | 3             | 13                        | 3                             | 11      | 3.7                                       |                        |
| 512 | PCE8612                | 2L        | 17,285,680 | 17,286,383 | 704      | CG6380         | -15390                 | CG31804        | -55194                 | 5             | 6                         | 7                             | 9       | 3.7                                       |                        |
| 513 | PCE8613                | 3L        | 4,141,304  | 4,142,260  | 957      | CG15001        | -29                    | mas            | +5827                  | 4             | 10                        | 4                             | 10      | 3.7                                       |                        |
| 514 | PCE8615                | 3L        | 20,627,921 | 20,628,582 | 662      | <b>kni</b>     | -14020                 | CG13253        | +9154                  | 4             | 7                         | 6                             | 11      | 3.7                                       |                        |
| 515 | PCE8616                | 3L        | 14,248,363 | 14,249,388 | 1,026    | <b>fz</b>      | +25109                 | fz             | +25109                 | 5             | 9                         | 5                             | 9       | 3.7                                       |                        |
| 516 | PCE8617                | 2L        | 14,190,690 | 14,191,849 | 1,160    | smi35A         | -10665                 | wb             | -53824                 | 5             | 10                        | 4                             | 9       | 3.7                                       |                        |
| 517 | PCE8619                | 2R        | 15,484,116 | 15,485,210 | 1,095    | CG11192        | -65381                 | CG33041        | -2836                  | 6             | 8                         | 5                             | 7       | 3.7                                       |                        |
| 518 | PCE8620                | 2R        | 16,617,033 | 16,617,743 | 711      | CG10440        | -2030                  | CG30222        | -9007                  | 5             | 6                         | 7                             | 8       | 3.7                                       |                        |
| 519 | PCE8621                | 2L        | 13,925,657 | 13,926,168 | 512      | CG16885        | -8814                  | BG:DS00180.3   | +3458                  | 4             | 5                         | 8                             | 10      | 3.7                                       |                        |
| 520 | PCE8622                | 2L        | 17,513,131 | 17,513,936 | 806      | CG15145        | -3653                  | CG7094         | +19912                 | 5             | 7                         | 6                             | 9       | 3.7                                       |                        |
| 521 | PCE8623                | 2L        | 14,296,353 | 14,297,064 | 712      | CG32970        | +6045                  | wb             | +51391                 | 5             | 6                         | 7                             | 8       | 3.7                                       |                        |
| 522 | PCE8624                | 3R        | 13,644,559 | 13,645,270 | 712      | <b>CG31246</b> | +7279                  | <b>CG31246</b> | +7279                  | 5             | 6                         | 7                             | 8       | 3.7                                       |                        |
| 523 | PCE8625                | 3R        | 24,747,907 | 24,748,492 | 586      | CG11828        | +9700                  | <b>CG14521</b> | +36950                 | 4             | 6                         | 7                             | 10      | 3.7                                       |                        |
| 524 | PCE8626                | X         | 4,811,169  | 4,812,137  | 969      | <b>ovo</b>     | +6323                  | CG32767        | +9550                  | 4             | 10                        | 4                             | 10      | 3.7                                       |                        |
| 525 | PCE8627                | X         | 20,585,270 | 20,587,233 | 1,964    | CG11229        | +1175                  | CG11227        | +19264                 | 7             | 11                        | 4                             | 6       | 3.7                                       |                        |
| 526 | PCE8628                | 2L        | 1,567,014  | 1,567,727  | 714      | <b>CG14351</b> | +10190                 | <b>CG14351</b> | +10190                 | 5             | 6                         | 7                             | 8       | 3.7                                       |                        |
| 527 | PCE8629                | 3R        | 17,876,346 | 17,877,449 | 1,104    | <b>how</b>     | +17429                 | <b>how</b>     | +17429                 | 6             | 8                         | 5                             | 7       | 3.7                                       |                        |
| 528 | PCE8631                | 2L        | 4,062,649  | 4,063,364  | 716      | <b>ed</b>      | +38702                 | <b>ed</b>      | +38702                 | 5             | 6                         | 7                             | 8       | 3.7                                       |                        |
| 529 | PCE8632                | 3L        | 5,813,553  | 5,814,224  | 672      | vn             | -8631                  | CG5568         | -16585                 | 4             | 7                         | 6                             | 10      | 3.7                                       |                        |
| 530 | PCE8633                | 3R        | 19,532,259 | 19,533,374 | 1,116    | <b>nau</b>     | +1362                  | <b>nau</b>     | +1362                  | 6             | 8                         | 5                             | 7       | 3.7                                       |                        |
| 531 | PCE8634                | 3L        | 5,949,714  | 5,950,761  | 1,048    | <b>CG10479</b> | -14401                 | CG32406        | -5760                  | 5             | 9                         | 5                             | 9       | 3.6                                       |                        |
| 532 | PCE8635                | 3R        | 10,241,244 | 10,241,879 | 636      | CG14846        | -5097                  | CG14847        | +1330                  | 5             | 5                         | 8                             | 8       | 3.6                                       |                        |
| 533 | PCE8636                | X         | 13,608,841 | 13,609,517 | 677      | <b>CG32611</b> | +6654                  | <b>CG32611</b> | +6654                  | 4             | 7                         | 6                             | 10      | 3.6                                       |                        |
| 534 | PCE8637                | 3L        | 2,706,795  | 2,707,471  | 677      | <b>CG32296</b> | +39638                 | <b>CG32296</b> | +39638                 | 4             | 7                         | 6                             | 10      | 3.6                                       |                        |
| 535 | PCE8638                | 2L        | 6,079,474  | 6,080,398  | 925      | <b>Kr-h1</b>   | +3233                  | <b>Kr-h1</b>   | +3233                  | 3             | 11                        | 3                             | 12      | 3.6                                       |                        |
| 536 | PCE8639                | 3R        | 12,328,716 | 12,329,536 | 821      | decay          | -1304                  | CG11769        | -9653                  | 5             | 7                         | 6                             | 9       | 3.6                                       |                        |
| 537 | PCE8640                | 3R        | 8,901,043  | 8,901,919  | 877      | <b>sim</b>     | +2901                  | <b>sim</b>     | +2901                  | 6             | 6                         | 7                             | 7       | 3.6                                       |                        |
| 538 | PCE8641                | X         | 2,614,829  | 2,615,350  | 522      | EG:BACR43E12.1 | +48091                 | EG:BACR43E12.7 | +14242                 | 4             | 5                         | 8                             | 10      | 3.6                                       |                        |
| 539 | PCE8642                | 3R        | 14,287,449 | 14,288,813 | 1,365    | <b>fru</b>     | +25920                 | <b>fru</b>     | +25920                 | 7             | 8                         | 5                             | 6       | 3.6                                       |                        |
| 540 | PCE8643                | X         | 7,150,784  | 7,151,780  | 997      | CG32727        | +3198                  | CG9657         | -7190                  | 6             | 7                         | 6                             | 7       | 3.6                                       |                        |
| 541 | PCE8644                | 3R        | 9,293,440  | 9,294,271  | 832      | CG17025        | -1593                  | CG12538        | +55005                 | 5             | 7                         | 6                             | 8       | 3.6                                       |                        |
| 542 | PCE8645                | 3R        | 6,414,925  | 6,415,526  | 602      | <b>hth</b>     | +15884                 | <b>hth</b>     | +15884                 | 4             | 6                         | 7                             | 10      | 3.6                                       |                        |
| 543 | PCE8647                | 3R        | 21,565,329 | 21,566,272 | 944      | <b>CG4861</b>  | +1810                  | <b>CG4861</b>  | +1810                  | 5             | 8                         | 5                             | 8       | 3.6                                       |                        |
| 544 | PCE8648                | 3R        | 19,685,652 | 19,687,030 | 1,379    | <b>Pli</b>     | +19424                 | <b>Pli</b>     | +19424                 | 5             | 11                        | 4                             | 8       | 3.6                                       |                        |
| 545 | PCE8649                | 3L        | 10,744,922 | 10,745,526 | 605      | ninA           | -90519                 | CG12523        | -13194                 | 4             | 6                         | 7                             | 10      | 3.6                                       |                        |
| 546 | PCE8650                | 3R        | 13,897,919 | 13,898,867 | 949      | <b>htl</b>     | -19198                 | CG14317        | -7990                  | 5             | 8                         | 5                             | 8       | 3.6                                       |                        |
| 547 | PCE8651                | 2R        | 13,094,956 | 13,097,026 | 2,071    | CG10910        | +10974                 | CG5773         | +10452                 | 5             | 14                        | 2                             | 7       | 3.6                                       |                        |
| 548 | PCE8653                | 3R        | 675,079    | 675,817    | 739      | CG14659        | -18095                 | <b>opa</b>     | -2748                  | 5             | 6                         | 7                             | 8       | 3.6                                       |                        |
| 549 | PCE8655                | 3R        | 20,555,177 | 20,555,870 | 694      | <b>tok</b>     | +18743                 | <b>tok</b>     | +18743                 | 4             | 7                         | 6                             | 10      | 3.6                                       | <b>tld</b>             |
| 550 | PCE8656                | X         | 2,168,910  | 2,169,699  | 790      | EG:BACH7M4.4   | -1239                  | CG32797        | +12778                 | 4             | 8                         | 5                             | 10      | 3.6                                       | <b>gt</b>              |
| 551 | PCE8657                | 3L        | 7,428,357  | 7,429,051  | 695      | Tsp66A         | +1288                  | CG8543         | +713                   | 4             | 7                         | 6                             | 10      | 3.6                                       |                        |
| 552 | PCE8658                | 2L        | 2,385,887  | 2,386,499  | 613      | CG3557         | -7528                  | CG9887         | -6373                  | 4             | 6                         | 7                             | 10      | 3.6                                       |                        |
| 553 | PCE8659                | 2L        | 4,580,752  | 4,581,992  | 1,241    | CG15636        | -10080                 | CG15635        | -53692                 | 5             | 10                        | 4                             | 8       | 3.6                                       |                        |
| 554 | PCE8660                | 3L        | 13,231,546 | 13,232,578 | 1,033    | <b>caps</b>    | +45311                 | <b>caps</b>    | +45311                 | 6             | 7                         | 6                             | 7       | 3.5                                       |                        |
| 555 | PCE8661                | 2L        | 17,019,639 | 17,020,887 | 1,249    | CG6304         | -28501                 | CG15136        | +5178                  | 5             | 10                        | 4                             | 8       | 3.5                                       |                        |
| 556 | PCE8662                | 2L        | 20,255,372 | 20,256,226 | 855      | CG17570        | -21332                 | CG12617        | -8221                  | 5             | 7                         | 6                             | 8       | 3.5                                       |                        |
| 557 | PCE8663                | 2L        | 15,603,380 | 15,604,236 | 857      | Or35a          | -1738                  | BG:BACR44L22.6 | -2531                  | 5             | 7                         | 6                             | 8       | 3.5                                       |                        |
| 558 | PCE8665                | 3R        | 3,995,668  | 3,996,708  | 1,041    | <b>grn</b>     | +10471                 | <b>grn</b>     | +10471                 | 6             | 7                         | 6                             | 7       | 3.5                                       |                        |
| 559 | PCE8666                | 3L        | 10,205,744 | 10,206,406 | 663      | Or67c          | -3509                  | can            | +18234                 | 5             | 5                         | 8                             | 8       | 3.5                                       |                        |
| 560 | PCE8668                | 2R        | 14,906,372 | 14,907,718 | 1,347    | Toll-7         | +15755                 | Obp56i         | -24110                 | 6             | 9                         | 4                             | 7       | 3.5                                       |                        |
| 561 | PCE8669                | 3L        | 7,924,102  | 7,924,570  | 469      | <b>exex</b>    | +16382                 | RNaseX25       | -5553                  | 4             | 4                         | 9                             | 9       | 3.5                                       |                        |
| 562 | PCE8670                | 3L        | 5,977,156  | 5,978,265  | 1,110    | CG10478        | -6897                  | <b>CG32406</b> | +21744                 | 5             | 9                         | 5                             | 8       | 3.5                                       |                        |
| 563 | PCE8671                | 2L        | 10,888,242 | 10,889,219 | 978      | CG14071        | -7055                  | CG14070        | +4885                  | 5             | 8                         | 5                             | 8       | 3.5                                       |                        |
| 564 | PCE8672                | 3R        | 18,010,835 | 18,011,500 | 666      | <b>CG31163</b> | +60292                 | <b>CG31163</b> | +60292                 | 5             | 5                         | 8                             | 8       | 3.5                                       |                        |
| 565 | PCE8673                | X         | 19,537,088 | 19,537,895 | 808      | CG12701        | -23200                 | skpD           | -5793                  | 4             | 8                         | 5                             | 10      | 3.5                                       |                        |
| 566 | PCE8674                | 2L        | 706,502    | 707,044    | 543      | <b>ds</b>      | +9589                  | <b>ds</b>      | +9589                  | 4             | 5                         | 7                             | 9       | 3.5                                       |                        |
| 567 | PCE8675                | 3L        | 2,971,680  | 2,973,339  | 1,660    | CG2107         | +10021                 | CG2113         | -2469                  | 7             | 9                         | 4                             | 5       | 3.5                                       |                        |

| CRM | Overlaps known element | Chrom arm | pCRM start | pCRM end   | pCRM len | 5' gene          | pCRM relative position | 3' gene          | pCRM relative position | Aligned sites | Aligned + preserved sites | Aligned site dens | Aligned + preserved site dens | z-score | Additional Gap/pair-rule gene within 20kb | pCRM relative position |
|-----|------------------------|-----------|------------|------------|----------|------------------|------------------------|------------------|------------------------|---------------|---------------------------|-------------------|-------------------------------|---------|-------------------------------------------|------------------------|
| 568 | PCE8676                | 3R        | 7,169,670  | 7,170,381  | 712      | CG31386          | -48672                 | KP78b            | +3800                  | 4             | 7                         | 6                 | 10                            | 3.5     |                                           |                        |
| 569 | PCE8677                | 3L        | 4,901,455  | 4,902,168  | 714      | Rh50             | +13129                 | CG32233          | -25223                 | 4             | 7                         | 6                 | 10                            | 3.5     |                                           |                        |
| 570 | PCE8678                | X         | 3,804,896  | 3,806,094  | 1,199    | CG6414           | -92932                 | CG32790          | -12437                 | 6             | 8                         | 5                 | 7                             | 3.5     |                                           |                        |
| 571 | PCE8679                | 2L        | 3,816,761  | 3,817,475  | 715      | CG3407           | -10785                 | <b>slp1</b>      | -773                   | 4             | 7                         | 6                 | 10                            | 3.5     | <b>slp2</b>                               | -12649                 |
| 572 | PCE8680                | 3L        | 12,536,054 | 12,536,768 | 715      | CG10632          | -5985                  | <b>ara</b>       | -1452                  | 4             | 7                         | 6                 | 10                            | 3.5     |                                           |                        |
| 573 | PCE8682                | X         | 8,498,395  | 8,499,112  | 718      | <b>Lim1</b>      | +45662                 | <b>Lim1</b>      | +45662                 | 4             | 7                         | 6                 | 10                            | 3.5     |                                           |                        |
| 574 | PCE8683                | 3R        | 21,742,370 | 21,743,501 | 1,132    | CG6111           | -1341                  | CG14547          | +13211                 | 5             | 9                         | 4                 | 8                             | 3.5     |                                           |                        |
| 575 | PCE8684                | 3L        | 7,422,400  | 7,424,500  | 2,101    | CG8546           | +6843                  | Tsp66A           | -1498                  | 8             | 9                         | 4                 | 4                             | 3.5     |                                           |                        |
| 576 | PCE8685                | 2L        | 17,208,032 | 17,208,749 | 718      | <b>beat-IIIc</b> | +30066                 | <b>beat-IIIc</b> | +30066                 | 2             | 10                        | 3                 | 14                            | 3.5     |                                           |                        |
| 577 | PCE8686                | 2L        | 16,901,929 | 16,902,560 | 632      | CG4841           | +13168                 | <b>beat-IIIb</b> | -60178                 | 4             | 6                         | 6                 | 9                             | 3.5     |                                           |                        |
| 578 | PCE8688                | 2L        | 14,661,352 | 14,662,733 | 1,382    | <b>osp</b>       | +8733                  | <b>osp</b>       | +8733                  | 4             | 12                        | 3                 | 9                             | 3.5     |                                           |                        |
| 579 | PCE8689                | 2L        | 9,367,850  | 9,369,333  | 1,484    | CG13111          | -2024                  | CG4450           | +7986                  | 5             | 11                        | 3                 | 7                             | 3.5     |                                           |                        |
| 580 | PCE8690                | 2R        | 11,099,400 | 11,100,076 | 677      | <b>SP2353</b>    | +3716                  | <b>SP2353</b>    | +3716                  | 3             | 8                         | 4                 | 12                            | 3.5     |                                           |                        |
| 581 | PCE8691                | X         | 8,532,373  | 8,533,595  | 1,223    | <b>Lim1</b>      | +11179                 | <b>Lim1</b>      | +11179                 | 4             | 11                        | 3                 | 9                             | 3.4     |                                           |                        |
| 582 | PCE8692                | 2R        | 10,858,897 | 10,859,846 | 950      | CG30321          | +1849                  | <b>CG30084</b>   | +18792                 | 6             | 6                         | 6                 | 6                             | 3.4     |                                           |                        |
| 583 | PCE8693                | 3R        | 19,312,384 | 19,313,067 | 684      | CG17382          | +8271                  | lrk2             | +21625                 | 5             | 5                         | 7                 | 7                             | 3.4     |                                           |                        |
| 584 | PCE8694                | 3R        | 19,436,740 | 19,437,891 | 1,152    | <b>CG31145</b>   | +48144                 | <b>CG31145</b>   | +48144                 | 5             | 9                         | 4                 | 8                             | 3.4     |                                           |                        |
| 585 | PCE8695                | 3R        | 24,749,544 | 24,750,228 | 685      | CG11828          | +11337                 | <b>CG14521</b>   | +35214                 | 5             | 5                         | 7                 | 7                             | 3.4     |                                           |                        |
| 586 | PCE8696                | 2L        | 15,176,099 | 15,176,990 | 892      | BG:DS03192.2     | -19694                 | BG:DS07295.1     | +47013                 | 5             | 7                         | 6                 | 8                             | 3.4     |                                           |                        |
| 587 | PCE8697                | 2L        | 4,101,077  | 4,102,158  | 1,082    | <b>ed</b>        | +77130                 | <b>ed</b>        | +77130                 | 4             | 10                        | 4                 | 9                             | 3.4     |                                           |                        |
| 588 | PCE8698                | 2L        | 11,476,016 | 11,477,334 | 1,319    | <b>sala</b>      | +957                   | CG6488           | +10656                 | 5             | 10                        | 4                 | 8                             | 3.4     |                                           |                        |
| 589 | PCE8699                | 2R        | 14,074,331 | 14,075,114 | 784      | CG15105          | +19577                 | 5-HT1B           | +17583                 | 5             | 6                         | 6                 | 8                             | 3.4     |                                           |                        |
| 590 | PCE8700                | 2L        | 3,629,528  | 3,630,422  | 895      | <b>for</b>       | +2067                  | <b>for</b>       | +2067                  | 5             | 7                         | 6                 | 8                             | 3.4     |                                           |                        |
| 591 | PCE8701                | X         | 7,383,732  | 7,384,465  | 734      | <b>ct</b>        | +11130                 | <b>ct</b>        | +11130                 | 4             | 7                         | 5                 | 10                            | 3.4     |                                           |                        |
| 592 | PCE8702                | 3R        | 3,274,891  | 3,275,786  | 896      | CG14598          | +9385                  | alpha-Est10      | +39026                 | 5             | 7                         | 6                 | 8                             | 3.4     |                                           |                        |
| 593 | PCE8703                | 2L        | 1,599,447  | 1,600,773  | 1,327    | <b>CG31935</b>   | +12018                 | <b>CG31935</b>   | +12018                 | 5             | 10                        | 4                 | 8                             | 3.4     |                                           |                        |
| 594 | PCE8705                | X         | 20,203,680 | 20,204,324 | 645      | Tak1             | -5956                  | CG32504          | +1493                  | 4             | 6                         | 6                 | 9                             | 3.4     |                                           |                        |
| 595 | PCE8706                | 2L        | 5,426,216  | 5,426,907  | 692      | H15              | +29660                 | CG31647          | +4585                  | 5             | 5                         | 7                 | 7                             | 3.4     |                                           |                        |
| 596 | PCE8707                | 3L        | 11,825,298 | 11,825,991 | 694      | CG14129          | -4588                  | CG5906           | +2862                  | 5             | 5                         | 7                 | 7                             | 3.4     |                                           |                        |
| 597 | PCE8708                | 2R        | 7,330,030  | 7,330,677  | 648      | <b>Cam</b>       | +758                   | <b>Cam</b>       | +758                   | 4             | 6                         | 6                 | 9                             | 3.4     |                                           |                        |
| 598 | PCE8709                | 3R        | 15,895,707 | 15,896,448 | 742      | CG4390           | -10203                 | Rh3              | +11741                 | 4             | 7                         | 5                 | 9                             | 3.4     |                                           |                        |
| 599 | PCE8710                | 3R        | 15,807,348 | 15,808,255 | 908      | CG31213          | +8097                  | <b>Hs6st</b>     | +26006                 | 5             | 7                         | 6                 | 8                             | 3.4     |                                           |                        |
| 600 | PCE8711                | 3L        | 2,796,072  | 2,797,251  | 1,180    | CG2083           | -15313                 | CG14952          | +31273                 | 5             | 9                         | 4                 | 8                             | 3.4     |                                           |                        |
| 601 | PCE8712                | 2L        | 8,740,307  | 8,741,050  | 744      | <b>raw</b>       | -7443                  | CG12438          | -3580                  | 4             | 7                         | 5                 | 9                             | 3.4     |                                           |                        |
| 602 | PCE8713                | 3L        | 16,350,279 | 16,351,939 | 1,661    | CG13035          | -1343                  | fax              | +5385                  | 6             | 10                        | 4                 | 6                             | 3.4     |                                           |                        |
| 603 | PCE8714                | 2R        | 6,137,844  | 6,139,028  | 1,185    | CG17326          | -81535                 | CG13235          | -6749                  | 5             | 9                         | 4                 | 8                             | 3.4     |                                           |                        |
| 604 | PCE8715                | 3R        | 10,251,806 | 10,252,457 | 652      | CG14843          | +5508                  | CG31330          | +6463                  | 4             | 6                         | 6                 | 9                             | 3.4     |                                           |                        |
| 605 | PCE8716                | 3R        | 6,020,697  | 6,021,349  | 653      | <b>Syn</b>       | +1095                  | <b>Syn</b>       | +1095                  | 4             | 6                         | 6                 | 9                             | 3.4     |                                           |                        |
| 606 | PCE8717                | 2L        | 19,575,634 | 19,576,288 | 655      | CG10366          | +13293                 | Lar              | -13204                 | 4             | 6                         | 6                 | 9                             | 3.4     |                                           |                        |
| 607 | PCE8718                | X         | 7,210,892  | 7,211,594  | 703      | CG11368          | +18308                 | CG32719          | +14626                 | 5             | 5                         | 7                 | 7                             | 3.4     |                                           |                        |
| 608 | PCE8719                | X         | 12,023,854 | 12,025,667 | 1,814    | <b>Ten-a</b>     | +63167                 | <b>Ten-a</b>     | +63167                 | 7             | 9                         | 4                 | 5                             | 3.4     |                                           |                        |
| 609 | PCE8720                | 2R        | 17,064,846 | 17,065,896 | 1,051    | <b>CG13499</b>   | +17086                 | <b>CG13499</b>   | +17086                 | 5             | 8                         | 5                 | 8                             | 3.4     |                                           |                        |
| 610 | PCE8721                | 2L        | 18,345,794 | 18,346,655 | 862      | Acp36DE          | -8685                  | <b>Fas3</b>      | +48472                 | 4             | 8                         | 5                 | 9                             | 3.4     |                                           |                        |
| 611 | PCE8722                | 3L        | 13,573,722 | 13,574,380 | 659      | <b>bru-3</b>     | +49937                 | <b>bru-3</b>     | +49937                 | 4             | 6                         | 6                 | 9                             | 3.4     |                                           |                        |
| 612 | PCE8723                | 2L        | 18,597,305 | 18,598,229 | 925      | <b>MESR3</b>     | +1966                  | <b>MESR3</b>     | +1966                  | 5             | 7                         | 5                 | 8                             | 3.4     |                                           |                        |
| 613 | PCE8724                | 2R        | 3,332,619  | 3,333,375  | 757      | CG30371          | -2564                  | CG30358          | -47218                 | 4             | 7                         | 5                 | 9                             | 3.3     |                                           |                        |
| 614 | PCE8725                | 3L        | 10,486,389 | 10,487,146 | 758      | <b>CG32062</b>   | +12856                 | <b>CG32062</b>   | +12856                 | 4             | 7                         | 5                 | 9                             | 3.3     |                                           |                        |
| 615 | PCE8726                | 3R        | 17,753,035 | 17,754,421 | 1,387    | CG31171          | -3529                  | Eip93F           | -37890                 | 5             | 10                        | 4                 | 7                             | 3.3     |                                           |                        |
| 616 | PCE8727                | 3R        | 9,152,882  | 9,153,545  | 664      | <b>CG32473</b>   | +17756                 | CG8795           | +6359                  | 4             | 6                         | 6                 | 9                             | 3.3     |                                           |                        |
| 617 | PCE8728                | 2R        | 18,216,678 | 18,218,161 | 1,484    | <b>CG30188</b>   | +96                    | CG13548          | +2072                  | 4             | 12                        | 3                 | 8                             | 3.3     |                                           |                        |
| 618 | PCE8729                | 3R        | 2,401,337  | 2,402,049  | 713      | <b>CG33202</b>   | +17716                 | CG2336           | -4527                  | 5             | 5                         | 7                 | 7                             | 3.3     |                                           |                        |
| 619 | PCE8730                | 2L        | 4,149,970  | 4,151,033  | 1,064    | CG2955           | +8123                  | Or24a            | +7637                  | 5             | 8                         | 5                 | 8                             | 3.3     |                                           |                        |
| 620 | PCE8731                | X         | 13,677,033 | 13,678,097 | 1,065    | CG32606          | -31270                 | CG11068          | -7812                  | 5             | 8                         | 5                 | 8                             | 3.3     |                                           |                        |
| 621 | PCE8732                | 3R        | 26,643,616 | 26,644,432 | 817      | <b>CG15544</b>   | +679                   | <b>CG15544</b>   | +679                   | 5             | 6                         | 6                 | 7                             | 3.3     |                                           |                        |
| 622 | PCE8733                | 2L        | 13,562,988 | 13,563,860 | 873      | <b>kuz</b>       | +30697                 | <b>kuz</b>       | +30697                 | 4             | 8                         | 5                 | 9                             | 3.3     |                                           |                        |
| 623 | PCE8734                | 3R        | 9,766,472  | 9,767,187  | 716      | <b>ems</b>       | +38873                 | CG9929           | +1956                  | 5             | 5                         | 7                 | 7                             | 3.3     |                                           |                        |
| 624 | PCE8735                | 2L        | 7,528,873  | 7,529,536  | 664      | CG13789          | -54                    | CG13790          | +31513                 | 2             | 9                         | 3                 | 14                            | 3.3     |                                           |                        |
| 625 | PCE8736                | 3R        | 18,613,312 | 18,614,025 | 714      | CG7029           | +12451                 | CG7031           | -6643                  | 3             | 8                         | 4                 | 11                            | 3.3     |                                           |                        |
| 626 | PCE8737                | 3R        | 15,770,642 | 15,771,644 | 1,003    | <b>mira</b>      | -9783                  | CG4783           | -2564                  | 4             | 9                         | 4                 | 9                             | 3.3     |                                           |                        |
| 627 | PCE8738                | X         | 17,841,850 | 17,842,791 | 942      | <b>wupA</b>      | +2896                  | <b>wupA</b>      | +2896                  | 5             | 7                         | 5                 | 7                             | 3.3     |                                           |                        |
| 628 | PCE8739                | X         | 19,501,097 | 19,502,252 | 1,156    | CG12702          | -7814                  | CG12701          | +11304                 | 6             | 7                         | 5                 | 6                             | 3.3     |                                           |                        |
| 629 | PCE8741                | 3R        | 24,756,547 | 24,757,269 | 723      | <b>CG14521</b>   | +28173                 | <b>CG14521</b>   | +28173                 | 5             | 5                         | 7                 | 7                             | 3.3     |                                           |                        |
| 630 | PCE8743                | 3L        | 20,859,949 | 20,860,629 | 681      | <b>fng</b>       | +6156                  | <b>fng</b>       | +6156                  | 4             | 6                         | 6                 | 9                             | 3.3     |                                           |                        |

| CRM | Overlaps known element | Chrom arm | pCRM start | pCRM end   | pCRM len | 5' gene             | pCRM relative position | 3' gene             | pCRM relative position | Aligned sites | Aligned + preserved sites | Aligned site dens | Aligned + preserved site dens | z-score | Additional Gap/pair-rule gene within 20kb | pCRM relative position |
|-----|------------------------|-----------|------------|------------|----------|---------------------|------------------------|---------------------|------------------------|---------------|---------------------------|-------------------|-------------------------------|---------|-------------------------------------------|------------------------|
| 631 | PCE8744                | 3L        | 7,254,218  | 7,254,999  | 782      | unc-13-4A           | -9702                  | CG8607              | -24599                 | 4             | 7                         | 5                 | 9                             | 3.3     |                                           |                        |
| 632 | PCE8745                | 3L        | 15,974,355 | 15,974,946 | 592      | CG5841              | -13664                 | Notum               | -3320                  | 4             | 5                         | 7                 | 8                             | 3.3     |                                           |                        |
| 633 | PCE8746                | 3R        | 7,878,145  | 7,878,985  | 841      | CG14739             | -3192                  | CG14740             | +9700                  | 5             | 6                         | 6                 | 7                             | 3.3     |                                           |                        |
| 634 | PCE8747                | 3L        | 18,389,353 | 18,390,136 | 784      | skl                 | -537                   | CG32196             | +19059                 | 4             | 7                         | 5                 | 9                             | 3.3     |                                           |                        |
| 635 | PCE8748                | 3L        | 7,155,396  | 7,156,129  | 734      | CG32387             | -11965                 | CG14826             | -38183                 | 5             | 5                         | 7                 | 7                             | 3.3     |                                           |                        |
| 636 | PCE8749                | 3R        | 12,547,814 | 12,548,778 | 965      | <b>Ubx</b>          | +11588                 | <b>Ubx</b>          | +11588                 | 5             | 7                         | 5                 | 7                             | 3.3     |                                           |                        |
| 637 | PCE8750                | 2L        | 21,722,836 | 21,723,621 | 786      | <b>tsh</b>          | +61121                 | CG11629             | +7761                  | 4             | 7                         | 5                 | 9                             | 3.3     |                                           |                        |
| 638 | PCE8751                | X         | 8,582,666  | 8,584,615  | 1,950    | CG32710             | +24446                 | CG12075             | -18496                 | 5             | 12                        | 3                 | 6                             | 3.2     |                                           |                        |
| 639 | PCE8752                | 2L        | 5,340,183  | 5,340,779  | 597      | <b>nompC</b>        | +1376                  | <b>nompC</b>        | +1376                  | 4             | 5                         | 7                 | 8                             | 3.2     |                                           |                        |
| 640 | PCE8753                | 2R        | 15,156,019 | 15,156,707 | 689      | CG16898             | -87320                 | <b>18w</b>          | -18515                 | 4             | 6                         | 6                 | 9                             | 3.2     |                                           |                        |
| 641 | PCE8755                | 3L        | 18,378,400 | 18,379,089 | 690      | rpr                 | -31118                 | skl                 | +9727                  | 4             | 6                         | 6                 | 9                             | 3.2     |                                           |                        |
| 642 | PCE8756                | X         | 7,114,744  | 7,115,343  | 600      | <u>CG1677</u>       | +31393                 | CG15033             | -3296                  | 4             | 5                         | 7                 | 8                             | 3.2     |                                           |                        |
| 643 | PCE8757                | 2R        | 9,860,958  | 9,861,476  | 519      | <b>kn</b>           | +1722                  | CG12856             | -528                   | 4             | 4                         | 8                 | 8                             | 3.2     |                                           |                        |
| 644 | PCE8759                | 3L        | 18,732,240 | 18,733,155 | 916      | <u>ftz-f1</u>       | +14455                 | <u>ftz-f1</u>       | +14455                 | 4             | 8                         | 4                 | 9                             | 3.2     |                                           |                        |
| 645 | PCE8760                | X         | 12,098,612 | 12,099,309 | 698      | Ten-a               | +137925                | CG2577              | -4561                  | 4             | 6                         | 6                 | 9                             | 3.2     |                                           |                        |
| 646 | PCE8761                | 3L        | 561,185    | 561,886    | 702      | CG17090             | +34486                 | CG12169             | -79                    | 4             | 6                         | 6                 | 9                             | 3.2     |                                           |                        |
| 647 | PCE8763                | 2L        | 15,921,132 | 15,921,743 | 612      | <u>BG:DS07486.4</u> | +1489                  | <u>BG:DS07486.4</u> | +1489                  | 4             | 5                         | 7                 | 8                             | 3.2     |                                           |                        |
| 648 | PCE8764                | X         | 4,534,933  | 4,535,934  | 1,002    | CG6978              | +10123                 | CG2861              | +8380                  | 5             | 7                         | 5                 | 7                             | 3.2     |                                           |                        |
| 649 | PCE8765                | 2L        | 12,649,899 | 12,650,970 | 1,072    | <b>pdm2</b>         | +3201                  | <b>pdm2</b>         | +3201                  | 4             | 9                         | 4                 | 8                             | 3.2     |                                           |                        |
| 650 | PCE8767                | 3L        | 3,569,765  | 3,571,304  | 1,540    | <u>Eip63E</u>       | +43815                 | <u>Eip63E</u>       | +43815                 | 7             | 7                         | 5                 | 5                             | 3.2     |                                           |                        |
| 651 | PCE8768                | 3L        | 14,054,118 | 14,055,058 | 941      | <u>Sox21a</u>       | +896                   | <u>Sox21a</u>       | +896                   | 4             | 8                         | 4                 | 9                             | 3.2     |                                           |                        |
| 652 | PCE8769                | 3R        | 21,313,461 | 21,314,032 | 572      | CG5112              | +6885                  | CG5107              | -6267                  | 3             | 6                         | 5                 | 10                            | 3.2     |                                           |                        |
| 653 | PCE8771                | 2L        | 3,678,899  | 3,679,911  | 1,013    | CG2808              | +2630                  | CG10017             | -2978                  | 5             | 7                         | 5                 | 7                             | 3.2     |                                           |                        |
| 654 | PCE8772                | 2L        | 14,180,071 | 14,181,083 | 1,013    | smi35A              | -46                    | wb                  | -64590                 | 5             | 7                         | 5                 | 7                             | 3.2     |                                           |                        |
| 655 | PCE8773                | 2R        | 3,849,469  | 3,850,633  | 1,165    | BcDNA:GH05582       | +39723                 | CG8746              | -2746                  | 5             | 8                         | 4                 | 7                             | 3.1     |                                           |                        |
| 656 | PCE8774                | 3R        | 24,446,054 | 24,446,822 | 769      | <u>CG10011</u>      | +3329                  | <u>CG10011</u>      | +3329                  | 5             | 5                         | 7                 | 7                             | 3.1     |                                           |                        |
| 657 | PCE8775                | 2L        | 4,273,064  | 4,273,778  | 715      | CG3675              | -1205                  | tutl                | -1941                  | 4             | 6                         | 6                 | 8                             | 3.1     |                                           |                        |
| 658 | PCE8776                | 2L        | 600,954    | 601,726    | 773      | <b>Gsc</b>          | -4602                  | CG13689             | -3050                  | 5             | 5                         | 6                 | 6                             | 3.1     |                                           |                        |
| 659 | PCE8777                | 2L        | 18,912,810 | 18,914,163 | 1,354    | <u>CG18397</u>      | +7868                  | <u>CG18397</u>      | +7868                  | 5             | 9                         | 4                 | 7                             | 3.1     |                                           |                        |
| 660 | PCE8778                | 2L        | 12,920,116 | 12,920,836 | 721      | ACXE                | +5628                  | CG16800             | -34863                 | 4             | 6                         | 6                 | 8                             | 3.1     |                                           |                        |
| 661 | PCE8779                | 2L        | 11,711,164 | 11,712,191 | 1,028    | CG4988              | +27438                 | CG12602             | -15631                 | 5             | 7                         | 5                 | 7                             | 3.1     |                                           |                        |
| 662 | PCE8781                | 3R        | 8,443,786  | 8,444,682  | 897      | CG18553             | -57091                 | CG31355             | -2672                  | 5             | 6                         | 6                 | 7                             | 3.1     |                                           |                        |
| 663 | PCE8782                | 3R        | 12,722,692 | 12,723,803 | 1,112    | CG10349             | +17228                 | CG31270             | +25719                 | 6             | 6                         | 5                 | 5                             | 3.1     |                                           |                        |
| 664 | PCE8783                | 3L        | 13,505,475 | 13,506,016 | 542      | <u>bru-3</u>        | +118301                | <u>bru-3</u>        | +118301                | 4             | 4                         | 7                 | 7                             | 3.1     |                                           |                        |
| 665 | PCE8784                | 2R        | 10,985,716 | 10,986,555 | 840      | slf                 | -31137                 | CG8291              | +5500                  | 4             | 7                         | 5                 | 8                             | 3.1     |                                           |                        |
| 666 | PCE8786                | 2R        | 11,608,905 | 11,610,022 | 1,118    | CG4750              | +10202                 | Syn2                | -5962                  | 6             | 6                         | 5                 | 5                             | 3.1     |                                           |                        |
| 667 | PCE8787                | 3R        | 16,708,448 | 16,709,735 | 1,288    | TotZ                | +4974                  | CG10830             | +13324                 | 6             | 7                         | 5                 | 5                             | 3.1     |                                           |                        |
| 668 | PCE8788                | X         | 11,274,796 | 11,276,520 | 1,725    | <u>CG32666</u>      | +39688                 | <u>CG32666</u>      | +39688                 | 6             | 9                         | 3                 | 5                             | 3.1     |                                           |                        |
| 669 | PCE8789                | 3R        | 10,412,310 | 10,413,906 | 1,597    | CG7987              | -10722                 | stumps              | -4296                  | 5             | 10                        | 3                 | 6                             | 3.1     | <b>CG8066</b>                             | -17760                 |
| 670 | PCE8791                | X         | 5,889,580  | 5,890,212  | 633      | Ca-alpha1T          | -3816                  | CG32750             | +46581                 | 4             | 5                         | 6                 | 8                             | 3.1     |                                           |                        |
| 671 | PCE8792                | 2R        | 9,858,755  | 9,859,662  | 908      | <b>kn</b>           | +3925                  | CG12856             | -2342                  | 5             | 6                         | 6                 | 7                             | 3.1     |                                           |                        |
| 672 | PCE8793                | 3R        | 3,422,212  | 3,423,115  | 904      | CG32465             | -15206                 | CG14597             | +6367                  | 3             | 9                         | 3                 | 10                            | 3.1     |                                           |                        |
| 673 | PCE8794                | 3R        | 4,957,708  | 4,958,341  | 634      | <b>pum</b>          | +24747                 | <b>pum</b>          | +24747                 | 4             | 5                         | 6                 | 8                             | 3.1     |                                           |                        |
| 674 | PCE8795                | 3R        | 18,844,072 | 18,844,706 | 635      | lmd                 | -981                   | CG13833             | +7179                  | 4             | 5                         | 6                 | 8                             | 3.1     |                                           |                        |
| 675 | PCE8796                | X         | 18,734,114 | 18,734,846 | 733      | <u>CG32541</u>      | +72798                 | <u>CG32541</u>      | +72798                 | 2             | 9                         | 3                 | 12                            | 3.1     |                                           |                        |
| 676 | PCE8797                | 2L        | 13,547,490 | 13,548,287 | 798      | <b>kuz</b>          | +15199                 | <b>kuz</b>          | +15199                 | 5             | 5                         | 6                 | 6                             | 3.1     |                                           |                        |
| 677 | PCE8798                | 3R        | 27,451,745 | 27,452,886 | 1,142    | CG1800              | +18681                 | CG1804              | -21119                 | 4             | 9                         | 4                 | 8                             | 3.0     |                                           |                        |
| 678 | PCE8799                | 2L        | 12,892,807 | 12,894,341 | 1,535    | kek1                | -81150                 | ACXC                | -7058                  | 6             | 8                         | 4                 | 5                             | 3.0     |                                           |                        |
| 679 | PCE8800                | 3L        | 18,357,706 | 18,358,774 | 1,069    | rpr                 | -10424                 | skl                 | +30042                 | 5             | 7                         | 5                 | 7                             | 3.0     |                                           |                        |
| 680 | PCE8801                | 2L        | 8,327,828  | 8,328,472  | 645      | CG14275             | +6548                  | CG14274             | -3960                  | 4             | 5                         | 6                 | 8                             | 3.0     |                                           |                        |
| 681 | PCE8802                | 2R        | 15,555,002 | 15,555,696 | 695      | CG30143             | +19750                 | Obp57c              | -11571                 | 3             | 7                         | 4                 | 10                            | 3.0     |                                           |                        |
| 682 | PCE8803                | 3L        | 2,814,343  | 2,815,671  | 1,329    | CG2083              | -33584                 | CG14952             | +12853                 | 4             | 10                        | 3                 | 8                             | 3.0     |                                           |                        |
| 683 | PCE8804                | 3R        | 14,816,598 | 14,819,095 | 2,498    | <b>gukh</b>         | +6835                  | <b>gukh</b>         | +6835                  | 6             | 11                        | 2                 | 4                             | 3.0     |                                           |                        |
| 684 | PCE8805                | X         | 7,135,635  | 7,136,875  | 1,241    | <u>CG1677</u>       | +10502                 | CG15035             | +6676                  | 5             | 8                         | 4                 | 6                             | 3.0     |                                           |                        |
| 685 | PCE8806                | 3L        | 9,529,914  | 9,530,990  | 1,077    | <u>CG32048</u>      | +10088                 | <u>CG32048</u>      | +10088                 | 5             | 7                         | 5                 | 6                             | 3.0     |                                           |                        |
| 686 | PCE8807                | 3L        | 7,787,714  | 7,788,868  | 1,155    | <u>Pdp1</u>         | +1457                  | <u>Pdp1</u>         | +1457                  | 4             | 9                         | 3                 | 8                             | 3.0     |                                           |                        |
| 687 | PCE8808                | 2R        | 17,039,753 | 17,040,755 | 1,003    | CG30405             | -588                   | CG13499             | +42227                 | 4             | 8                         | 4                 | 8                             | 3.0     |                                           |                        |
| 688 | PCE8809                | 3R        | 5,304,512  | 5,305,592  | 1,081    | CG16779             | -2991                  | CG8147              | -14948                 | 5             | 7                         | 5                 | 6                             | 3.0     |                                           |                        |
| 689 | PCE8810                | 2R        | 7,839,090  | 7,839,843  | 754      | CG12374             | +12266                 | sca                 | -5414                  | 4             | 6                         | 5                 | 8                             | 3.0     |                                           |                        |
| 690 | PCE8811                | 2L        | 7,461,446  | 7,462,525  | 1,080    | <u>CG6055</u>       | +2666                  | <u>CG6055</u>       | +2666                  | 3             | 10                        | 3                 | 9                             | 3.0     |                                           |                        |
| 691 | PCE8812                | 3L        | 12,933,673 | 12,934,759 | 1,087    | CG10749             | +3653                  | CG11262             | -17922                 | 5             | 7                         | 5                 | 6                             | 3.0     |                                           |                        |
| 692 | PCE8813                | 3R        | 6,104,608  | 6,105,261  | 654      | <u>CG11870</u>      | +11114                 | <u>CG11870</u>      | +11114                 | 4             | 5                         | 6                 | 8                             | 3.0     |                                           |                        |
| 693 | PCE8814                | X         | 4,942,026  | 4,942,901  | 876      | CG15464             | +14280                 | rg                  | -18943                 | 4             | 7                         | 5                 | 8                             | 3.0     |                                           |                        |

| CRM | Overlaps known element | Chrom arm | pCRM start | pCRM end   | pCRM len | 5' gene      | pCRM relative position | 3' gene    | pCRM relative position | Aligned sites | Aligned + preserved sites | Aligned site dens | Aligned + preserved site dens | z-score | Additional Gap/pair-rule gene within 20kb | pCRM relative position |
|-----|------------------------|-----------|------------|------------|----------|--------------|------------------------|------------|------------------------|---------------|---------------------------|-------------------|-------------------------------|---------|-------------------------------------------|------------------------|
| 694 | PCE8815                | 2L        | 4,129,758  | 4,130,519  | 762      | Sr-CI        | +15469                 | CG2955     | -11328                 | 4             | 6                         | 5                 | 8                             | 3.0     |                                           |                        |
| 695 | PCE8816                | X         | 7,308,243  | 7,309,337  | 1,095    | CG32720      | -30977                 | CG11369    | -5637                  | 5             | 7                         | 5                 | 6                             | 3.0     |                                           |                        |
| 696 | PCE8817                | 3R        | 9,398,335  | 9,399,433  | 1,099    | CG31337      | -27210                 | CG14370    | -14494                 | 5             | 7                         | 5                 | 6                             | 3.0     |                                           |                        |
| 697 | PCE8818                | 2R        | 16,838,007 | 16,838,666 | 660      | lox2         | -2801                  | CG18735    | +4051                  | 4             | 5                         | 6                 | 8                             | 3.0     |                                           |                        |
| 698 | PCE8819                | 2L        | 5,226,813  | 5,228,290  | 1,478    | tkv          | +1639                  | tkv        | +1639                  | 5             | 9                         | 3                 | 6                             | 3.0     |                                           |                        |
| 699 | PCE8820                | 3L        | 19,382,749 | 19,383,316 | 568      | CG32206      | -20978                 | CG33062    | +11946                 | 4             | 4                         | 7                 | 7                             | 3.0     |                                           |                        |
| 700 | PCE8821                | X         | 14,266,464 | 14,267,571 | 1,108    | fz           | +43210                 | fz         | +43210                 | 5             | 7                         | 5                 | 6                             | 3.0     |                                           |                        |
| 701 | PCE8822                | 3L        | 8,122,301  | 8,123,407  | 1,107    | nAcRalpha-7E | -53677                 | CG1387     | -1319                  | 3             | 10                        | 3                 | 9                             | 3.0     |                                           |                        |
| 702 | PCE8824                | 3L        | 14,854,028 | 14,854,802 | 775      | CG13467      | +1036                  | CG13466    | -15777                 | 4             | 6                         | 5                 | 8                             | 3.0     |                                           |                        |
| 703 | PCE8825                | 2R        | 10,684,893 | 10,685,730 | 838      | CG30465      | +14902                 | fus        | +43063                 | 5             | 5                         | 6                 | 6                             | 3.0     |                                           |                        |
| 704 | PCE8826                | 3L        | 22,759,170 | 22,759,946 | 777      | CG11226      | +4825                  | CG32462    | +10844                 | 4             | 6                         | 5                 | 8                             | 3.0     |                                           |                        |
| 705 | PCE8827                | 3L        | 12,828,922 | 12,830,219 | 1,298    | CG10943      | -8657                  | CG14120    | -12379                 | 5             | 8                         | 4                 | 6                             | 3.0     |                                           |                        |
| 706 | PCE8828                | 3R        | 15,192,208 | 15,193,724 | 1,517    | DI           | -40256                 | CG3581     | +6764                  | 5             | 9                         | 3                 | 6                             | 2.9     |                                           |                        |
| 707 | PCE8829                | 3L        | 2,199,533  | 2,200,661  | 1,129    | CG15878      | -6401                  | CG13809    | -9613                  | 5             | 7                         | 4                 | 6                             | 2.9     |                                           |                        |
| 708 | PCE8830                | 2L        | 13,992,126 | 13,992,703 | 578      | rk           | -8722                  | bgm        | -3196                  | 4             | 4                         | 7                 | 7                             | 2.9     |                                           |                        |
| 709 | PCE8831                | 3R        | 16,251,146 | 16,252,195 | 1,050    | CG10881      | +17143                 | CG17208    | +11468                 | 4             | 8                         | 4                 | 8                             | 2.9     |                                           |                        |
| 710 | PCE8832                | 3L        | 4,358,243  | 4,358,919  | 677      | CG18314      | +1150                  | CG18314    | +1150                  | 4             | 5                         | 6                 | 7                             | 2.9     |                                           |                        |
| 711 | PCE8833                | 3R        | 9,406,850  | 9,407,638  | 789      | CG31337      | -35725                 | CG14370    | -6289                  | 4             | 6                         | 5                 | 8                             | 2.9     |                                           |                        |
| 712 | PCE8834                | 3L        | 6,008,609  | 6,009,288  | 680      | CG6467       | +10145                 | CG6483     | -793                   | 4             | 5                         | 6                 | 7                             | 2.9     |                                           |                        |
| 713 | PCE8835                | 3R        | 14,089,456 | 14,090,136 | 681      | CG31241      | +8189                  | CG18599    | -3389                  | 4             | 5                         | 6                 | 7                             | 2.9     |                                           |                        |
| 714 | PCE8836                | 2L        | 18,855,255 | 18,855,935 | 681      | tup          | +3404                  | tup        | +3404                  | 4             | 5                         | 6                 | 7                             | 2.9     |                                           |                        |
| 715 | PCE8837                | 3R        | 6,768,536  | 6,769,119  | 584      | CG6621       | -49266                 | CG4683     | -6939                  | 4             | 4                         | 7                 | 7                             | 2.9     |                                           |                        |
| 716 | PCE8838                | 2R        | 19,345,433 | 19,346,672 | 1,240    | CG3394       | +6348                  | betaTub60D | -2777                  | 6             | 6                         | 5                 | 5                             | 2.9     |                                           |                        |
| 717 | PCE8839                | 3L        | 18,396,715 | 18,397,508 | 794      | skl          | -7899                  | CG32196    | +11687                 | 4             | 6                         | 5                 | 8                             | 2.9     |                                           |                        |
| 718 | PCE8840                | X         | 3,401,018  | 3,402,260  | 1,243    | A1stR        | +68044                 | A1stR      | +68044                 | 4             | 9                         | 3                 | 7                             | 2.9     |                                           |                        |
| 719 | PCE8841                | 3R        | 4,219,718  | 4,220,404  | 687      | CG31264      | +3319                  | CG31264    | +3319                  | 4             | 5                         | 6                 | 7                             | 2.9     |                                           |                        |
| 720 | PCE8842                | 3R        | 24,993,421 | 24,994,109 | 689      | CG11898      | +12541                 | CG14509    | +15973                 | 4             | 5                         | 6                 | 7                             | 2.9     |                                           |                        |
| 721 | PCE8843                | 2L        | 9,705,516  | 9,706,106  | 591      | CG4364       | -2018                  | Nckx30C    | +32587                 | 4             | 4                         | 7                 | 7                             | 2.9     |                                           |                        |
| 722 | PCE8844                | 3L        | 22,083,500 | 22,084,305 | 806      | CG15374      | +796                   | olf413     | -16737                 | 4             | 6                         | 5                 | 7                             | 2.9     |                                           |                        |
| 723 | PCE8845                | 3L        | 18,893,491 | 18,894,184 | 694      | CG32204      | +731                   | CG32204    | +731                   | 4             | 5                         | 6                 | 7                             | 2.9     |                                           |                        |
| 724 | PCE8846                | 3R        | 12,776,906 | 12,777,842 | 937      | Abd-B        | +6900                  | Abd-B      | +6900                  | 4             | 7                         | 4                 | 7                             | 2.9     |                                           |                        |
| 725 | PCE8847                | 3L        | 16,584,358 | 16,585,622 | 1,265    | Ab1          | +11831                 | Ab1        | +11831                 | 4             | 9                         | 3                 | 7                             | 2.9     |                                           |                        |
| 726 | PCE8850                | 2L        | 2,013,055  | 2,013,869  | 815      | CG15361      | +2861                  | CG4238     | -11838                 | 4             | 6                         | 5                 | 7                             | 2.8     |                                           |                        |
| 727 | PCE8851                | 2L        | 17,064,215 | 17,065,029 | 815      | CG15136      | -38150                 | CG12620    | -781                   | 4             | 6                         | 5                 | 7                             | 2.8     |                                           |                        |
| 728 | PCE8852                | 3R        | 25,333,346 | 25,334,048 | 703      | CG2014       | +2414                  | Dr         | -37426                 | 4             | 5                         | 6                 | 7                             | 2.8     |                                           |                        |
| 729 | PCE8853                | 3R        | 26,747,640 | 26,748,342 | 703      | Ptx1         | +9222                  | CG15549    | +3253                  | 4             | 5                         | 6                 | 7                             | 2.8     |                                           |                        |
| 730 | PCE8854                | 3L        | 12,831,188 | 12,831,893 | 706      | CG10943      | -10923                 | CG14120    | -10705                 | 4             | 5                         | 6                 | 7                             | 2.8     |                                           |                        |
| 731 | PCE8855                | 3R        | 6,452,909  | 6,453,618  | 710      | hth          | +10786                 | hth        | +10786                 | 4             | 5                         | 6                 | 7                             | 2.8     |                                           |                        |
| 732 | PCE8856                | 2L        | 14,876,621 | 14,877,515 | 895      | Mst35Bb      | -14822                 | CG15277    | +10336                 | 5             | 5                         | 6                 | 6                             | 2.8     |                                           |                        |
| 733 | PCE8857                | X         | 9,142,970  | 9,144,624  | 1,655    | CG12654      | -19750                 | CG12650    | -6051                  | 5             | 9                         | 3                 | 5                             | 2.8     |                                           |                        |
| 734 | PCE8858                | 2R        | 3,413,989  | 3,415,032  | 1,044    | CG14755      | +5704                  | CG11635    | -3840                  | 5             | 6                         | 5                 | 6                             | 2.8     |                                           |                        |
| 735 | PCE8859                | 3R        | 6,450,885  | 6,451,851  | 967      | hth          | +10894                 | hth        | +10894                 | 4             | 7                         | 4                 | 7                             | 2.8     |                                           |                        |
| 736 | PCE8860                | X         | 13,602,891 | 13,603,605 | 715      | CG32611      | +12566                 | CG32611    | +12566                 | 4             | 5                         | 6                 | 7                             | 2.8     |                                           |                        |
| 737 | PCE8861                | 3L        | 13,613,780 | 13,614,495 | 716      | bru-3        | +9822                  | bru-3      | +9822                  | 4             | 5                         | 6                 | 7                             | 2.8     |                                           |                        |
| 738 | PCE8862                | 3L        | 14,283,029 | 14,283,745 | 717      | CG13482      | +4713                  | fz         | +60491                 | 4             | 5                         | 6                 | 7                             | 2.8     |                                           |                        |
| 739 | PCE8863                | X         | 6,787,027  | 6,788,250  | 1,224    | CG14427      | +6044                  | nullo      | -1546                  | 5             | 7                         | 4                 | 6                             | 2.8     |                                           |                        |
| 740 | PCE8864                | 3L        | 19,392,191 | 19,392,803 | 613      | CG33062      | +2459                  | CG33062    | +2459                  | 4             | 4                         | 7                 | 7                             | 2.8     |                                           |                        |
| 741 | PCE8865                | 3R        | 23,630,245 | 23,630,963 | 719      | CG12873      | -10734                 | CG5566     | +18243                 | 4             | 5                         | 6                 | 7                             | 2.8     |                                           |                        |
| 742 | PCE8866                | 2L        | 4,009,211  | 4,009,929  | 719      | CG10039      | +8940                  | ed         | -14018                 | 4             | 5                         | 6                 | 7                             | 2.8     |                                           |                        |
| 743 | PCE8867                | 3L        | 14,119,875 | 14,120,593 | 719      | Sox21b       | -39671                 | D          | +6907                  | 4             | 5                         | 6                 | 7                             | 2.8     |                                           |                        |
| 744 | PCE8868                | 3R        | 26,453,042 | 26,454,720 | 1,679    | CG2267       | -8926                  | CG31013    | +6201                  | 5             | 9                         | 3                 | 5                             | 2.8     |                                           |                        |
| 745 | PCE8870                | 3L        | 6,075,327  | 6,076,048  | 722      | Ets65A       | +4805                  | Ets65A     | +4805                  | 4             | 5                         | 6                 | 7                             | 2.8     |                                           |                        |
| 746 | PCE8871                | X         | 15,130,520 | 15,131,250 | 731      | cnql         | +230                   | cnql       | +230                   | 4             | 5                         | 5                 | 7                             | 2.8     |                                           |                        |
| 747 | PCE8872                | 2L        | 5,138,812  | 5,139,545  | 734      | Msp-300      | +3096                  | Msp-300    | +3096                  | 4             | 5                         | 5                 | 7                             | 2.7     |                                           |                        |
| 748 | PCE8873                | X         | 3,801,447  | 3,802,375  | 929      | CG6414       | -89483                 | CG32790    | -16156                 | 5             | 5                         | 5                 | 5                             | 2.7     |                                           |                        |
| 749 | PCE8875                | 3R        | 15,955,901 | 15,956,639 | 739      | Gr92a        | +9103                  | CG5023     | -38535                 | 4             | 5                         | 5                 | 7                             | 2.7     |                                           |                        |
| 750 | PCE8876                | 3L        | 1,883,948  | 1,884,812  | 865      | CG1887       | -5664                  | CG13925    | -17231                 | 4             | 6                         | 5                 | 7                             | 2.7     |                                           |                        |
| 751 | PCE8877                | 3R        | 19,231,318 | 19,232,499 | 1,182    | CG4374       | -2332                  | CG31225    | -65846                 | 4             | 8                         | 3                 | 7                             | 2.7     |                                           |                        |
| 752 | PCE8878                | 3R        | 27,123,447 | 27,124,728 | 1,282    | CG11340      | -3277                  | CG11339    | -41430                 | 5             | 7                         | 4                 | 5                             | 2.7     |                                           |                        |
| 753 | PCE8879                | X         | 4,501,964  | 4,503,260  | 1,297    | CG12683      | -9728                  | CG15472    | +7427                  | 5             | 7                         | 4                 | 5                             | 2.7     |                                           |                        |
| 754 | PCE8880                | X         | 16,347,988 | 16,348,737 | 750      | CG9782       | +3869                  | CG9782     | +3869                  | 4             | 5                         | 5                 | 7                             | 2.7     |                                           |                        |
| 755 | PCE8881                | 3L        | 15,147,956 | 15,148,982 | 1,027    | CG7011       | -35453                 | CG6888     | -7740                  | 4             | 7                         | 4                 | 7                             | 2.7     |                                           |                        |
| 756 | PCE8882                | 3R        | 14,837,689 | 14,838,329 | 641      | gukh         | +27926                 | gukh       | +27926                 | 4             | 4                         | 6                 | 6                             | 2.7     |                                           |                        |

| CRM | Overlaps known element | Chrom arm | pCRM start | pCRM end   | pCRM len | 5' gene             | pCRM relative position | 3' gene             | pCRM relative position | Aligned sites | Aligned + preserved sites | Aligned site dens | Aligned + preserved site dens | z-score | Additional Gap/pair-rule gene within 20kb | pCRM relative position |
|-----|------------------------|-----------|------------|------------|----------|---------------------|------------------------|---------------------|------------------------|---------------|---------------------------|-------------------|-------------------------------|---------|-------------------------------------------|------------------------|
| 757 | PCE8883                | X         | 12,038,914 | 12,039,566 | 643      | Ten-a               | +78227                 | Ten-a               | +78227                 | 4             | 4                         | 6                 | 6                             | 2.7     |                                           |                        |
| 758 | PCE8884                | 3R        | 9,428,725  | 9,429,369  | 645      | CG14369             | -10370                 | CG9759              | +5618                  | 4             | 4                         | 6                 | 6                             | 2.7     |                                           |                        |
| 759 | PCE8885                | 2L        | 16,198,026 | 16,198,725 | 700      | BG:DS02795.3        | +8484                  | BG:DS07473.1        | -13525                 | 3             | 6                         | 4                 | 9                             | 2.7     |                                           |                        |
| 760 | PCE8886                | 3L        | 5,957,304  | 5,958,995  | 1,692    | <u>CG32406</u>      | +783                   | <u>CG32406</u>      | +783                   | 4             | 10                        | 2                 | 6                             | 2.7     |                                           |                        |
| 761 | PCE8887                | 2L        | 17,133,997 | 17,134,893 | 897      | CG31784             | -30038                 | beat-IIIa           | -1751                  | 4             | 6                         | 4                 | 7                             | 2.7     |                                           |                        |
| 762 | PCE8888                | 3L        | 5,937,286  | 5,937,942  | 657      | <b>CG10479</b>      | -1973                  | CG32406             | -18579                 | 4             | 4                         | 6                 | 6                             | 2.6     |                                           |                        |
| 763 | PCE8889                | 3L        | 10,971,954 | 10,972,729 | 776      | klu                 | -5598                  | Fad2                | -8341                  | 4             | 5                         | 5                 | 6                             | 2.6     |                                           |                        |
| 764 | PCE8890                | X         | 18,310,580 | 18,311,489 | 910      | Bx                  | +13285                 | CG15040             | +32043                 | 4             | 6                         | 4                 | 7                             | 2.6     |                                           |                        |
| 765 | PCE8891                | X         | 20,593,919 | 20,594,525 | 607      | CG11229             | +9824                  | CG11227             | +11972                 | 3             | 5                         | 5                 | 8                             | 2.6     |                                           |                        |
| 766 | PCE8892                | 3L        | 3,949,014  | 3,949,675  | 662      | CG12605             | -3614                  | scrt                | -14869                 | 4             | 4                         | 6                 | 6                             | 2.6     |                                           |                        |
| 767 | PCE8893                | 3R        | 6,945,867  | 6,947,122  | 1,256    | CG6629              | -4421                  | Ugt86Dd             | +7058                  | 4             | 8                         | 3                 | 6                             | 2.6     |                                           |                        |
| 768 | PCE8894                | X         | 2,653,986  | 2,655,142  | 1,157    | EG:BACR43E12.4      | +3980                  | EG:100G7.6          | -21398                 | 3             | 9                         | 3                 | 8                             | 2.6     |                                           |                        |
| 769 | PCE8895                | 2L        | 1,848,412  | 1,849,322  | 911      | <u>CG31665</u>      | +3749                  | <u>CG31665</u>      | +3749                  | 2             | 9                         | 2                 | 10                            | 2.6     |                                           |                        |
| 770 | PCE8896                | 3R        | 26,491,392 | 26,492,056 | 665      | CG15541             | +27138                 | CG1342              | -13675                 | 4             | 4                         | 6                 | 6                             | 2.6     |                                           |                        |
| 771 | PCE8897                | 2L        | 3,732,905  | 3,734,168  | 1,264    | Shaw                | +22150                 | CG10019             | -4092                  | 4             | 8                         | 3                 | 6                             | 2.6     |                                           |                        |
| 772 | PCE8898                | X         | 2,719,029  | 2,719,695  | 667      | <b>rst</b>          | +10908                 | <b>rst</b>          | +10908                 | 4             | 4                         | 6                 | 6                             | 2.6     |                                           |                        |
| 773 | PCE8900                | 2R        | 20,176,889 | 20,177,557 | 669      | CG30430             | +3888                  | <b>Tkr</b>          | +5554                  | 4             | 4                         | 6                 | 6                             | 2.6     |                                           |                        |
| 774 | PCE8901                | 2L        | 14,469,880 | 14,470,807 | 928      | BG:DS08340.1        | -36912                 | <b>noc</b>          | -2206                  | 4             | 6                         | 4                 | 6                             | 2.6     |                                           |                        |
| 775 | PCE8902                | 3R        | 26,917,836 | 26,918,508 | 673      | CG15553             | -1674                  | CG11318             | +5768                  | 4             | 4                         | 6                 | 6                             | 2.6     |                                           |                        |
| 776 | PCE8903                | 2L        | 7,324,059  | 7,324,852  | 794      | <b>wg</b>           | +22739                 | Wnt6                | -18276                 | 4             | 5                         | 5                 | 6                             | 2.6     |                                           |                        |
| 777 | PCE8904                | 3R        | 25,226,334 | 25,227,007 | 674      | Cnx99A              | -91602                 | CG11516             | -14782                 | 4             | 4                         | 6                 | 6                             | 2.6     |                                           |                        |
| 778 | PCE8905                | 3L        | 13,244,630 | 13,245,918 | 1,289    | caps                | +58395                 | Acp70A              | -13284                 | 4             | 8                         | 3                 | 6                             | 2.6     |                                           |                        |
| 779 | PCE8906                | X         | 19,669,743 | 19,670,680 | 938      | Nep3                | +11996                 | CG17003             | +27475                 | 4             | 6                         | 4                 | 6                             | 2.6     |                                           |                        |
| 780 | PCE8907                | X         | 15,344,721 | 15,345,398 | 678      | <u>sog</u>          | +12833                 | CG32586             | -7508                  | 4             | 4                         | 6                 | 6                             | 2.6     |                                           |                        |
| 781 | PCE8908                | 3R        | 4,019,218  | 4,020,017  | 800      | <b>grn</b>          | -12039                 | CG7800              | -23697                 | 4             | 5                         | 5                 | 6                             | 2.6     |                                           |                        |
| 782 | PCE8909                | X         | 8,016,087  | 8,016,823  | 737      | CG1636              | +3692                  | nAcRalpha-7E        | +51801                 | 3             | 6                         | 4                 | 8                             | 2.6     |                                           |                        |
| 783 | PCE8910                | 3L        | 14,199,837 | 14,200,945 | 1,109    | CG7906              | +14234                 | fz                  | -22281                 | 4             | 7                         | 4                 | 6                             | 2.6     |                                           |                        |
| 784 | PCE8911                | 3L        | 3,946,239  | 3,947,364  | 1,126    | CG12605             | -839                   | scrt                | -17180                 | 4             | 7                         | 4                 | 6                             | 2.5     |                                           |                        |
| 785 | PCE8914                | 3R        | 5,682,722  | 5,683,950  | 1,229    | <u>CG12806</u>      | +9908                  | <u>CG12806</u>      | +9908                  | 3             | 9                         | 2                 | 7                             | 2.5     | <b>CG12802</b>                            | -18690                 |
| 786 | PCE8915                | 3R        | 12,378,599 | 12,379,564 | 966      | CG14888             | +2823                  | <b>CG14889</b>      | -2330                  | 4             | 6                         | 4                 | 6                             | 2.5     |                                           |                        |
| 787 | PCE8916                | 2L        | 3,833,662  | 3,834,807  | 1,146    | <b>slp2</b>         | +4252                  | CG3964              | -20442                 | 4             | 7                         | 3                 | 6                             | 2.5     | <b>slp1</b>                               | 15414                  |
| 788 | PCE8917                | 2L        | 11,324,065 | 11,324,894 | 830      | CG14925             | -49591                 | CG14926             | +7240                  | 4             | 5                         | 5                 | 6                             | 2.5     |                                           |                        |
| 789 | PCE8918                | 2L        | 7,551,823  | 7,552,522  | 700      | CG13789             | -23004                 | CG13790             | +8527                  | 2             | 7                         | 3                 | 10                            | 2.5     |                                           |                        |
| 790 | PCE8919                | 2R        | 4,089,350  | 4,090,057  | 708      | <u>CG8170</u>       | +1731                  | <u>CG8170</u>       | +1731                  | 4             | 4                         | 6                 | 6                             | 2.5     |                                           |                        |
| 791 | PCE8920                | 2R        | 14,915,041 | 14,915,750 | 710      | Toll-7              | +24424                 | Obp56i              | -16078                 | 4             | 4                         | 6                 | 6                             | 2.5     |                                           |                        |
| 792 | PCE8921                | 3L        | 7,251,704  | 7,252,543  | 840      | unc-13-4A           | -7188                  | CG8607              | -27055                 | 4             | 5                         | 5                 | 6                             | 2.5     |                                           |                        |
| 793 | PCE8922                | 2L        | 12,376,190 | 12,377,031 | 842      | <u>bru-2</u>        | +39170                 | <u>bru-2</u>        | +39170                 | 4             | 5                         | 5                 | 6                             | 2.5     |                                           |                        |
| 794 | PCE8923                | 2L        | 13,663,800 | 13,664,511 | 712      | <u>CG31814</u>      | +34951                 | <u>CG31814</u>      | +34951                 | 4             | 4                         | 6                 | 6                             | 2.5     |                                           |                        |
| 795 | PCE8924                | 3L        | 5,443,034  | 5,443,749  | 716      | CG4835              | +3591                  | CG10630             | +14489                 | 4             | 4                         | 6                 | 6                             | 2.5     |                                           |                        |
| 796 | PCE8925                | 3R        | 18,927,474 | 18,928,569 | 1,096    | <u>CG13830</u>      | +524                   | <u>CG13830</u>      | +524                   | 5             | 5                         | 5                 | 5                             | 2.4     | <b>cenB1A</b>                             | -7306                  |
| 797 | PCE8926                | 2R        | 3,366,090  | 3,366,950  | 861      | CG30371             | -36035                 | CG30358             | -13643                 | 4             | 5                         | 5                 | 6                             | 2.4     |                                           |                        |
| 798 | PCE8927                | 2R        | 5,555,339  | 5,556,356  | 1,018    | <i>lola</i>         | +38626                 | <i>lola</i>         | +38626                 | 4             | 6                         | 4                 | 6                             | 2.4     |                                           |                        |
| 799 | PCE8929                | X         | 15,081,220 | 15,082,529 | 1,310    | CG6227              | +5088                  | Pp1-13C             | +9546                  | 3             | 9                         | 2                 | 7                             | 2.4     |                                           |                        |
| 800 | PCE8931                | 3L        | 8,207,182  | 8,208,236  | 1,055    | CG7213              | -7995                  | CG13673             | -1233                  | 4             | 6                         | 4                 | 6                             | 2.4     |                                           |                        |
| 801 | PCE8932                | 2L        | 11,734,391 | 11,735,449 | 1,059    | CG12602             | +6569                  | CG14931             | -42097                 | 4             | 6                         | 4                 | 6                             | 2.4     |                                           |                        |
| 802 | PCE8934                | 3L        | 21,149,023 | 21,150,411 | 1,389    | <u>Eip78C</u>       | +4829                  | <u>Eip78C</u>       | +4829                  | 5             | 6                         | 4                 | 4                             | 2.3     |                                           |                        |
| 803 | PCE8935                | 3L        | 13,013,902 | 13,015,182 | 1,281    | CG11279             | +9332                  | CG14115             | +3759                  | 4             | 7                         | 3                 | 5                             | 2.3     |                                           |                        |
| 804 | PCE8936                | 2R        | 17,504,143 | 17,505,050 | 908      | CG10972             | +33115                 | CG10384             | -4970                  | 4             | 5                         | 4                 | 6                             | 2.3     |                                           |                        |
| 805 | PCE8937                | 2R        | 2,066,819  | 2,067,904  | 1,086    | BcDNA:LD21503       | +6389                  | CG1153              | -6809                  | 4             | 6                         | 4                 | 6                             | 2.3     |                                           |                        |
| 806 | PCE8938                | 3L        | 5,930,568  | 5,931,337  | 770      | <b>CG10479</b>      | +3976                  | <b>CG10479</b>      | +3976                  | 4             | 4                         | 5                 | 5                             | 2.3     |                                           |                        |
| 807 | PCE8939                | 3R        | 13,252,568 | 13,253,666 | 1,099    | <u>CG5873</u>       | +1060                  | <u>CG5873</u>       | +1060                  | 4             | 6                         | 4                 | 5                             | 2.3     |                                           |                        |
| 808 | PCE8941                | 3R        | 4,927,969  | 4,929,073  | 1,105    | <i>pum</i>          | +54015                 | <i>pum</i>          | +54015                 | 4             | 6                         | 4                 | 5                             | 2.3     |                                           |                        |
| 809 | PCE8942                | X         | 14,855,281 | 14,856,212 | 932      | Cyp4s3              | -7728                  | CG32589             | -556                   | 4             | 5                         | 4                 | 5                             | 2.3     |                                           |                        |
| 810 | PCE8943                | 3R        | 26,131,482 | 26,132,420 | 939      | <i>hdc</i>          | +38461                 | <i>hdc</i>          | +38461                 | 4             | 5                         | 4                 | 5                             | 2.3     |                                           |                        |
| 811 | PCE8944                | 3R        | 26,798,410 | 26,799,352 | 943      | <u>5-HT7</u>        | +33525                 | CG31008             | +5742                  | 4             | 5                         | 4                 | 5                             | 2.3     |                                           |                        |
| 812 | PCE8945                | 3L        | 2,834,299  | 2,835,914  | 1,616    | CG14952             | -5775                  | CG9973              | +16425                 | 4             | 8                         | 2                 | 5                             | 2.3     |                                           |                        |
| 813 | PCE8946                | 2L        | 14,750,365 | 14,751,153 | 789      | BG:DS06874.3        | +6374                  | CG4650              | +1874                  | 2             | 7                         | 3                 | 9                             | 2.3     |                                           |                        |
| 814 | PCE8947                | X         | 11,955,066 | 11,956,855 | 1,790    | CG12720             | +28636                 | Ten-a               | -3832                  | 5             | 7                         | 3                 | 4                             | 2.2     |                                           |                        |
| 815 | PCE8948                | 2L        | 14,098,226 | 14,099,579 | 1,354    | CG31769             | -5335                  | CG15292             | +9738                  | 4             | 7                         | 3                 | 5                             | 2.2     |                                           |                        |
| 816 | PCE8949                | 2R        | 7,161,647  | 7,162,781  | 1,135    | <i>ieb</i>          | +20804                 | <i>ieb</i>          | +20804                 | 4             | 6                         | 4                 | 5                             | 2.2     |                                           |                        |
| 817 | PCE8950                | 2L        | 16,386,675 | 16,387,635 | 961      | <b>BG:DS02780.1</b> | +38914                 | <b>BG:DS02780.1</b> | +38914                 | 4             | 5                         | 4                 | 5                             | 2.2     |                                           |                        |
| 818 | PCE8951                | 2R        | 18,231,835 | 18,232,712 | 878      | CG13539             | +3860                  | CG3162              | +22395                 | 3             | 6                         | 3                 | 7                             | 2.2     |                                           |                        |
| 819 | PCE8952                | X         | 8,134,297  | 8,135,991  | 1,695    | CG1387              | +9571                  | CG15345             | +1216                  | 2             | 11                        | 1                 | 6                             | 2.2     |                                           |                        |

| CRM | Overlaps known element | Chrom arm | pCRM start | pCRM end   | pCRM len | 5' gene               | pCRM relative position | 3' gene               | pCRM relative position | Aligned sites | Aligned + preserved sites | Aligned site dens | Aligned + preserved site dens | z-score | Additional Gap/pair-rule gene within 20kb | pCRM relative position |
|-----|------------------------|-----------|------------|------------|----------|-----------------------|------------------------|-----------------------|------------------------|---------------|---------------------------|-------------------|-------------------------------|---------|-------------------------------------------|------------------------|
| 820 | PCE8953                | 2R        | 15,520,245 | 15,521,068 | 824      | <u>CG33041</u>        | +32199                 | <u>CG33041</u>        | +32199                 | 4             | 4                         | 5                 | 5                             | 2.2     |                                           |                        |
| 821 | PCE8954                | 2R        | 14,868,501 | 14,869,689 | 1,189    | <u>Obp56g</u>         | -20768                 | <u>Obp56h</u>         | -9600                  | 4             | 6                         | 3                 | 5                             | 2.2     |                                           |                        |
| 822 | PCE8955                | 2L        | 1,543,570  | 1,544,651  | 1,082    | <u>Or22b</u>          | +19214                 | <u>CG14351</u>        | -12173                 | 1             | 10                        | 1                 | 9                             | 2.2     |                                           |                        |
| 823 | PCE8957                | 3L        | 4,581,676  | 4,582,520  | 845      | <u>Src64B</u>         | +21617                 | <u>Src64B</u>         | +21617                 | 4             | 4                         | 5                 | 5                             | 2.1     |                                           |                        |
| 824 | PCE8959                | 2L        | 7,537,895  | 7,539,321  | 1,427    | <u>CG13789</u>        | -9076                  | <u>CG13790</u>        | +21728                 | 1             | 11                        | 1                 | 8                             | 2.0     |                                           |                        |
| 825 | PCE8960                | 3L        | 19,616,696 | 19,617,795 | 1,100    | <u>CG8780</u>         | -3076                  | <u>CG8765</u>         | +19521                 | 4             | 5                         | 4                 | 5                             | 2.0     |                                           |                        |
| 826 | PCE8961                | 3L        | 1,683,801  | 1,684,917  | 1,117    | <u>CG13931</u>        | -1289                  | <u>CG13932</u>        | +5992                  | 4             | 5                         | 4                 | 4                             | 2.0     |                                           |                        |
| 827 | PCE8962                | 2L        | 4,756,465  | 4,757,387  | 923      | <u>CG15630</u>        | +29224                 | <u>CG15630</u>        | +29224                 | 4             | 4                         | 4                 | 4                             | 2.0     |                                           |                        |
| 828 | PCE8963                | 2R        | 10,196,306 | 10,197,443 | 1,138    | <b><u>CG11798</u></b> | +3666                  | <b><u>CG11798</u></b> | +3666                  | 4             | 5                         | 4                 | 4                             | 2.0     |                                           |                        |
| 829 | PCE8964                | 2R        | 12,685,374 | 12,687,335 | 1,962    | <u>CG10936</u>        | +17485                 | <u>rhi</u>            | +9902                  | 3             | 9                         | 2                 | 5                             | 1.9     |                                           |                        |
| 830 | PCE8965                | 2L        | 6,991,437  | 6,992,512  | 1,076    | <u>SP1070</u>         | -14193                 | <u>CG13776</u>        | -13214                 | 1             | 9                         | 1                 | 8                             | 1.9     |                                           |                        |
| 831 | PCE8966                | X         | 9,200,819  | 9,201,869  | 1,051    | <u>CG15316</u>        | +33303                 | <u>CG15316</u>        | +33303                 | 4             | 4                         | 4                 | 4                             | 1.8     |                                           |                        |
| 832 | PCE8967                | 3R        | 15,827,785 | 15,829,246 | 1,462    | <u>Hs6st</u>          | +5015                  | <u>Hs6st</u>          | +5015                  | 3             | 7                         | 2                 | 5                             | 1.8     |                                           |                        |
| 833 | PCE8968                | X         | 6,862,124  | 6,862,833  | 710      | <u>fz4</u>            | -11456                 | <u>CG32729</u>        | -67271                 | 2             | 5                         | 3                 | 7                             | 1.8     |                                           |                        |
| 834 | PCE8969                | X         | 11,939,954 | 11,941,308 | 1,355    | <u>CG12720</u>        | +13524                 | <u>Ten-a</u>          | -19379                 | 4             | 5                         | 3                 | 4                             | 1.7     |                                           |                        |
| 835 | PCE8970                | X         | 12,120,594 | 12,121,734 | 1,141    | <u>CG15732</u>        | -12179                 | <u>CG32651</u>        | +17331                 | 4             | 4                         | 4                 | 4                             | 1.7     |                                           |                        |
| 836 | PCE8971                | 3R        | 18,049,626 | 18,051,202 | 1,577    | <u>CG31163</u>        | +43431                 | <u>CG31163</u>        | +43431                 | 4             | 5                         | 3                 | 3                             | 1.6     |                                           |                        |
| 837 | PCE8972                | X         | 8,523,578  | 8,525,143  | 1,566    | <u>Lim1</u>           | +19631                 | <u>Lim1</u>           | +19631                 | 2             | 8                         | 1                 | 5                             | 1.6     |                                           |                        |
| 838 | PCE8973                | 2R        | 11,097,437 | 11,098,713 | 1,277    | <u>SP2353</u>         | +1753                  | <u>SP2353</u>         | +1753                  | 2             | 7                         | 2                 | 5                             | 1.6     |                                           |                        |
| 839 | PCE8974                | 2L        | 9,166,153  | 9,167,435  | 1,283    | <u>tai</u>            | +7121                  | <u>tai</u>            | +7121                  | 2             | 7                         | 2                 | 5                             | 1.5     |                                           |                        |
| 840 | PCE8975                | X         | 19,716,382 | 19,717,478 | 1,097    | <u>DD2R</u>           | -6529                  | <u>CG9569</u>         | +7448                  | 2             | 6                         | 2                 | 5                             | 1.5     |                                           |                        |
| 841 | PCE8976                | X         | 4,772,129  | 4,773,172  | 1,044    | <u>CG12680</u>        | +33782                 | <b><u>ovo</u></b>     | -15738                 | 1             | 6                         | 1                 | 6                             | 1.1     |                                           |                        |
| 842 | PCE8978                | 3R        | 4,974,678  | 4,975,780  | 1,103    | <u>pum</u>            | +7308                  | <u>pum</u>            | +7308                  | 1             | 5                         | 1                 | 5                             | 0.8     |                                           |                        |
