# Supplementary material for: Computational identification of developmental enhancers: conservation and function of transcription factor binding-site clusters in Drosophila melanogaster and Drosophila pseudoobscura
Source: Springer Nature journal article supplement (doi:10.1186/gb-2004-5-9-r61), 2004-08-20
Supplement: Additional file 8 [file gb-2004-5-9-r61-s8.pdf]

| CRM | Overlaps known element | Chrom arm | pCRM start | pCRM end   | pCRM len | 5' gene       | pCRM relative position | 3' gene      | pCRM relative position | Aligned sites | Aligned + preserved sites | Aligned + preserved site dens | z-score | Additional Gap/pair-rule gene within 20kb | pCRM relative position |
|-----|------------------------|-----------|------------|------------|----------|---------------|------------------------|--------------|------------------------|---------------|---------------------------|-------------------------------|---------|-------------------------------------------|------------------------|
| 1   | PCE8058                | 2L        | 15,190,185 | 15,192,070 | 1,886    | BG:DS03192.2  | -33780                 | BG:DS07295.1 | +31933                 | 17            | 20                        | 9                             | 11      | 9.1                                       |                        |
| 2   | PCE8062                | 3R        | 17,769,675 | 17,771,377 | 1,703    | CG31171       | -20169                 | Eip93F       | -20934                 | 13            | 23                        | 8                             | 14      | 8.8                                       |                        |
| 3   | PCE8079                | 3L        | 19,144,705 | 19,145,326 | 622      | <b>fz2</b>    | -25200                 | mRpl21       | +58610                 | 9             | 9                         | 14                            | 14      | 7.5                                       |                        |
| 4   | PCE8082                | 3R        | 11,423,413 | 11,426,281 | 2,869    | CG18516       | -44901                 | CG5302       | -32341                 | 15            | 20                        | 5                             | 7       | 7.3                                       |                        |
| 5   | PCE8090                | X         | 4,230,105  | 4,230,679  | 575      | bi            | +76634                 | CG12685      | -25550                 | 7             | 10                        | 12                            | 17      | 7.1                                       |                        |
| 6   | PCE8098                | X         | 1,293,402  | 1,294,046  | 645      | EG:196F3.2    | +22907                 | EG:56G7.1    | +20898                 | 8             | 9                         | 12                            | 14      | 6.8                                       |                        |
| 7   | PCE8101                | 3L        | 19,148,678 | 19,149,172 | 495      | <b>fz2</b>    | -29173                 | mRpl21       | +54764                 | 7             | 7                         | 14                            | 14      | 6.7                                       |                        |
| 8   | PCE8103                | 3L        | 13,694,645 | 13,696,718 | 2,074    | bru-3         | -70328                 | CG8757       | +94402                 | 11            | 19                        | 5                             | 9       | 6.6                                       |                        |
| 9   | PCE8117                | X         | 3,759,878  | 3,761,211  | 1,334    | CG6414        | -47914                 | CG32790      | -57320                 | 11            | 13                        | 8                             | 10      | 6.5                                       |                        |
| 10  | PCE8129                | 2R        | 14,972,099 | 14,973,036 | 938      | CG13872       | -27466                 | CG30447      | -37992                 | 9             | 11                        | 10                            | 12      | 6.3                                       |                        |
| 11  | PCE8136                | 3R        | 22,574,127 | 22,575,106 | 980      | CG14247       | +21199                 | Tl           | -39023                 | 9             | 11                        | 9                             | 11      | 6.2                                       |                        |
| 12  | PCE8143                | 2L        | 4,608,553  | 4,609,408  | 856      | CG15636       | -37881                 | CG15635      | -26276                 | 9             | 9                         | 11                            | 11      | 6.1                                       |                        |
| 13  | PCE8157                | 3L        | 6,803,270  | 6,805,319  | 2,050    | vvl           | +53582                 | Prat2        | +68174                 | 10            | 17                        | 5                             | 8       | 5.9                                       |                        |
| 14  | PCE8181                | X         | 7,223,353  | 7,224,268  | 916      | CG11368       | +30769                 | CG32719      | +28952                 | 8             | 10                        | 9                             | 11      | 5.7                                       |                        |
| 15  | PCE8211                | 3L        | 17,081,997 | 17,082,675 | 679      | CG32169       | -54916                 | CG32175      | -62914                 | 6             | 9                         | 9                             | 13      | 5.4                                       |                        |
| 16  | PCE8213                | 2L        | 15,126,955 | 15,127,670 | 716      | stc           | +35389                 | BG:DS03192.2 | +28735                 | 7             | 8                         | 10                            | 11      | 5.4                                       |                        |
| 17  | PCE8227                | X         | 9,459,015  | 9,459,728  | 714      | <b>btd</b>    | +25844                 | Sp1          | -32214                 | 6             | 9                         | 8                             | 13      | 5.2                                       |                        |
| 18  | PCE8236                | 3L        | 14,425,844 | 14,427,189 | 1,346    | <b>CG9598</b> | -59632                 | CG9587       | +34939                 | 7             | 14                        | 5                             | 10      | 5.2                                       |                        |
| 19  | PCE8238                | 3R        | 6,816,094  | 6,817,260  | 1,167    | CG4683        | +40036                 | CG14698      | -42974                 | 6             | 14                        | 5                             | 12      | 5.2                                       |                        |
| 20  | PCE8241                | 3L        | 13,718,324 | 13,719,301 | 978      | bru-3         | -94007                 | CG8757       | -71819                 | 8             | 9                         | 8                             | 9       | 5.1                                       |                        |
| 21  | PCE8250                | 2L        | 15,504,649 | 15,505,259 | 611      | lace          | +27456                 | BG:DS04862.2 | -23296                 | 6             | 7                         | 10                            | 11      | 5.1                                       |                        |
| 22  | PCE8256                | 3R        | 23,981,950 | 23,982,629 | 680      | CG12425       | +20039                 | CG4787       | -67557                 | 6             | 8                         | 9                             | 12      | 5.1                                       |                        |
| 23  | PCE8262                | 3L        | 1,983,617  | 1,984,483  | 867      | CG1139        | +31327                 | CG32308      | +34340                 | 5             | 12                        | 6                             | 14      | 5.1                                       |                        |
| 24  | PCE8265                | 3L        | 17,067,775 | 17,068,886 | 1,112    | CG32169       | -40694                 | CG32175      | -76703                 | 8             | 10                        | 7                             | 9       | 5.0                                       |                        |
| 25  | PCE8266                | 2L        | 7,934,371  | 7,935,089  | 719      | CG14532       | -42105                 | CG7233       | +33332                 | 5             | 10                        | 7                             | 14      | 5.0                                       |                        |
| 26  | PCE8288                | 3L        | 6,806,987  | 6,808,084  | 1,098    | vvl           | +57299                 | Prat2        | +65409                 | 7             | 11                        | 6                             | 10      | 4.9                                       |                        |
| 27  | PCE8289                | 3L        | 9,880,833  | 9,881,539  | 707      | CG8104        | +24076                 | CG14163      | -20383                 | 6             | 8                         | 8                             | 11      | 4.9                                       |                        |
| 28  | PCE8291                | 3R        | 7,146,552  | 7,147,455  | 904      | CG31386       | -25554                 | KP78b        | +26726                 | 5             | 12                        | 6                             | 13      | 4.9                                       |                        |
| 29  | PCE8299                | X         | 11,021,178 | 11,023,802 | 2,625    | CG15198       | +30831                 | CG12624      | +27945                 | 9             | 16                        | 3                             | 6       | 4.9                                       |                        |
| 30  | PCE8303                | X         | 8,100,707  | 8,101,292  | 586      | nAcRalpha-7E  | -32083                 | CG1387       | -23434                 | 6             | 6                         | 10                            | 10      | 4.9                                       |                        |
| 31  | PCE8313                | X         | 2,779,499  | 2,781,121  | 1,623    | <b>rst</b>    | -48896                 | CG4116       | +43212                 | 6             | 16                        | 4                             | 10      | 4.8                                       |                        |
| 32  | PCE8316                | 3L        | 18,303,559 | 18,304,889 | 1,331    | <b>grim</b>   | -50266                 | <b>rpr</b>   | +42393                 | 8             | 11                        | 6                             | 8       | 4.8                                       |                        |
| 33  | PCE8366                | 3L        | 15,357,679 | 15,358,733 | 1,055    | <b>Toil-6</b> | +72101                 | CG7804       | +64256                 | 6             | 11                        | 6                             | 10      | 4.6                                       |                        |
| 34  | PCE8372                | 2R        | 15,108,654 | 15,109,286 | 633      | CG16898       | -39955                 | <b>18w</b>   | -65936                 | 6             | 6                         | 9                             | 9       | 4.6                                       |                        |
| 35  | PCE8374                | 3L        | 10,559,477 | 10,560,308 | 832      | CG32062       | +85944                 | CG14151      | +25705                 | 7             | 7                         | 8                             | 8       | 4.6                                       |                        |
| 36  | PCE8375                | 3L        | 3,662,629  | 3,663,652  | 1,024    | CG10862       | -27229                 | CG32264      | +63648                 | 7             | 9                         | 7                             | 9       | 4.6                                       |                        |
| 37  | PCE8384                | 3L        | 15,387,239 | 15,389,216 | 1,978    | <b>Toil-6</b> | +101661                | CG7804       | +33773                 | 7             | 15                        | 4                             | 8       | 4.5                                       |                        |
| 38  | PCE8387                | 3L        | 17,094,856 | 17,095,574 | 719      | CG32169       | -67775                 | CG32175      | -50015                 | 6             | 7                         | 8                             | 10      | 4.5                                       |                        |
| 39  | PCE8400                | 3L        | 17,047,361 | 17,048,418 | 1,058    | CG32169       | -20280                 | CG32175      | -97171                 | 7             | 9                         | 7                             | 9       | 4.5                                       |                        |
| 40  | PCE8414                | 2L        | 16,923,989 | 16,924,656 | 668      | CG4841        | +35228                 | beat-IIIb    | -38082                 | 6             | 6                         | 9                             | 9       | 4.4                                       |                        |
| 41  | PCE8457                | 2R        | 12,994,419 | 12,995,795 | 1,377    | elk           | +56748                 | PpY-55A      | +24500                 | 8             | 9                         | 6                             | 7       | 4.2                                       |                        |
| 42  | PCE8482                | 2L        | 15,201,110 | 15,202,188 | 1,079    | BG:DS03192.2  | -44705                 | BG:DS07295.1 | +21815                 | 5             | 11                        | 5                             | 10      | 4.1                                       |                        |
| 43  | PCE8496                | 2L        | 11,379,043 | 11,379,593 | 551      | salr          | +24857                 | <b>salm</b>  | +54881                 | 5             | 5                         | 9                             | 9       | 4.1                                       |                        |
| 44  | PCE8506                | 3L        | 22,055,340 | 22,056,006 | 667      | msopa         | +55255                 | CG15374      | -26698                 | 4             | 8                         | 6                             | 12      | 4.0                                       |                        |
| 45  | PCE8508                | 3L        | 18,317,741 | 18,318,637 | 897      | <b>grim</b>   | -64448                 | <b>rpr</b>   | +28645                 | 5             | 9                         | 6                             | 10      | 4.0                                       |                        |
| 46  | PCE8526                | X         | 17,242,931 | 17,243,574 | 644      | CG8557        | -22657                 | CG12432      | +22003                 | 5             | 6                         | 8                             | 9       | 4.0                                       |                        |
| 47  | PCE8551                | 2L        | 19,194,846 | 19,195,508 | 663      | drl           | +26418                 | CG31797      | +44708                 | 5             | 6                         | 8                             | 9       | 3.9                                       |                        |
| 48  | PCE8562                | 2L        | 11,385,288 | 11,386,373 | 1,086    | salr          | +31102                 | <b>salm</b>  | +48101                 | 7             | 7                         | 6                             | 6       | 3.9                                       |                        |
| 49  | PCE8571                | 3R        | 15,106,844 | 15,107,813 | 970      | CG14280       | +23840                 | <b>DI</b>    | +44139                 | 5             | 9                         | 5                             | 9       | 3.8                                       |                        |
| 50  | PCE8608                | 3L        | 22,035,396 | 22,036,187 | 792      | msopa         | +35311                 | CG15374      | -46517                 | 5             | 7                         | 6                             | 9       | 3.7                                       |                        |
| 51  | PCE8609                | 2L        | 9,039,358  | 9,040,057  | 700      | CG9582        | -21723                 | CG31708      | +23336                 | 5             | 6                         | 7                             | 9       | 3.7                                       |                        |
| 52  | PCE8614                | X         | 7,214,348  | 7,215,053  | 706      | CG11368       | +21764                 | CG32719      | +38167                 | 5             | 6                         | 7                             | 8       | 3.7                                       |                        |
| 53  | PCE8618                | 2R        | 1,613,226  | 1,614,627  | 1,402    |               | +49557                 | CG15233      | +47253                 | 6             | 10                        | 4                             | 7       | 3.7                                       | 1.28                   |
| 54  | PCE8630                | 3R        | 888,267    | 888,982    | 716      | CG2022        | -73796                 | <b>corto</b> | +23423                 | 5             | 6                         | 7                             | 8       | 3.7                                       |                        |
| 55  | PCE8646                | 3R        | 19,252,743 | 19,253,575 | 833      | CG4374        | -23757                 | CG31225      | -44770                 | 5             | 7                         | 6                             | 8       | 3.6                                       |                        |
| 56  | PCE8652                | 3L        | 18,314,668 | 18,316,059 | 1,392    | <b>grim</b>   | -61375                 | <b>rpr</b>   | +31223                 | 7             | 8                         | 5                             | 6       | 3.6                                       |                        |
| 57  | PCE8654                | 2L        | 17,827,486 | 17,829,189 | 1,704    | CadN2         | -36799                 | CG5674       | -112231                | 6             | 11                        | 4                             | 6       | 3.6                                       |                        |
| 58  | PCE8664                | 2L        | 12,556,729 | 12,557,586 | 858      | <b>bun</b>    | -27288                 | CG15489      | -25071                 | 5             | 7                         | 6                             | 8       | 3.5                                       |                        |
| 59  | PCE8667                | 2L        | 7,930,722  | 7,931,898  | 1,177    | CG14532       | -38456                 | CG7233       | +36523                 | 4             | 11                        | 3                             | 9       | 3.5                                       |                        |
| 60  | PCE8681                | 3L        | 10,558,497 | 10,559,123 | 627      | CG32062       | +84964                 | CG14151      | +26890                 | 4             | 6                         | 6                             | 10      | 3.5                                       |                        |
| 61  | PCE8687                | X         | 15,920,993 | 15,921,765 | 773      | disco-r       | -66780                 | <b>disco</b> | +25988                 | 5             | 6                         | 6                             | 8       | 3.5                                       |                        |
| 62  | PCE8704                | 3L        | 10,328,230 | 10,328,919 | 690      | CG6559        | -57988                 | CG12362      | -41425                 | 5             | 5                         | 7                             | 7       | 3.4                                       |                        |
| 63  | PCE8740                | X         | 17,090,028 | 17,091,547 | 1,520    | B-H2          | +44489                 | B-H1         | -36912                 | 6             | 9                         | 4                             | 6       | 3.3                                       |                        |

| CRM | Overlaps known element | Chrom arm | pCRM start | pCRM end   | pCRM len | 5' gene    | pCRM relative position | 3' gene        | pCRM relative position | Aligned sites | Aligned + preserved sites | Aligned site dens | Aligned + preserved site dens | z-score | Additional Gap/pair-rule gene within 20kb | pCRM relative position |
|-----|------------------------|-----------|------------|------------|----------|------------|------------------------|----------------|------------------------|---------------|---------------------------|-------------------|-------------------------------|---------|-------------------------------------------|------------------------|
| 64  | PCE8742                | X         | 6,903,757  | 6,904,845  | 1,089    | fz4        | -53089                 | CG32729        | -25259                 | 5             | 8                         | 5                 | 7                             | 3.3     |                                           |                        |
| 65  | PCE8754                | 3L        | 5,363,522  | 5,364,210  | 689      | CG10633    | -21393                 | CG4814         | -28104                 | 4             | 6                         | 6                 | 9                             | 3.2     |                                           |                        |
| 66  | PCE8758                | 3R        | 15,179,152 | 15,179,845 | 694      | <b>DI</b>  | -27200                 | CG3581         | +20643                 | 4             | 6                         | 6                 | 9                             | 3.2     |                                           |                        |
| 67  | PCE8762                | 3R        | 10,810,188 | 10,810,946 | 759      | CG3837     | +65769                 | CG14861        | -29563                 | 5             | 5                         | 7                 | 7                             | 3.2     |                                           |                        |
| 68  | PCE8766                | 2R        | 6,621,834  | 6,622,541  | 708      | <b>en</b>  | -28911                 | tou            | +24807                 | 4             | 6                         | 6                 | 8                             | 3.2     |                                           |                        |
| 69  | PCE8770                | 2R        | 15,450,910 | 15,451,441 | 532      | CG11192    | -32175                 | CG33041        | -36605                 | 4             | 4                         | 8                 | 8                             | 3.2     |                                           |                        |
| 70  | PCE8780                | 3L        | 12,609,305 | 12,609,843 | 539      | CG32111    | +23823                 | mirr           | -41451                 | 4             | 4                         | 7                 | 7                             | 3.1     |                                           |                        |
| 71  | PCE8785                | 3R        | 5,781,580  | 5,782,775  | 1,196    | CG32469    | +26927                 | CG12419        | -24745                 | 5             | 8                         | 4                 | 7                             | 3.1     |                                           |                        |
| 72  | PCE8790                | 3R        | 25,158,018 | 25,158,650 | 633      | Cnx99A     | -23286                 | CG11516        | -83139                 | 4             | 5                         | 6                 | 8                             | 3.1     |                                           |                        |
| 73  | PCE8823                | 2R        | 15,144,708 | 15,145,905 | 1,198    | CG16898    | -76009                 | <b>18w</b>     | -29317                 | 4             | 9                         | 3                 | 8                             | 3.0     |                                           |                        |
| 74  | PCE8848                | 3L        | 10,297,528 | 10,298,224 | 697      | CG6559     | -27286                 | CG12362        | -72120                 | 4             | 5                         | 6                 | 7                             | 2.9     |                                           |                        |
| 75  | PCE8849                | X         | 7,231,805  | 7,232,750  | 946      | CG11368    | +39221                 | CG32719        | +20470                 | 4             | 7                         | 4                 | 7                             | 2.8     |                                           |                        |
| 76  | PCE8869                | 3R        | 25,219,783 | 25,220,397 | 615      | Cnx99A     | -85051                 | CG11516        | -21392                 | 4             | 4                         | 7                 | 7                             | 2.8     |                                           |                        |
| 77  | PCE8874                | 3R        | 6,811,167  | 6,812,024  | 858      | CG4683     | +35109                 | CG14698        | -48210                 | 4             | 6                         | 5                 | 7                             | 2.7     |                                           |                        |
| 78  | PCE8899                | X         | 13,750,875 | 13,751,955 | 1,081    | Ste12DOR   | +20007                 | CG32605        | +40100                 | 4             | 7                         | 4                 | 6                             | 2.6     |                                           |                        |
| 79  | PCE8912                | 3L        | 6,364,086  | 6,364,835  | 750      | CG32398    | -34896                 | CG14910        | -56359                 | 3             | 6                         | 4                 | 8                             | 2.5     |                                           |                        |
| 80  | PCE8913                | 3R        | 13,011,195 | 13,012,329 | 1,135    | CG4090     | -25510                 | CG31262        | +32840                 | 4             | 7                         | 4                 | 6                             | 2.5     |                                           |                        |
| 81  | PCE8928                | 2L        | 4,591,626  | 4,592,645  | 1,020    | CG15636    | -20954                 | CG15635        | -43039                 | 4             | 6                         | 4                 | 6                             | 2.4     |                                           |                        |
| 82  | PCE8930                | X         | 6,154,146  | 6,155,480  | 1,335    | PpV        | -40929                 | CG3367         | +53724                 | 5             | 6                         | 4                 | 4                             | 2.4     |                                           |                        |
| 83  | PCE8933                | 3L        | 19,169,035 | 19,170,095 | 1,061    | <b>fz2</b> | -49530                 | mRplL21        | +33841                 | 4             | 6                         | 4                 | 6                             | 2.4     |                                           |                        |
| 84  | PCE8940                | 2R        | 10,133,926 | 10,135,029 | 1,104    | hbs        | +58803                 | <b>CG11798</b> | -57611                 | 4             | 6                         | 4                 | 5                             | 2.3     |                                           |                        |
| 85  | PCE8956                | 3L        | 3,670,899  | 3,671,897  | 999      | CG10862    | -35499                 | CG32264        | +55403                 | 4             | 5                         | 4                 | 5                             | 2.2     |                                           |                        |
| 86  | PCE8958                | 3R        | 10,765,993 | 10,766,966 | 974      | CG3837     | +21574                 | CG14861        | -73543                 | 3             | 6                         | 3                 | 6                             | 2.1     |                                           |                        |
| 87  | PCE8977                | CE8008    | 9,457,113  | 9,458,627  | 1,515    | <b>btd</b> | +23942                 | Sp1            | -33315                 | 2             | 5                         | 1                 | 3                             | 0.9     |                                           |                        |
