# Supplementary material for: Computational identification of developmental enhancers: conservation and function of transcription factor binding-site clusters in Drosophila melanogaster and Drosophila pseudoobscura
Source: Springer Nature journal article supplement (doi:10.1186/gb-2004-5-9-r61), 2004-08-20
Supplement: Additional file 9 [file gb-2004-5-9-r61-s9.pdf]

| <b>Gene</b> | <b>Evidence</b> |
|-------------|-----------------|
| Antp        | Both            |
| argos       | Both            |
| bcd         | Both            |
| bowl        | Both            |
| cad         | Both            |
| cas         | Both            |
| cnc         | Both            |
| comm        | Both            |
| D           | Both            |
| disco       | Both            |
| dpn         | Both            |
| emc         | Both            |
| en          | Both            |
| fhx         | Both            |
| gt          | Both            |
| hb          | Both            |
| htl         | Both            |
| ken         | Both            |
| knrl        | Both            |
| Kr          | Both            |
| l(1)sc      | Both            |
| noc         | Both            |
| Nrt         | Both            |
| nub         | Both            |
| odd         | Both            |
| opa         | Both            |
| Optix       | Both            |
| ovo         | Both            |
| pdm2        | Both            |
| Pka-C3      | Both            |
| pros        | Both            |
| Ptx1        | Both            |
| run         | Both            |
| slp1        | Both            |
| slp2        | Both            |
| sob         | Both            |
| tkv         | Both            |
| trx         | Both            |
| tsh         | Both            |
| wg          | Both            |
| 18w         | FlyBase         |
| anon-84Bd   | FlyBase         |
| btd         | FlyBase         |
| byn         | FlyBase         |
| cic         | FlyBase         |
| dap         | FlyBase         |
| Dfd         | FlyBase         |
| DI          | FlyBase         |
| dnt         | FlyBase         |
| ds          | FlyBase         |
| EcolNacZ    | FlyBase         |
| ems         | FlyBase         |

| <b>Gene</b>        | <b>Evidence</b> |
|--------------------|-----------------|
| eve                | FlyBase         |
| fog                | FlyBase         |
| ftz                | FlyBase         |
| fz2                | FlyBase         |
| grn                | FlyBase         |
| gsb                | FlyBase         |
| hh                 | FlyBase         |
| hkb                | FlyBase         |
| hth                | FlyBase         |
| iab-4              | FlyBase         |
| ImpL2              | FlyBase         |
| kni                | FlyBase         |
| nkd                | FlyBase         |
| nos                | FlyBase         |
| oc                 | FlyBase         |
| ph-d               | FlyBase         |
| ph-p               | FlyBase         |
| pnr                | FlyBase         |
| pnt                | FlyBase         |
| psq                | FlyBase         |
| pum                | FlyBase         |
| Rac2               | FlyBase         |
| retn               | FlyBase         |
| salm               | FlyBase         |
| Scer\GAL4          | FlyBase         |
| Six4               | FlyBase         |
| sna                | FlyBase         |
| Sry- $\delta$      | FlyBase         |
| stau               | FlyBase         |
| Sxl                | FlyBase         |
| Syx1A              | FlyBase         |
| tll                | FlyBase         |
| Tom                | FlyBase         |
| trn                | FlyBase         |
| tsg                | FlyBase         |
| tsl                | FlyBase         |
| vnd                | FlyBase         |
| Wnt2               | FlyBase         |
| Wnt5               | FlyBase         |
| 5-HT2              | Both            |
| 26-29kD-proteinase | BDGP insitu     |
| Adam               | BDGP insitu     |
| Alhambra           | BDGP insitu     |
| Ama                | BDGP insitu     |
| Ance               | BDGP insitu     |
| apt                | BDGP insitu     |
| ara                | BDGP insitu     |
| asp                | BDGP insitu     |
| BEAF-32            | BDGP insitu     |
| Best2              | BDGP insitu     |
| BG DS02780.1       | BDGP insitu     |
| BG DS05899.3       | BDGP insitu     |

| <b>Gene</b> | <b>Evidence</b> |
|-------------|-----------------|
| brat        | BDGP insitu     |
| Bsg25A      | BDGP insitu     |
| Btk29A      | BDGP insitu     |
| bun         | BDGP insitu     |
| bwa         | BDGP insitu     |
| Cad74A      | BDGP insitu     |
| CalpA       | BDGP insitu     |
| cenB1A      | BDGP insitu     |
| cenG1A      | BDGP insitu     |
| CG10176     | BDGP insitu     |
| CG10283     | BDGP insitu     |
| CG10479     | BDGP insitu     |
| CG10728     | BDGP insitu     |
| CG10924     | BDGP insitu     |
| CG10967     | BDGP insitu     |
| CG11188     | BDGP insitu     |
| CG11208     | BDGP insitu     |
| CG11696     | BDGP insitu     |
| CG11798     | BDGP insitu     |
| CG12581     | BDGP insitu     |
| CG12708     | BDGP insitu     |
| CG12802     | BDGP insitu     |
| CG13290     | BDGP insitu     |
| CG13651     | BDGP insitu     |
| CG13894     | BDGP insitu     |
| CG14427     | BDGP insitu     |
| CG14430     | BDGP insitu     |
| CG1447      | BDGP insitu     |
| CG14657     | BDGP insitu     |
| CG14889     | BDGP insitu     |
| CG14937     | BDGP insitu     |
| CG1561      | BDGP insitu     |
| CG1621      | BDGP insitu     |
| CG17390     | BDGP insitu     |
| CG17724     | BDGP insitu     |
| CG17786     | BDGP insitu     |
| CG1815      | BDGP insitu     |
| CG2791      | BDGP insitu     |
| CG30015     | BDGP insitu     |
| CG30023     | BDGP insitu     |
| CG30115     | BDGP insitu     |
| CG3097      | BDGP insitu     |
| CG31246     | BDGP insitu     |
| CG31305     | BDGP insitu     |
| CG31320     | BDGP insitu     |
| CG3136      | BDGP insitu     |
| CG31431     | BDGP insitu     |
| CG31607     | BDGP insitu     |
| CG31670     | BDGP insitu     |
| CG31721     | BDGP insitu     |
| CG31871     | BDGP insitu     |
| CG32026     | BDGP insitu     |

| <b>Gene</b> | <b>Evidence</b> |
|-------------|-----------------|
| CG32306     | BDGP insitu     |
| CG32425     | BDGP insitu     |
| CG32434     | BDGP insitu     |
| CG32473     | BDGP insitu     |
| CG3252      | BDGP insitu     |
| CG32982     | BDGP insitu     |
| CG33099     | BDGP insitu     |
| CG33207     | BDGP insitu     |
| CG3424      | BDGP insitu     |
| CG3509      | BDGP insitu     |
| CG3838      | BDGP insitu     |
| CG4040      | BDGP insitu     |
| CG4221      | BDGP insitu     |
| CG4702      | BDGP insitu     |
| CG4710      | BDGP insitu     |
| CG5249      | BDGP insitu     |
| CG5532      | BDGP insitu     |
| CG6654      | BDGP insitu     |
| CG6736      | BDGP insitu     |
| CG6755      | BDGP insitu     |
| CG6885      | BDGP insitu     |
| CG7047      | BDGP insitu     |
| CG7271      | BDGP insitu     |
| CG7428      | BDGP insitu     |
| CG7663      | BDGP insitu     |
| CG7915      | BDGP insitu     |
| CG7986      | BDGP insitu     |
| CG8001      | BDGP insitu     |
| CG8066      | BDGP insitu     |
| CG8092      | BDGP insitu     |
| CG8486      | BDGP insitu     |
| CG8788      | BDGP insitu     |
| CG8965      | BDGP insitu     |
| CG9005      | BDGP insitu     |
| CG9215      | BDGP insitu     |
| CG9238      | BDGP insitu     |
| CG9514      | BDGP insitu     |
| CG9598      | BDGP insitu     |
| CG9615      | BDGP insitu     |
| CG9924      | BDGP insitu     |
| corto       | BDGP insitu     |
| CrebA       | BDGP insitu     |
| crq         | BDGP insitu     |
| CycE        | BDGP insitu     |
| Cyp18a1     | BDGP insitu     |
| Cyp306a1    | BDGP insitu     |
| Cyt-b5      | BDGP insitu     |
| dbo         | BDGP insitu     |
| desat1      | BDGP insitu     |
| Dg          | BDGP insitu     |
| dm          | BDGP insitu     |
| Doc1        | BDGP insitu     |

| <b>Gene</b> | <b>Evidence</b> |
|-------------|-----------------|
| Doc2        | BDGP insitu     |
| Doc3        | BDGP insitu     |
| Dr          | BDGP insitu     |
| drm         | BDGP insitu     |
| E2f         | BDGP insitu     |
| Egfr        | BDGP insitu     |
| Eip71CD     | BDGP insitu     |
| Esp         | BDGP insitu     |
| exex        | BDGP insitu     |
| eya         | BDGP insitu     |
| fj          | BDGP insitu     |
| fok         | BDGP insitu     |
| Gasp        | BDGP insitu     |
| Glu-RI      | BDGP insitu     |
| grim        | BDGP insitu     |
| gukh        | BDGP insitu     |
| Hel89B      | BDGP insitu     |
| HLHm5       | BDGP insitu     |
| ImpE2       | BDGP insitu     |
| jbug        | BDGP insitu     |
| jing        | BDGP insitu     |
| jumu        | BDGP insitu     |
| kel         | BDGP insitu     |
| kn          | BDGP insitu     |
| l(3)10615   | BDGP insitu     |
| lab         | BDGP insitu     |
| mae         | BDGP insitu     |
| MESR3       | BDGP insitu     |
| mew         | BDGP insitu     |
| mfas        | BDGP insitu     |
| Mipp1       | BDGP insitu     |
| mira        | BDGP insitu     |
| Mkp3        | BDGP insitu     |
| mRpS34      | BDGP insitu     |
| mspo        | BDGP insitu     |
| Ndae1       | BDGP insitu     |
| NetA        | BDGP insitu     |
| NetB        | BDGP insitu     |
| Pepck       | BDGP insitu     |
| Pfrx        | BDGP insitu     |
| phyl        | BDGP insitu     |
| ppa         | BDGP insitu     |
| prd         | BDGP insitu     |
| Pvf3        | BDGP insitu     |
| RhoGEF3     | BDGP insitu     |
| rib         | BDGP insitu     |
| rst         | BDGP insitu     |
| ry          | BDGP insitu     |
| sala        | BDGP insitu     |
| Sec61beta   | BDGP insitu     |
| sim         | BDGP insitu     |
| so          | BDGP insitu     |

| <b>Gene</b> | <b>Evidence</b> |
|-------------|-----------------|
| SoxN        | BDGP insitu     |
| srp         | BDGP insitu     |
| Sry-beta    | BDGP insitu     |
| stwl        | BDGP insitu     |
| Su(H)       | BDGP insitu     |
| Sulf1       | BDGP insitu     |
| tap         | BDGP insitu     |
| Thiolase    | BDGP insitu     |
| tin         | BDGP insitu     |
| Tkr         | BDGP insitu     |
| tld         | BDGP insitu     |
| tok         | BDGP insitu     |
| Toll-6      | BDGP insitu     |
| toy         | BDGP insitu     |
| Traf1       | BDGP insitu     |
| Tre1        | BDGP insitu     |
| Ugt37b1     | BDGP insitu     |
| Wnt8        | BDGP insitu     |
| yellow-e3   | BDGP insitu     |
| zfh1        | BDGP insitu     |
