# Supplementary material for: Computational identification of developmental enhancers: conservation and function of transcription factor binding-site clusters in Drosophila melanogaster and Drosophila pseudoobscura
Source: Springer Nature journal article supplement (doi:10.1186/gb-2004-5-9-r61), 2004-08-20
Supplement: Additional file 11 [file gb-2004-5-9-r61-s11.pdf]

| CRM | Overlaps | Chrom arm | pCRM start | pCRM end   | pCRM len | 5' gene                   | pCRM relative position | 3' gene             | pCRM relative position | Aligned sites | Aligned + preserved sites | Aligned site dens | Aligned + preserved site dens | z-score | Additional Gap/pair-rule gene within 20kb | pCRM relative position |
|-----|----------|-----------|------------|------------|----------|---------------------------|------------------------|---------------------|------------------------|---------------|---------------------------|-------------------|-------------------------------|---------|-------------------------------------------|------------------------|
| 1   | PCE8079  | 3L        | 19,144,705 | 19,145,326 | 622      | <b>fz2</b>                | -25200                 | mRplL21             | +58610                 | 9             | 9                         | 14                | 14                            | 7.5     |                                           |                        |
| 2   | PCE8101  | 3L        | 19,148,678 | 19,149,172 | 495      | <b>fz2</b>                | -29173                 | mRplL21             | +54764                 | 7             | 7                         | 14                | 14                            | 6.7     |                                           |                        |
| 3   | PCE8111  | 3L        | 8,612,337  | 8,613,016  | 680      | CG6486                    | +4104                  | <b>h</b>            | -21652                 | 8             | 9                         | 12                | 13                            | 6.5     |                                           |                        |
| 4   | PCE8152  | 2L        | 16,363,535 | 16,364,908 | 1,374    | BG:DS09218.5              | +19533                 | <b>BG:DS02780.1</b> | +61641                 | 8             | 16                        | 6                 | 12                            | 6.0     |                                           |                        |
| 5   | PCE8164  | 2L        | 8,839,488  | 8,841,115  | 1,628    | <b>SoxN</b>               | +21633                 | CG32986             | -13922                 | 10            | 14                        | 6                 | 9                             | 5.8     |                                           |                        |
| 6   | PCE8227  | X         | 9,459,015  | 9,459,728  | 714      | <b>btd</b>                | +25844                 | Sp1                 | -32214                 | 6             | 9                         | 8                 | 13                            | 5.2     |                                           |                        |
| 7   | PCE8236  | 3L        | 14,425,844 | 14,427,189 | 1,346    | <b>CG9598</b>             | -59632                 | CG9587              | +34939                 | 7             | 14                        | 5                 | 10                            | 5.2     |                                           |                        |
| 8   | PCE8240  | 3R        | 12,696,513 | 12,697,212 | 700      | <b>abd-A</b>              | -40725                 | CG10349             | -8252                  | 7             | 7                         | 10                | 10                            | 5.1     |                                           |                        |
| 9   | PCE8255  | ubx PBX   | 12,598,962 | 12,599,746 | 785      | <b>CG31275 (Ubx adj.)</b> | -21833                 | Glut3               | -14304                 | 7             | 8                         | 9                 | 10                            | 5.1     |                                           |                        |
| 10  | PCE8286  | 3R        | 25,392,093 | 25,392,797 | 705      | <b>Dr</b>                 | +20619                 | CG7567              | +10391                 | 6             | 8                         | 9                 | 11                            | 4.9     |                                           |                        |
| 11  | PCE8292  | 2L        | 14,441,774 | 14,442,414 | 641      | BG:DS08340.1              | -8806                  | <b>noc</b>          | -30599                 | 6             | 7                         | 9                 | 11                            | 4.9     |                                           |                        |
| 12  | PCE8313  | X         | 2,779,499  | 2,781,121  | 1,623    | <b>rst</b>                | -48896                 | CG4116              | +43212                 | 6             | 16                        | 4                 | 10                            | 4.8     |                                           |                        |
| 13  | PCE8316  | 3L        | 18,303,559 | 18,304,889 | 1,331    | <b>grim</b>               | -50266                 | <b>rpr</b>          | +42393                 | 8             | 11                        | 6                 | 8                             | 4.8     |                                           |                        |
| 14  | PCE8346  | 2L        | 12,569,943 | 12,571,337 | 1,395    | <b>bun</b>                | -40502                 | CG15489             | -11320                 | 6             | 14                        | 4                 | 10                            | 4.7     |                                           |                        |
| 15  | PCE8359  | 3R        | 3,961,949  | 3,962,994  | 1,046    | CG7891                    | +9599                  | <b>grn</b>          | +44185                 | 8             | 8                         | 8                 | 8                             | 4.7     |                                           |                        |
| 16  | PCE8366  | 3L        | 15,357,679 | 15,358,733 | 1,055    | <b>Toll-6</b>             | +72101                 | CG7804              | +64256                 | 6             | 11                        | 6                 | 10                            | 4.6     |                                           |                        |
| 17  | PCE8372  | 2R        | 15,108,654 | 15,109,286 | 633      | CG16898                   | -39955                 | <b>18w</b>          | -65936                 | 6             | 6                         | 9                 | 9                             | 4.6     |                                           |                        |
| 18  | PCE8377  | X         | 14,416,809 | 14,417,729 | 921      | CG5321                    | +6191                  | <b>NetB</b>         | +62559                 | 5             | 11                        | 5                 | 12                            | 4.6     |                                           |                        |
| 19  | PCE8378  | 3L        | 5,114,119  | 5,116,458  | 2,340    | Srp54k                    | +2242                  | <b>CG32423</b>      | +27644                 | 8             | 15                        | 3                 | 6                             | 4.6     |                                           |                        |
| 20  | PCE8384  | 3L        | 15,387,239 | 15,389,216 | 1,978    | <b>Toll-6</b>             | +101661                | CG7804              | +33773                 | 7             | 15                        | 4                 | 8                             | 4.5     |                                           |                        |
| 21  | PCE8432  | 2L        | 21,728,314 | 21,729,432 | 1,119    | <b>tsh</b>                | +66599                 | CG11629             | +1950                  | 5             | 12                        | 4                 | 11                            | 4.3     |                                           |                        |
| 22  | PCE8447  | 3R        | 17,401,939 | 17,403,156 | 1,218    | InR                       | -4724                  | <b>E2f</b>          | +46552                 | 6             | 11                        | 5                 | 9                             | 4.3     |                                           |                        |
| 23  | PCE8472  | 2L        | 12,563,964 | 12,564,680 | 717      | <b>bun</b>                | -34523                 | CG15489             | -17977                 | 4             | 9                         | 6                 | 13                            | 4.2     |                                           |                        |
| 24  | PCE8496  | 2L        | 11,379,043 | 11,379,593 | 551      | salr                      | +24857                 | <b>salm</b>         | +54881                 | 5             | 5                         | 9                 | 9                             | 4.1     |                                           |                        |
| 25  | PCE8508  | 3L        | 18,317,741 | 18,318,637 | 897      | <b>grim</b>               | -64448                 | <b>rpr</b>          | +28645                 | 5             | 9                         | 6                 | 10                            | 4.0     |                                           |                        |
| 26  | PCE8535  | 3R        | 2,859,299  | 2,860,288  | 990      | <b>Antp</b>               | -33021                 | Sodh-1              | -17769                 | 6             | 8                         | 6                 | 8                             | 3.9     |                                           |                        |
| 27  | PCE8562  | 2L        | 11,385,288 | 11,386,373 | 1,086    | salr                      | +31102                 | <b>salm</b>         | +48101                 | 7             | 7                         | 6                 | 6                             | 3.9     |                                           |                        |
| 28  | PCE8571  | 3R        | 15,106,844 | 15,107,813 | 970      | CG14280                   | +23840                 | <b>DI</b>           | +44139                 | 5             | 9                         | 5                 | 9                             | 3.8     |                                           |                        |
| 29  | PCE8581  | 2L        | 16,355,350 | 16,356,517 | 1,168    | BG:DS09218.5              | +11348                 | <b>BG:DS02780.1</b> | +70032                 | 6             | 9                         | 5                 | 8                             | 3.8     |                                           |                        |
| 30  | PCE8588  | X         | 15,857,208 | 15,857,812 | 605      | disco-r                   | -2995                  | <b>disco</b>        | +89941                 | 3             | 8                         | 5                 | 13                            | 3.8     |                                           |                        |
| 31  | PCE8592  | 2L        | 3,852,586  | 3,853,784  | 1,199    | <b>slp2</b>               | +23176                 | CG3964              | -1465                  | 6             | 9                         | 5                 | 8                             | 3.8     |                                           |                        |
| 32  | PCE8598  | 2L        | 7,326,567  | 7,327,139  | 573      | <b>wg</b>                 | +25247                 | Wnt6                | -15989                 | 4             | 6                         | 7                 | 10                            | 3.8     |                                           |                        |
| 33  | PCE8630  | 3R        | 888,267    | 888,982    | 716      | CG2022                    | -73796                 | <b>corto</b>        | +23423                 | 5             | 6                         | 7                 | 8                             | 3.7     |                                           |                        |
| 34  | PCE8652  | 3L        | 18,314,668 | 18,316,059 | 1,392    | <b>grim</b>               | -61375                 | <b>rpr</b>          | +31223                 | 7             | 8                         | 5                 | 6                             | 3.6     |                                           |                        |
| 35  | PCE8664  | 2L        | 12,556,729 | 12,557,586 | 858      | <b>bun</b>                | -27288                 | CG15489             | -25071                 | 5             | 7                         | 6                 | 8                             | 3.5     |                                           |                        |
| 36  | PCE8687  | X         | 15,920,993 | 15,921,765 | 773      | disco-r                   | -66780                 | <b>disco</b>        | +25988                 | 5             | 6                         | 6                 | 8                             | 3.5     |                                           |                        |
| 37  | PCE8734  | 3R        | 9,766,472  | 9,767,187  | 716      | <b>ems</b>                | +38873                 | CG9929              | +1956                  | 5             | 5                         | 7                 | 7                             | 3.3     |                                           |                        |
| 38  | PCE8750  | 2L        | 21,722,836 | 21,723,621 | 786      | <b>tsh</b>                | +61121                 | CG11629             | +7761                  | 4             | 7                         | 5                 | 9                             | 3.3     |                                           |                        |
| 39  | PCE8758  | 3R        | 15,179,152 | 15,179,845 | 694      | <b>DI</b>                 | -27200                 | CG3581              | +20643                 | 4             | 6                         | 6                 | 9                             | 3.2     |                                           |                        |
| 40  | PCE8766  | 2R        | 6,621,834  | 6,622,541  | 708      | <b>en</b>                 | -28911                 | <b>tou</b>          | +24807                 | 4             | 6                         | 6                 | 8                             | 3.2     |                                           |                        |
| 41  | PCE8823  | 2R        | 15,144,708 | 15,145,905 | 1,198    | CG16898                   | -76009                 | <b>18w</b>          | -29317                 | 4             | 9                         | 3                 | 8                             | 3.0     |                                           |                        |
| 42  | PCE8828  | 3R        | 15,192,208 | 15,193,724 | 1,517    | <b>DI</b>                 | -40256                 | CG3581              | +6764                  | 5             | 9                         | 3                 | 6                             | 2.9     |                                           |                        |
| 43  | PCE8852  | 3R        | 25,333,346 | 25,334,048 | 703      | CG2014                    | +2414                  | <b>Dr</b>           | -37426                 | 4             | 5                         | 6                 | 7                             | 2.8     |                                           |                        |
| 44  | PCE8903  | 2L        | 7,324,059  | 7,324,852  | 794      | <b>wg</b>                 | +22739                 | Wnt6                | -18276                 | 4             | 5                         | 5                 | 6                             | 2.6     |                                           |                        |
| 45  | PCE8933  | 3L        | 19,169,035 | 19,170,095 | 1,061    | <b>fz2</b>                | -49530                 | mRplL21             | +33841                 | 4             | 6                         | 4                 | 6                             | 2.4     |                                           |                        |
| 46  | PCE8940  | 2R        | 10,133,926 | 10,135,029 | 1,104    | <b>hbs</b>                | +58803                 | <b>CG11798</b>      | -57611                 | 4             | 6                         | 4                 | 5                             | 2.3     |                                           |                        |
| 47  | PCE8977  | CE8008    | 9,457,113  | 9,458,627  | 1,515    | <b>btd</b>                | +23942                 | Sp1                 | -33315                 | 2             | 5                         | 1                 | 3                             | 0.9     |                                           |                        |
