# Supplementary figures and images for: Computational identification of developmental enhancers: conservation and function of transcription factor binding-site clusters in Drosophila melanogaster and Drosophila pseudoobscura
Source: Springer Nature journal article supplement (doi:10.1186/gb-2004-5-9-r61), 2004-08-20

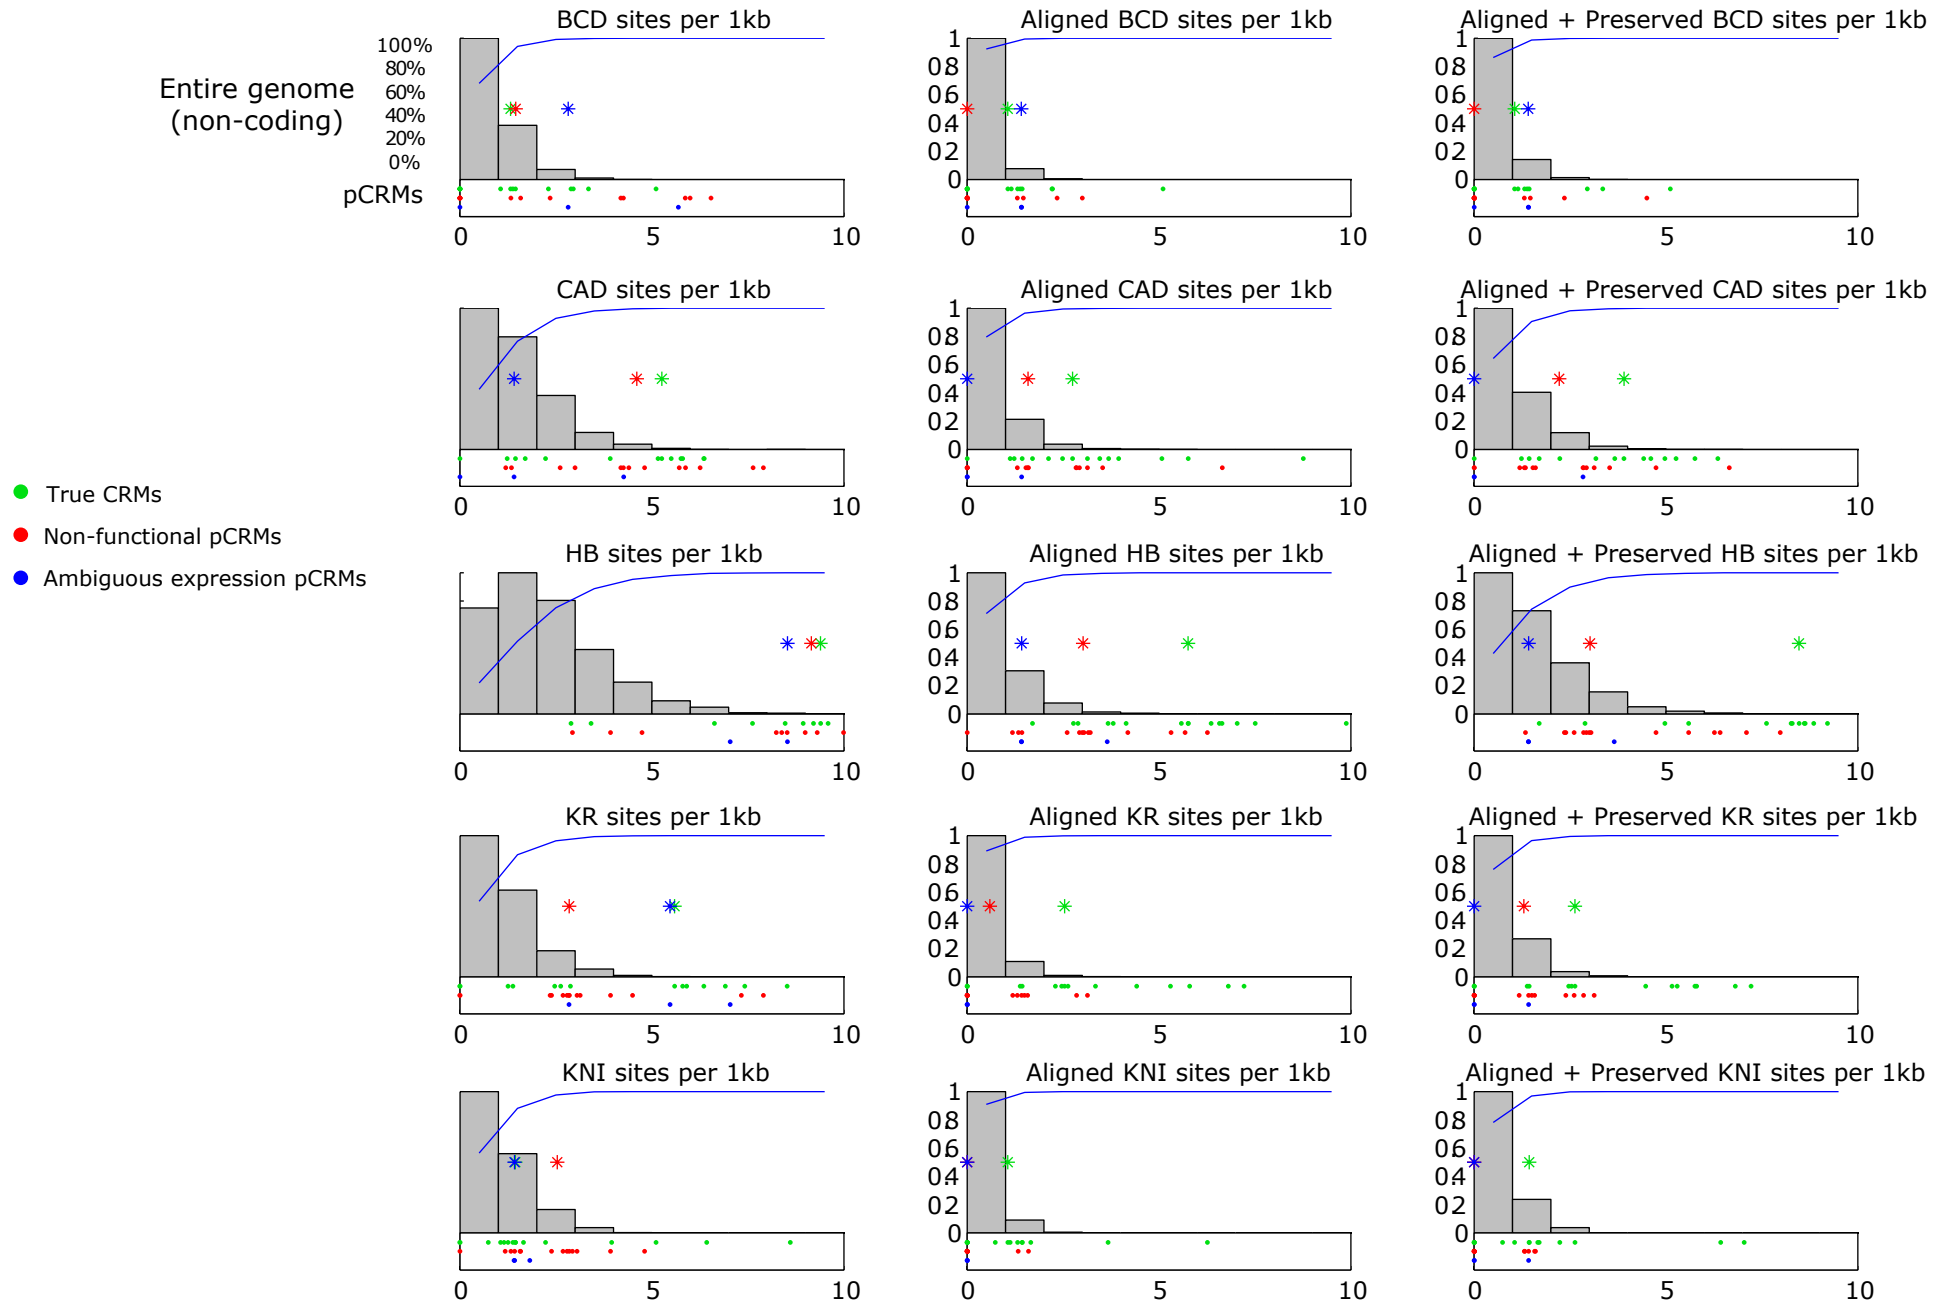

Supplement: Additional file 1 [file gb-2004-5-9-r61-s1.pdf]

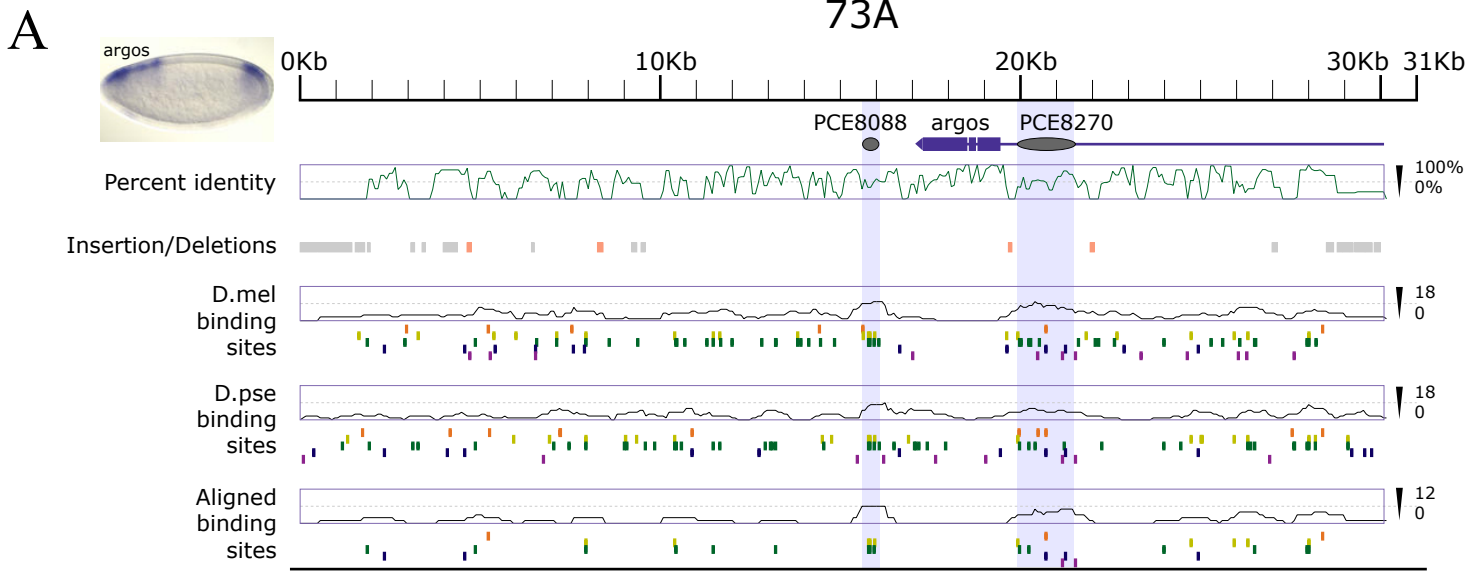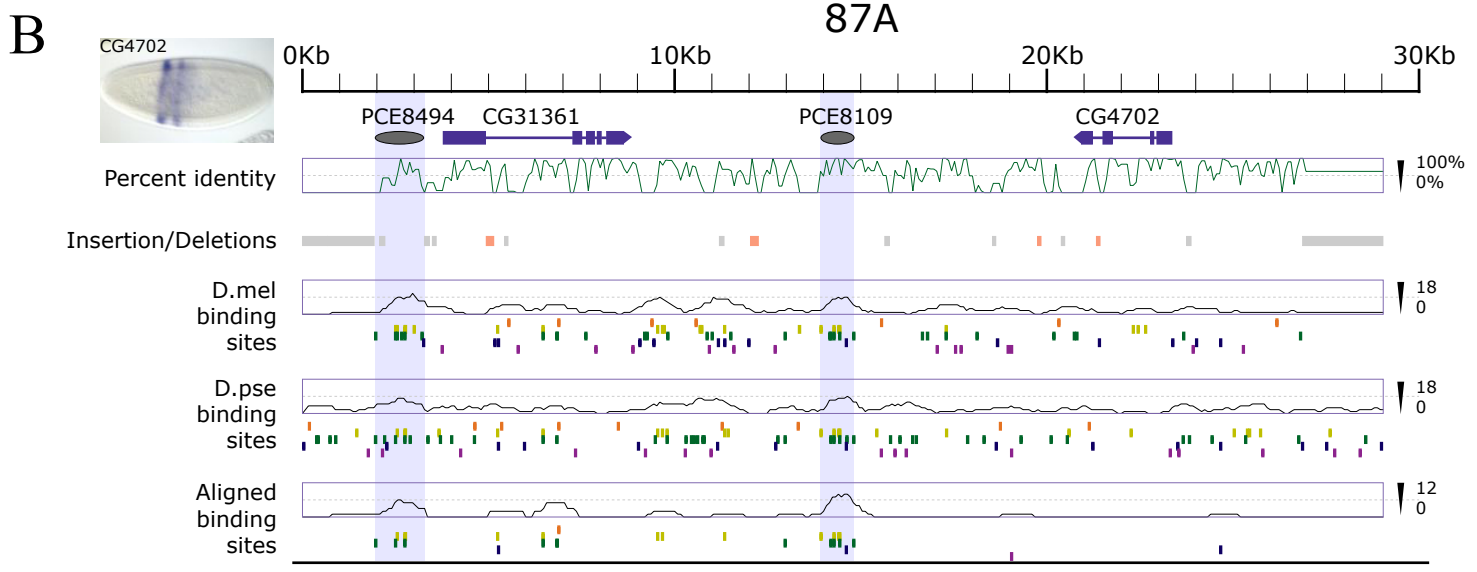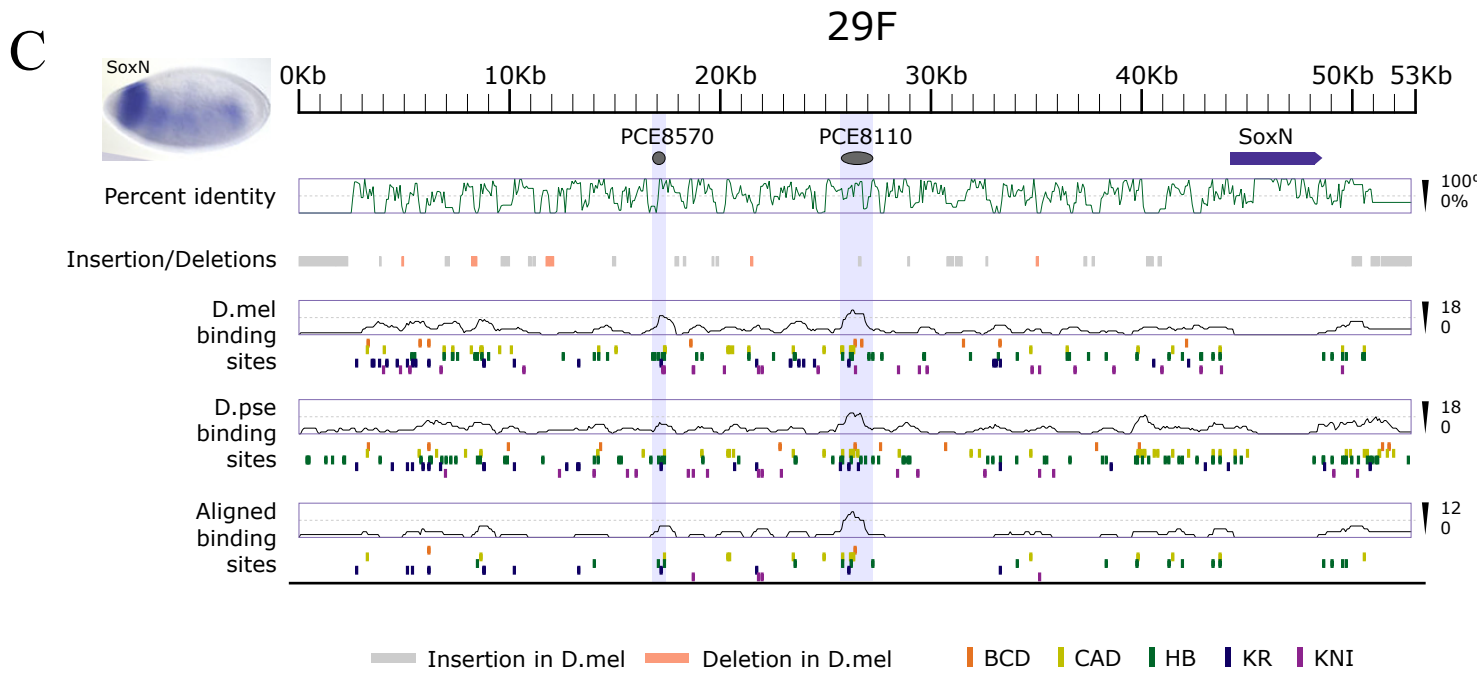

Supplement: Additional file 4 [file gb-2004-5-9-r61-s4.pdf]
